# Supplementary material
Source: PubMed Central journal article supplement (PMC4658596)
Supplement: supp_mol.115.099614_Supplemental_99614.pdf [file supp_mol.115.099614_Supplemental_99614.pdf]

## Oxidative Stress and Response to Thymidylate Synthase-Targeted Antimetabolites

Ufuk Ozer, Karen W. Barbour, Sarah A. Clinton, and Franklin G. Berger

MOLECULAR PHARMACOLOGY

### Supplemental Table 1. Fura-responsive genes as determined by cDNA microarray analysis

The fold change represents the extent of induction by exposure to 10  $\mu$ M Fura for 24 h (see text). The p-value is corrected for multiple testing using the Benjamini-Hochberg algorithm (see Materials and Methods).

| Gene Symbol | Description                                             | Fold Change | Regulation | Corrected p-value | p-value   |
|-------------|---------------------------------------------------------|-------------|------------|-------------------|-----------|
| ABCA12      | ATP-binding cassette, sub-family A (ABC1), member 12    | 3.98        | up         | 0.000047          | 0.0000005 |
| ABCB9       | ATP-binding cassette, sub-family B (MDR/TAP), member 9  | 2.58        | up         | 0.003948          | 0.0008169 |
| ABCC2       | ATP-binding cassette, sub-family C (CFTR/MRP), member 2 | 1.59        | up         | 0.000742          | 0.0000717 |
| ABHD4       | abhydrolase domain containing 4                         | 2.02        | up         | 0.000102          | 0.0000023 |
| ABHD8       | abhydrolase domain containing 8                         | 2.80        | up         | 0.000030          | 0.0000002 |
| ABTB2       | ankyrin repeat and BTB (POZ) domain containing 2        | 1.52        | up         | 0.002639          | 0.0004639 |
| ACRC        | acidic repeat containing                                | 1.68        | up         | 0.004630          | 0.0010282 |
| ACSS2       | acyl-CoA synthetase short-chain family member 2         | 1.60        | up         | 0.001742          | 0.0002599 |
| ACTA2       | actin, alpha 2, smooth muscle, aorta                    | 2.41        | up         | 0.000263          | 0.0000128 |
| ACVRL1      | activin A receptor type II-like 1                       | 2.60        | up         | 0.003060          | 0.0005714 |
| ACYP1       | acylphosphatase 1, erythrocyte (common) type            | 1.58        | up         | 0.003952          | 0.0008184 |
| ADIRF       | adipogenesis regulatory factor                          | 1.56        | up         | 0.004089          | 0.0008590 |
| ADRB2       | adrenoceptor beta 2, surface                            | 3.42        | up         | 0.000061          | 0.0000008 |
| AEN         | apoptosis enhancing nuclease                            | 1.68        | up         | 0.000288          | 0.0000151 |
| AGPAT4      | 1-acylglycerol-3-phosphate O-acyltransferase 4          | 2.69        | up         | 0.000898          | 0.0000964 |
| AGPAT9      | 1-acylglycerol-3-phosphate O-acyltransferase 9          | 1.64        | up         | 0.000784          | 0.0000784 |
| AHR         | aryl hydrocarbon receptor                               | 1.74        | up         | 0.001298          | 0.0001688 |
| AIM1L       | absent in melanoma 1-like                               | 1.81        | up         | 0.000164          | 0.0000053 |
| AJUBA       | ajuba LIM protein                                       | 1.69        | up         | 0.004296          | 0.0009259 |
| AK1         | adenylate kinase 1                                      | 1.95        | up         | 0.000130          | 0.0000036 |

|             |                                                                     |      |    |          |           |
|-------------|---------------------------------------------------------------------|------|----|----------|-----------|
| AKR1B10     | aldo-keto reductase family 1, member B10 (aldose reductase)         | 6.70 | up | 0.000022 | 0.0000001 |
| AKR1B15     | aldo-keto reductase family 1, member B15                            | 6.04 | up | 0.000259 | 0.0000125 |
| AKR1C1      | aldo-keto reductase family 1, member C1                             | 2.31 | up | 0.001859 | 0.0002856 |
| AKR1C3      | aldo-keto reductase family 1, member C3                             | 1.91 | up | 0.001267 | 0.0001628 |
| ALCAM       | activated leukocyte cell adhesion molecule                          | 1.57 | up | 0.001951 | 0.0003055 |
| ALDH3A1     | aldehyde dehydrogenase 3 family, member A1                          | 2.02 | up | 0.001249 | 0.0001590 |
| ALDH4A1     | aldehyde dehydrogenase 4 family, member A1                          | 2.56 | up | 0.000558 | 0.0000465 |
| ALOX12P2    | arachidonate 12-lipoxygenase pseudogene 2                           | 2.01 | up | 0.002014 | 0.0003187 |
| ALOX5       | arachidonate 5-lipoxygenase                                         | 1.69 | up | 0.000454 | 0.0000323 |
| AMDHD1      | amidohydrolase domain containing 1                                  | 1.56 | up | 0.002121 | 0.0003416 |
| AMOTL2      | angiomin like 2                                                     | 1.97 | up | 0.000103 | 0.0000023 |
| AMZ2        | archaelysin family metallopeptidase 2                               | 1.73 | up | 0.001129 | 0.0001367 |
| AMZ2P1      | archaelysin family metallopeptidase 2 pseudogene 1                  | 1.64 | up | 0.000160 | 0.0000051 |
| ANAPC13     | anaphase promoting complex subunit 13                               | 1.54 | up | 0.004966 | 0.0011319 |
| ANGPTL4     | angiopoietin-like 4                                                 | 3.54 | up | 0.000034 | 0.0000002 |
| ANKEF1      | ankyrin repeat and EF-hand domain containing 1                      | 1.93 | up | 0.000126 | 0.0000034 |
| ANKRA2      | ankyrin repeat, family A (RFXANK-like), 2                           | 2.10 | up | 0.000064 | 0.0000010 |
| ANKRD10     | ankyrin repeat domain 10                                            | 1.77 | up | 0.000311 | 0.0000173 |
| ANKRD19P    | ankyrin repeat domain 19, pseudogene                                | 1.56 | up | 0.001527 | 0.0002147 |
| ANKRD2      | ankyrin repeat domain 2 (stretch responsive muscle)                 | 2.73 | up | 0.001254 | 0.0001600 |
| ANKRD20A12P | ankyrin repeat domain 20 family, member A12, pseudogene             | 4.55 | up | 0.000283 | 0.0000147 |
| ANKRD29     | ankyrin repeat domain 29                                            | 1.56 | up | 0.000882 | 0.0000940 |
| ANTXR2      | anthrax toxin receptor 2                                            | 1.73 | up | 0.000210 | 0.0000085 |
| ANXA8L1     | annexin A8-like 1                                                   | 2.51 | up | 0.000280 | 0.0000143 |
| ANXA9       | annexin A9                                                          | 1.73 | up | 0.000297 | 0.0000160 |
| AP1S2       | adaptor-related protein complex 1, sigma 2 subunit                  | 1.57 | up | 0.001594 | 0.0002275 |
| APLP1       | amyloid beta (A4) precursor-like protein 1                          | 2.04 | up | 0.001394 | 0.0001872 |
| APOBEC3B    | apolipoprotein B mRNA editing enzyme, catalytic polypeptide-like 3B | 1.81 | up | 0.000017 | 0.0000000 |

|              |                                                                     |      |    |          |           |
|--------------|---------------------------------------------------------------------|------|----|----------|-----------|
| APOBEC3C     | apolipoprotein B mRNA editing enzyme, catalytic polypeptide-like 3C | 1.82 | up | 0.000147 | 0.0000045 |
| APOBEC3F     | apolipoprotein B mRNA editing enzyme, catalytic polypeptide-like 3F | 1.98 | up | 0.000850 | 0.0000882 |
| APOBEC3H     | apolipoprotein B mRNA editing enzyme, catalytic polypeptide-like 3H | 3.32 | up | 0.000301 | 0.0000164 |
| APOE         | apolipoprotein E                                                    | 1.71 | up | 0.000704 | 0.0000658 |
| AQP3         | aquaporin 3 (Gill blood group)                                      | 3.35 | up | 0.000020 | 0.0000000 |
| ARC          | activity-regulated cytoskeleton-associated protein                  | 1.96 | up | 0.000364 | 0.0000224 |
| AREG         | amphiregulin                                                        | 1.60 | up | 0.001699 | 0.0002498 |
| ARG2         | arginase 2                                                          | 3.23 | up | 0.000206 | 0.0000082 |
| ARHGAP27     | Rho GTPase activating protein 27                                    | 2.85 | up | 0.000468 | 0.0000342 |
| ARHGEF5      | Rho guanine nucleotide exchange factor (GEF) 5                      | 1.53 | up | 0.000965 | 0.0001085 |
| ARMCX3       | armadillo repeat containing, X-linked 3                             | 1.73 | up | 0.002856 | 0.0005193 |
| ARMCX6       | armadillo repeat containing, X-linked 6                             | 1.63 | up | 0.000709 | 0.0000664 |
| ARRDC4       | arrestin domain containing 4                                        | 1.55 | up | 0.000389 | 0.0000249 |
| ARTN         | artemin                                                             | 1.79 | up | 0.000509 | 0.0000400 |
| ARVCF        | armadillo repeat gene deleted in velocardiiofacial syndrome         | 1.69 | up | 0.002541 | 0.0004387 |
| ASGR1        | asialoglycoprotein receptor 1                                       | 2.62 | up | 0.000133 | 0.0000038 |
| ASTN2        | astrotactin 2                                                       | 2.12 | up | 0.000716 | 0.0000677 |
| ATF3         | activating transcription factor 3                                   | 3.49 | up | 0.000064 | 0.0000010 |
| ATG16L2      | autophagy related 16-like 2 ( <i>S. cerevisiae</i> )                | 1.66 | up | 0.001483 | 0.0002051 |
| ATG4A        | autophagy related 4A, cysteine peptidase                            | 1.60 | up | 0.002062 | 0.0003287 |
| ATL1         | atlastin GTPase 1                                                   | 1.52 | up | 0.001534 | 0.0002163 |
| ATP2C2       | ATPase, Ca <sup>++</sup> transporting, type 2C, member 2            | 1.58 | up | 0.003256 | 0.0006264 |
| ATP6V0A4     | ATPase, H <sup>+</sup> transporting, lysosomal V0 subunit a4        | 7.10 | up | 0.000436 | 0.0000299 |
| ATP6V0E2     | ATPase, H <sup>+</sup> transporting V0 subunit e2                   | 2.36 | up | 0.000041 | 0.0000003 |
| ATP6V0E2-AS1 | ATP6V0E2 antisense RNA 1                                            | 1.55 | up | 0.003532 | 0.0006997 |
| ATP6V1D      | ATPase, H <sup>+</sup> transporting, lysosomal 34kDa, V1 subunit D  | 2.04 | up | 0.000063 | 0.0000009 |
| ATP6V1F      | ATPase, H <sup>+</sup> transporting, lysosomal 14kDa, V1 subunit F  | 1.52 | up | 0.000538 | 0.0000437 |
| ATXN7L1      | ataxin 7-like 1                                                     | 2.27 | up | 0.003392 | 0.0006624 |

|          |                                                                |      |    |          |           |
|----------|----------------------------------------------------------------|------|----|----------|-----------|
| AVPI1    | arginine vasopressin-induced 1                                 | 2.97 | up | 0.000102 | 0.0000022 |
| BAD      | BCL2-associated agonist of cell death                          | 1.57 | up | 0.000184 | 0.0000066 |
| BAI2     | brain-specific angiogenesis inhibitor 2                        | 1.84 | up | 0.000100 | 0.0000021 |
| BATF2    | basic leucine zipper transcription factor, ATF-like 2          | 2.18 | up | 0.000278 | 0.0000141 |
| BAX      | BCL2-associated X protein                                      | 1.68 | up | 0.000599 | 0.0000517 |
| BBC3     | BCL2 binding component 3                                       | 2.59 | up | 0.000091 | 0.0000017 |
| BCAR3    | breast cancer anti-estrogen resistance 3                       | 1.92 | up | 0.000208 | 0.0000083 |
| BCL6     | B-cell CLL/lymphoma 6                                          | 1.90 | up | 0.000459 | 0.0000331 |
| BEST4    | bestrophin 4                                                   | 2.88 | up | 0.002364 | 0.0003952 |
| BHLHE40  | basic helix-loop-helix family, member e40                      | 1.83 | up | 0.000202 | 0.0000078 |
| BIRC2    | baculoviral IAP repeat containing 2                            | 1.54 | up | 0.000630 | 0.0000559 |
| BIRC3    | baculoviral IAP repeat containing 3                            | 2.97 | up | 0.000061 | 0.0000009 |
| BLCAP    | bladder cancer associated protein                              | 1.62 | up | 0.000563 | 0.0000471 |
| BLOC1S2  | biogenesis of lysosomal organelles complex-1, subunit 2        | 1.82 | up | 0.000120 | 0.0000031 |
| BLOC1S3  | biogenesis of lysosomal organelles complex-1, subunit 3        | 1.50 | up | 0.003397 | 0.0006635 |
| BLOC1S5  | biogenesis of lysosomal organelles complex-1, subunit 5, muted | 1.57 | up | 0.002550 | 0.0004413 |
| BLVRB    | biliverdin reductase B (flavin reductase (NADPH))              | 2.01 | up | 0.001495 | 0.0002076 |
| BMS1     | BMS1 ribosome biogenesis factor                                | 1.57 | up | 0.000047 | 0.0000005 |
| BNIP3L   | BCL2/adenovirus E1B 19kDa interacting protein 3-like           | 1.89 | up | 0.004644 | 0.0010317 |
| BTBD10   | BTB (POZ) domain containing 10                                 | 2.23 | up | 0.000082 | 0.0000015 |
| BTBD11   | BTB (POZ) domain containing 11                                 | 1.64 | up | 0.000318 | 0.0000179 |
| BTG1     | B-cell translocation gene 1, anti-proliferative                | 2.04 | up | 0.000108 | 0.0000025 |
| BTG2     | BTG family, member 2                                           | 3.06 | up | 0.000100 | 0.0000020 |
| BTG3     | BTG family, member 3                                           | 1.51 | up | 0.000896 | 0.0000961 |
| BTN2A2   | butyrophilin, subfamily 2, member A2                           | 1.63 | up | 0.001378 | 0.0001840 |
| C10orf12 | chromosome 10 open reading frame 12                            | 2.20 | up | 0.000243 | 0.0000109 |
| C10orf54 | chromosome 10 open reading frame 54                            | 2.10 | up | 0.000044 | 0.0000004 |
| C11orf52 | chromosome 11 open reading frame 52                            | 1.90 | up | 0.000850 | 0.0000883 |
| C11orf86 | chromosome 11 open reading frame 86                            | 4.44 | up | 0.002107 | 0.0003387 |

|          |                                                                |      |    |          |           |
|----------|----------------------------------------------------------------|------|----|----------|-----------|
| C12orf4  | chromosome 12 open reading frame 4                             | 1.66 | up | 0.001001 | 0.0001147 |
| C12orf5  | chromosome 12 open reading frame 5                             | 1.59 | up | 0.002273 | 0.0003737 |
| C17orf89 | chromosome 17 open reading frame 89                            | 1.67 | up | 0.004967 | 0.0011336 |
| C19orf57 | chromosome 19 open reading frame 57                            | 2.34 | up | 0.000044 | 0.0000004 |
| C1orf106 | chromosome 1 open reading frame 106                            | 2.90 | up | 0.000027 | 0.0000001 |
| C1orf116 | chromosome 1 open reading frame 116                            | 3.99 | up | 0.000090 | 0.0000017 |
| C1orf54  | chromosome 1 open reading frame 54                             | 2.43 | up | 0.000159 | 0.0000051 |
| C1QTNF6  | C1q and tumor necrosis factor related protein 6                | 1.55 | up | 0.000140 | 0.0000042 |
| C1S      | complement component 1, s subcomponent                         | 2.26 | up | 0.000431 | 0.0000293 |
| C21orf91 | chromosome 21 open reading frame 91                            | 1.78 | up | 0.000400 | 0.0000260 |
| C2CD2L   | C2CD2-like                                                     | 1.75 | up | 0.004510 | 0.0009903 |
| C2orf43  | chromosome 2 open reading frame 43                             | 1.55 | up | 0.000079 | 0.0000014 |
| C4orf47  | chromosome 4 open reading frame 47                             | 1.57 | up | 0.002746 | 0.0004895 |
| C5orf42  | chromosome 5 open reading frame 42                             | 1.83 | up | 0.004916 | 0.0011151 |
| C6orf226 | chromosome 6 open reading frame 226                            | 1.90 | up | 0.000253 | 0.0000119 |
| C8orf44  | chromosome 8 open reading frame 44                             | 2.02 | up | 0.000043 | 0.0000004 |
| CA2      | carbonic anhydrase II                                          | 2.49 | up | 0.000167 | 0.0000056 |
| CACNA1A  | calcium channel, voltage-dependent, P/Q type, alpha 1A subunit | 1.74 | up | 0.000487 | 0.0000368 |
| CALB2    | calbindin 2                                                    | 1.69 | up | 0.000477 | 0.0000350 |
| CALCOCO2 | calcium binding and coiled-coil domain 2                       | 1.51 | up | 0.000119 | 0.0000030 |
| CALHM3   | calcium homeostasis modulator 3                                | 2.41 | up | 0.000939 | 0.0001039 |
| CAMK2B   | calcium/calmodulin-dependent protein kinase II beta            | 4.60 | up | 0.002364 | 0.0003954 |
| CAPG     | capping protein (actin filament), gelsolin-like                | 1.62 | up | 0.001668 | 0.0002438 |
| CAPN13   | calpain 13                                                     | 1.58 | up | 0.000915 | 0.0000992 |
| CARHSP1  | calcium regulated heat stable protein 1, 24kDa                 | 1.52 | up | 0.000947 | 0.0001051 |
| CASP10   | caspase 10, apoptosis-related cysteine peptidase               | 1.69 | up | 0.003055 | 0.0005695 |
| CASP4    | caspase 4, apoptosis-related cysteine peptidase                | 1.92 | up | 0.000039 | 0.0000003 |
| CASP5    | caspase 5, apoptosis-related cysteine peptidase                | 2.11 | up | 0.000497 | 0.0000382 |
| CAST     | calpastatin                                                    | 1.68 | up | 0.000029 | 0.0000002 |

|          |                                                                              |      |    |          |           |
|----------|------------------------------------------------------------------------------|------|----|----------|-----------|
| CATSPER1 | cation channel, sperm associated 1                                           | 1.97 | up | 0.001743 | 0.0002601 |
| CBR3     | carbonyl reductase 3                                                         | 1.89 | up | 0.003410 | 0.0006666 |
| CBS      | cystathionine-beta-synthase                                                  | 3.30 | up | 0.000200 | 0.0000077 |
| CCDC90B  | coiled-coil domain containing 90B                                            | 1.50 | up | 0.000250 | 0.0000116 |
| CCDC96   | coiled-coil domain containing 96                                             | 1.62 | up | 0.000102 | 0.0000022 |
| CCL26    | chemokine (C-C motif) ligand 26                                              | 4.94 | up | 0.000241 | 0.0000107 |
| CCL3     | chemokine (C-C motif) ligand 3                                               | 2.00 | up | 0.001067 | 0.0001258 |
| CCND3    | cyclin D3                                                                    | 2.23 | up | 0.000014 | 0.0000000 |
| CCNE1    | cyclin E1                                                                    | 1.69 | up | 0.001508 | 0.0002109 |
| CCNE2    | cyclin E2                                                                    | 3.06 | up | 0.001859 | 0.0002858 |
| CCNG2    | cyclin G2                                                                    | 2.17 | up | 0.004254 | 0.0009118 |
| CCRL2    | chemokine (C-C motif) receptor-like 2                                        | 5.08 | up | 0.000053 | 0.0000006 |
| CD274    | CD274 molecule                                                               | 2.86 | up | 0.000116 | 0.0000029 |
| CD33     | CD33 molecule                                                                | 1.51 | up | 0.000590 | 0.0000507 |
| CD47     | CD47 molecule                                                                | 1.62 | up | 0.000124 | 0.0000033 |
| CD55     | CD55 molecule, decay accelerating factor for complement (Cromer blood group) | 1.88 | up | 0.000253 | 0.0000118 |
| CD68     | CD68 molecule                                                                | 2.27 | up | 0.000029 | 0.0000002 |
| CD79B    | CD79b molecule, immunoglobulin-associated beta                               | 5.64 | up | 0.003888 | 0.0007965 |
| CD82     | CD82 molecule                                                                | 3.54 | up | 0.000038 | 0.0000003 |
| CD83     | CD83 molecule                                                                | 1.85 | up | 0.000495 | 0.0000380 |
| CDA      | cytidine deaminase                                                           | 1.93 | up | 0.000022 | 0.0000001 |
| CDC42BPG | CDC42 binding protein kinase gamma (DMPK-like)                               | 2.12 | up | 0.002425 | 0.0004099 |
| CDCA5    | cell division cycle associated 5                                             | 1.52 | up | 0.000271 | 0.0000135 |
| CDCP1    | CUB domain containing protein 1                                              | 1.82 | up | 0.000044 | 0.0000004 |
| CDH1     | cadherin 1, type 1, E-cadherin (epithelial)                                  | 1.54 | up | 0.001195 | 0.0001480 |
| CDIP1    | cell death-inducing p53 target 1                                             | 2.60 | up | 0.001805 | 0.0002737 |
| CDK2     | cyclin-dependent kinase 2                                                    | 1.55 | up | 0.000389 | 0.0000249 |
| CDKN1A   | cyclin-dependent kinase inhibitor 1A (p21, Cip1)                             | 3.83 | up | 0.000056 | 0.0000007 |
| CDKN1C   | cyclin-dependent kinase inhibitor 1C (p57, Kip2)                             | 2.13 | up | 0.000054 | 0.0000006 |

|          |                                                                                                                                |       |    |          |           |
|----------|--------------------------------------------------------------------------------------------------------------------------------|-------|----|----------|-----------|
| CDKN2C   | cyclin-dependent kinase inhibitor 2C (p18, inhibits CDK4)                                                                      | 1.70  | up | 0.000106 | 0.0000025 |
| CDKN2D   | cyclin-dependent kinase inhibitor 2D (p19, inhibits CDK4)                                                                      | 1.68  | up | 0.001232 | 0.0001554 |
| CEACAM1  | carcinoembryonic antigen-related cell adhesion molecule 1 (biliary glycoprotein)                                               | 13.86 | up | 0.000056 | 0.0000007 |
| CENPP    | centromere protein P                                                                                                           | 1.73  | up | 0.000938 | 0.0001037 |
| CENPQ    | centromere protein Q                                                                                                           | 1.87  | up | 0.000102 | 0.0000022 |
| CENPU    | centromere protein U                                                                                                           | 1.51  | up | 0.000614 | 0.0000536 |
| CERS6    | ceramide synthase 6                                                                                                            | 1.56  | up | 0.002558 | 0.0004432 |
| CGB      | chorionic gonadotropin, beta polypeptide                                                                                       | 2.16  | up | 0.000509 | 0.0000400 |
| CGRRF1   | cell growth regulator with ring finger domain 1                                                                                | 1.69  | up | 0.003010 | 0.0005581 |
| CHIC2    | cysteine-rich hydrophobic domain 2                                                                                             | 1.97  | up | 0.000164 | 0.0000054 |
| CHM      | choroideremia (Rab escort protein 1)                                                                                           | 2.61  | up | 0.003329 | 0.0006472 |
| CHMP1B   | charged multivesicular body protein 1B                                                                                         | 1.56  | up | 0.000850 | 0.0000883 |
| CHRD     | chordin                                                                                                                        | 1.81  | up | 0.000742 | 0.0000718 |
| CHRFAM7A | CHRNA7 (cholinergic receptor, nicotinic, alpha 7, exons 5-10) and FAM7A (family with sequence similarity 7A, exons A-E) fusion | 2.54  | up | 0.004040 | 0.0008458 |
| CHRNA7   | cholinergic receptor, nicotinic, alpha 7 (neuronal)                                                                            | 2.42  | up | 0.000074 | 0.0000012 |
| CHRNB1   | cholinergic receptor, nicotinic, beta 1 (muscle)                                                                               | 2.07  | up | 0.000278 | 0.0000141 |
| CHST12   | carbohydrate (chondroitin 4) sulfotransferase 12                                                                               | 1.52  | up | 0.001761 | 0.0002639 |
| CHST6    | carbohydrate (N-acetylglucosamine 6-O) sulfotransferase 6                                                                      | 1.90  | up | 0.000098 | 0.0000020 |
| CHST7    | carbohydrate (N-acetylglucosamine 6-O) sulfotransferase 7                                                                      | 1.59  | up | 0.001570 | 0.0002225 |
| CITED4   | Cbp/p300-interacting transactivator, with Glu/Asp-rich carboxy-terminal domain, 4                                              | 1.70  | up | 0.000060 | 0.0000008 |
| CLDN4    | claudin 4                                                                                                                      | 1.72  | up | 0.000551 | 0.0000456 |
| CLEC16A  | C-type lectin domain family 16, member A                                                                                       | 2.71  | up | 0.002145 | 0.0003466 |
| CLIC3    | chloride intracellular channel 3                                                                                               | 1.52  | up | 0.002290 | 0.0003775 |
| CLIC4    | chloride intracellular channel 4                                                                                               | 1.66  | up | 0.000127 | 0.0000035 |
| CLIC5    | chloride intracellular channel 5                                                                                               | 3.33  | up | 0.001130 | 0.0001370 |
| CLK4     | CDC-like kinase 4                                                                                                              | 1.53  | up | 0.002288 | 0.0003769 |
| CLPB     | ClpB caseinolytic peptidase B homolog (E. coli)                                                                                | 1.58  | up | 0.000560 | 0.0000467 |

|            |                                                           |      |    |          |           |
|------------|-----------------------------------------------------------|------|----|----------|-----------|
| CMTM3      | CKLF-like MARVEL transmembrane domain containing 3        | 1.72 | up | 0.000191 | 0.0000071 |
| CNN1       | calponin 1, basic, smooth muscle                          | 6.13 | up | 0.000034 | 0.0000002 |
| CNOT1      | CCR4-NOT transcription complex, subunit 1                 | 1.54 | up | 0.001336 | 0.0001755 |
| CNST       | consortin, connexin sorting protein                       | 1.57 | up | 0.000037 | 0.0000002 |
| COBLL1     | cordons-bleu WH2 repeat protein-like 1                    | 1.84 | up | 0.000289 | 0.0000152 |
| COL16A1    | collagen, type XVI, alpha 1                               | 2.18 | up | 0.001235 | 0.0001559 |
| COL4A6     | collagen, type IV, alpha 6                                | 1.55 | up | 0.000598 | 0.0000516 |
| COL9A3     | collagen, type IX, alpha 3                                | 1.75 | up | 0.000442 | 0.0000307 |
| COQ10B     | coenzyme Q10 homolog B ( <i>S. cerevisiae</i> )           | 1.52 | up | 0.000159 | 0.0000050 |
| CORO2A     | coronin, actin binding protein, 2A                        | 1.71 | up | 0.004989 | 0.0011407 |
| CORO6      | coronin 6                                                 | 1.95 | up | 0.000528 | 0.0000423 |
| CPE        | carboxypeptidase E                                        | 2.00 | up | 0.000022 | 0.0000001 |
| CPNE8      | copine VIII                                               | 1.58 | up | 0.001505 | 0.0002102 |
| CREB3      | cAMP responsive element binding protein 3                 | 1.91 | up | 0.001237 | 0.0001565 |
| CREB3L3    | cAMP responsive element binding protein 3-like 3          | 1.88 | up | 0.000754 | 0.0000737 |
| CRELD2     | cysteine-rich with EGF-like domains 2                     | 1.62 | up | 0.000347 | 0.0000209 |
| CRIP1      | cysteine-rich protein 1 (intestinal)                      | 1.79 | up | 0.000163 | 0.0000053 |
| CRIP2      | cysteine-rich protein 2                                   | 2.08 | up | 0.000170 | 0.0000058 |
| CRIPT      | cysteine-rich PDZ-binding protein                         | 1.60 | up | 0.000416 | 0.0000277 |
| CRISPLD2   | cysteine-rich secretory protein LCCL domain containing 2  | 2.35 | up | 0.000063 | 0.0000009 |
| CRLF1      | cytokine receptor-like factor 1                           | 1.65 | up | 0.001293 | 0.0001675 |
| CSF1R      | colony stimulating factor 1 receptor                      | 2.04 | up | 0.000416 | 0.0000276 |
| CSF2       | colony stimulating factor 2 (granulocyte-macrophage)      | 5.56 | up | 0.001739 | 0.0002587 |
| CSGALNACT2 | chondroitin sulfate N-acetylgalactosaminyltransferase 2   | 2.27 | up | 0.004438 | 0.0009687 |
| CSRNP1     | cysteine-serine-rich nuclear protein 1                    | 2.88 | up | 0.000046 | 0.0000005 |
| CST6       | cystatin E/M                                              | 2.11 | up | 0.000040 | 0.0000003 |
| CSTF3      | cleavage stimulation factor, 3' pre-RNA, subunit 3, 77kDa | 1.59 | up | 0.000209 | 0.0000085 |
| CTGF       | connective tissue growth factor                           | 2.96 | up | 0.001055 | 0.0001237 |
| CTSD       | cathepsin D                                               | 1.65 | up | 0.000247 | 0.0000113 |
| CTSK       | cathepsin K                                               | 1.72 | up | 0.001399 | 0.0001889 |



|          |                                                         |      |    |          |           |
|----------|---------------------------------------------------------|------|----|----------|-----------|
| CTSV     | cathepsin V                                             | 1.86 | up | 0.001646 | 0.0002379 |
| CUL4B    | cullin 4B                                               | 1.61 | up | 0.000046 | 0.0000005 |
| CXCL16   | chemokine (C-X-C motif) ligand 16                       | 1.54 | up | 0.002189 | 0.0003560 |
| CXCR4    | chemokine (C-X-C motif) receptor 4                      | 3.98 | up | 0.000039 | 0.0000003 |
| CXorf40B | chromosome X open reading frame 40B                     | 1.60 | up | 0.000329 | 0.0000191 |
| CXorf57  | chromosome X open reading frame 57                      | 1.61 | up | 0.000226 | 0.0000096 |
| CYB5R1   | cytochrome b5 reductase 1                               | 1.66 | up | 0.002679 | 0.0004731 |
| CYFIP2   | cytoplasmic FMR1 interacting protein 2                  | 2.03 | up | 0.001676 | 0.0002454 |
| CYHR1    | cysteine/histidine-rich 1                               | 1.79 | up | 0.000197 | 0.0000075 |
| CYP2S1   | cytochrome P450, family 2, subfamily S, polypeptide 1   | 1.69 | up | 0.000834 | 0.0000850 |
| CYP4F11  | cytochrome P450, family 4, subfamily F, polypeptide 11  | 2.16 | up | 0.000444 | 0.0000310 |
| CYP4F12  | cytochrome P450, family 4, subfamily F, polypeptide 12  | 2.56 | up | 0.001262 | 0.0001615 |
| CYR61    | cysteine-rich, angiogenic inducer, 61                   | 3.68 | up | 0.000109 | 0.0000026 |
| CYSRT1   | cysteine-rich tail protein 1                            | 3.33 | up | 0.000029 | 0.0000002 |
| CYSTM1   | cysteine-rich transmembrane module containing 1         | 1.63 | up | 0.000441 | 0.0000305 |
| CYTH4    | cytohesin 4                                             | 3.28 | up | 0.000086 | 0.0000016 |
| DACT3    | dishevelled-binding antagonist of beta-catenin 3        | 2.10 | up | 0.000168 | 0.0000057 |
| DAPP1    | dual adaptor of phosphotyrosine and 3-phosphoinositides | 8.72 | up | 0.000054 | 0.0000007 |
| DBR1     | debranching RNA lariats 1                               | 1.51 | up | 0.000206 | 0.0000082 |
| DDB2     | damage-specific DNA binding protein 2, 48kDa            | 2.67 | up | 0.000311 | 0.0000173 |
| DDIAS    | DNA damage-induced apoptosis suppressor                 | 1.69 | up | 0.000525 | 0.0000419 |
| DDIT3    | DNA-damage-inducible transcript 3                       | 1.71 | up | 0.001292 | 0.0001674 |
| DEF8     | differentially expressed in FDCP 8 homolog (mouse)      | 1.77 | up | 0.001046 | 0.0001220 |
| DENND2A  | DENN/MADD domain containing 2A                          | 2.36 | up | 0.000879 | 0.0000934 |
| DENND2C  | DENN/MADD domain containing 2C                          | 1.79 | up | 0.000235 | 0.0000103 |
| DENND3   | DENN/MADD domain containing 3                           | 1.52 | up | 0.000621 | 0.0000546 |
| DES      | desmin                                                  | 1.53 | up | 0.001073 | 0.0001270 |
| DGKA     | diacylglycerol kinase, alpha 80kDa                      | 2.56 | up | 0.000501 | 0.0000387 |
| DHRS11   | dehydrogenase/reductase (SDR family) member 11          | 1.77 | up | 0.003168 | 0.0006002 |
| DHRS13   | dehydrogenase/reductase (SDR family) member 13          | 1.87 | up | 0.001244 | 0.0001581 |

|         |                                                                  |       |    |          |           |
|---------|------------------------------------------------------------------|-------|----|----------|-----------|
| DHRS7   | dehydrogenase/reductase (SDR family) member 7                    | 1.59  | up | 0.000098 | 0.0000020 |
| DISP1   | dispatched homolog 1 (Drosophila)                                | 2.19  | up | 0.000713 | 0.0000672 |
| DISP2   | dispatched homolog 2 (Drosophila)                                | 2.23  | up | 0.000054 | 0.0000006 |
| DKK1    | dickkopf WNT signaling pathway inhibitor 1                       | 1.63  | up | 0.001371 | 0.0001826 |
| DLK2    | delta-like 2 homolog (Drosophila)                                | 1.73  | up | 0.000446 | 0.0000312 |
| DLX2    | distal-less homeobox 2                                           | 1.73  | up | 0.000539 | 0.0000439 |
| DLX4    | distal-less homeobox 4                                           | 2.00  | up | 0.000839 | 0.0000859 |
| DMPK    | dystrophia myotonica-protein kinase                              | 1.66  | up | 0.003888 | 0.0007962 |
| DMTF1   | cyclin D binding myb-like transcription factor 1                 | 1.50  | up | 0.003532 | 0.0006999 |
| DNAJB5  | DnaJ (Hsp40) homolog, subfamily B, member 5                      | 1.59  | up | 0.002145 | 0.0003468 |
| DNAJC1  | DnaJ (Hsp40) homolog, subfamily C, member 1                      | 1.62  | up | 0.000958 | 0.0001072 |
| DNAJC18 | DnaJ (Hsp40) homolog, subfamily C, member 18                     | 2.00  | up | 0.001904 | 0.0002956 |
| DOK7    | docking protein 7                                                | 3.99  | up | 0.000551 | 0.0000456 |
| DPF1    | D4, zinc and double PHD fingers family 1                         | 1.64  | up | 0.000269 | 0.0000133 |
| DPYSL4  | dihydropyrimidinase-like 4                                       | 2.66  | up | 0.000103 | 0.0000023 |
| DRAM1   | DNA-damage regulated autophagy modulator 1                       | 2.35  | up | 0.000290 | 0.0000153 |
| DRAXIN  | dorsal inhibitory axon guidance protein                          | 3.45  | up | 0.000646 | 0.0000583 |
| DRICH1  | aspartate-rich 1                                                 | 1.52  | up | 0.003831 | 0.0007793 |
| DSG2    | desmoglein 2                                                     | 1.57  | up | 0.000503 | 0.0000391 |
| DUSP1   | dual specificity phosphatase 1                                   | 1.54  | up | 0.000243 | 0.0000109 |
| DUSP13  | dual specificity phosphatase 13                                  | 2.17  | up | 0.000132 | 0.0000037 |
| DUSP14  | dual specificity phosphatase 14                                  | 2.42  | up | 0.000133 | 0.0000038 |
| DUSP4   | dual specificity phosphatase 4                                   | 1.74  | up | 0.000074 | 0.0000012 |
| DUSP5   | dual specificity phosphatase 5                                   | 2.40  | up | 0.000020 | 0.0000000 |
| DYRK3   | dual-specificity tyrosine-(Y)-phosphorylation regulated kinase 3 | 1.62  | up | 0.000342 | 0.0000204 |
| E2F7    | E2F transcription factor 7                                       | 2.24  | up | 0.000264 | 0.0000129 |
| EBI3    | Epstein-Barr virus induced 3                                     | 4.18  | up | 0.000089 | 0.0000017 |
| ECM1    | extracellular matrix protein 1                                   | 4.17  | up | 0.000047 | 0.0000005 |
| EDN2    | endothelin 2                                                     | 12.48 | up | 0.000253 | 0.0000119 |

|        |                                                                           |      |    |          |           |
|--------|---------------------------------------------------------------------------|------|----|----------|-----------|
| EDRF1  | erythroid differentiation regulatory factor 1                             | 1.95 | up | 0.003508 | 0.0006915 |
| EFEMP2 | EGF containing fibulin-like extracellular matrix protein 2                | 1.89 | up | 0.003199 | 0.0006098 |
| EFNB1  | ephrin-B1                                                                 | 1.96 | up | 0.000858 | 0.0000897 |
| EFR3B  | EFR3 homolog B ( <i>S. cerevisiae</i> )                                   | 2.19 | up | 0.000528 | 0.0000423 |
| EGR2   | early growth response 2                                                   | 3.68 | up | 0.000477 | 0.0000353 |
| EGR4   | early growth response 4                                                   | 2.00 | up | 0.003663 | 0.0007348 |
| EHD2   | EH-domain containing 2                                                    | 1.50 | up | 0.000713 | 0.0000671 |
| ELF3   | E74-like factor 3 (ets domain transcription factor, epithelial-specific ) | 1.87 | up | 0.000541 | 0.0000442 |
| ELK3   | ELK3, ETS-domain protein (SRF accessory protein 2)                        | 2.29 | up | 0.000684 | 0.0000633 |
| EMC7   | ER membrane protein complex subunit 7                                     | 1.62 | up | 0.001693 | 0.0002487 |
| EMX1   | empty spiracles homeobox 1                                                | 1.53 | up | 0.001410 | 0.0001913 |
| ENHO   | energy homeostasis associated                                             | 1.89 | up | 0.000343 | 0.0000204 |
| ENPP4  | ectonucleotide pyrophosphatase/phosphodiesterase 4 (putative)             | 1.57 | up | 0.003085 | 0.0005780 |
| ENSA   | endosulfine alpha                                                         | 1.79 | up | 0.000672 | 0.0000617 |
| EPAS1  | endothelial PAS domain protein 1                                          | 1.97 | up | 0.000040 | 0.0000003 |
| EPHA2  | EPH receptor A2                                                           | 2.36 | up | 0.000338 | 0.0000200 |
| EPHB3  | EPH receptor B3                                                           | 2.11 | up | 0.001199 | 0.0001492 |
| EPPK1  | epiplakin 1                                                               | 2.54 | up | 0.000135 | 0.0000039 |
| EPS8L1 | EPS8-like 1                                                               | 1.54 | up | 0.001897 | 0.0002941 |
| EPS8L2 | EPS8-like 2                                                               | 2.23 | up | 0.000446 | 0.0000312 |
| ERAP2  | endoplasmic reticulum aminopeptidase 2                                    | 2.24 | up | 0.000492 | 0.0000375 |
| ERBB3  | v-erb-b2 avian erythroblastic leukemia viral oncogene homolog 3           | 1.76 | up | 0.000283 | 0.0000147 |
| ERICH2 | glutamate-rich 2                                                          | 3.26 | up | 0.000047 | 0.0000005 |
| ERMP1  | endoplasmic reticulum metallopeptidase 1                                  | 1.58 | up | 0.001242 | 0.0001575 |
| ESAM   | endothelial cell adhesion molecule                                        | 2.08 | up | 0.000152 | 0.0000048 |
| ESPNL  | espin-like                                                                | 2.60 | up | 0.000165 | 0.0000054 |
| ETNK2  | ethanolamine kinase 2                                                     | 1.59 | up | 0.001500 | 0.0002089 |
| EXO1   | exonuclease 1                                                             | 1.74 | up | 0.000180 | 0.0000064 |

|          |                                                        |      |    |          |           |
|----------|--------------------------------------------------------|------|----|----------|-----------|
| EXT1     | exostosin glycosyltransferase 1                        | 1.66 | up | 0.002299 | 0.0003801 |
| F3       | coagulation factor III (thromboplastin, tissue factor) | 1.76 | up | 0.000127 | 0.0000035 |
| FA2H     | fatty acid 2-hydroxylase                               | 2.07 | up | 0.000102 | 0.0000021 |
| FAAH2    | fatty acid amide hydrolase 2                           | 1.54 | up | 0.000400 | 0.0000260 |
| FAAHP1   | fatty acid amide hydrolase pseudogene 1                | 3.88 | up | 0.000047 | 0.0000005 |
| FAM105A  | family with sequence similarity 105, member A          | 1.77 | up | 0.000745 | 0.0000725 |
| FAM110C  | family with sequence similarity 110, member C          | 2.40 | up | 0.000027 | 0.0000001 |
| FAM111A  | family with sequence similarity 111, member A          | 2.34 | up | 0.000441 | 0.0000305 |
| FAM122B  | family with sequence similarity 122B                   | 1.65 | up | 0.002226 | 0.0003640 |
| FAM126A  | family with sequence similarity 126, member A          | 2.31 | up | 0.003928 | 0.0008107 |
| FAM129A  | family with sequence similarity 129, member A          | 2.49 | up | 0.000095 | 0.0000019 |
| FAM174A  | family with sequence similarity 174, member A          | 1.58 | up | 0.003252 | 0.0006231 |
| FAM189A2 | family with sequence similarity 189, member A2         | 2.83 | up | 0.000481 | 0.0000358 |
| FAM199X  | family with sequence similarity 199, X-linked          | 1.61 | up | 0.000150 | 0.0000046 |
| FAM210B  | family with sequence similarity 210, member B          | 2.03 | up | 0.000205 | 0.0000081 |
| FAM212B  | family with sequence similarity 212, member B          | 3.34 | up | 0.000079 | 0.0000014 |
| FAM214A  | family with sequence similarity 214, member A          | 2.70 | up | 0.000040 | 0.0000003 |
| FAM214B  | family with sequence similarity 214, member B          | 1.72 | up | 0.002834 | 0.0005132 |
| FAM25A   | family with sequence similarity 25, member A           | 3.01 | up | 0.000024 | 0.0000001 |
| FAM27C   | family with sequence similarity 27, member C           | 1.86 | up | 0.000482 | 0.0000360 |
| FAM46B   | family with sequence similarity 46, member B           | 2.96 | up | 0.000548 | 0.0000452 |
| FAM46C   | family with sequence similarity 46, member C           | 1.64 | up | 0.004263 | 0.0009148 |
| FAM71E1  | family with sequence similarity 71, member E1          | 1.52 | up | 0.000903 | 0.0000972 |
| FAM83E   | family with sequence similarity 83, member E           | 2.56 | up | 0.000217 | 0.0000089 |
| FAM84B   | family with sequence similarity 84, member B           | 1.73 | up | 0.000335 | 0.0000197 |
| FAM8A1   | family with sequence similarity 8, member A1           | 1.70 | up | 0.000104 | 0.0000024 |
| FAM92B   | family with sequence similarity 92, member B           | 5.84 | up | 0.000112 | 0.0000027 |
| FAM98C   | family with sequence similarity 98, member C           | 1.57 | up | 0.000806 | 0.0000813 |
| FANCB    | Fanconi anemia, complementation group B                | 1.62 | up | 0.001659 | 0.0002413 |
| FAS      | Fas cell surface death receptor                        | 3.97 | up | 0.000215 | 0.0000088 |

|         |                                                                                 |      |    |          |           |
|---------|---------------------------------------------------------------------------------|------|----|----------|-----------|
| FBLIM1  | filamin binding LIM protein 1                                                   | 3.98 | up | 0.003145 | 0.0005935 |
| FBLN1   | fibulin 1                                                                       | 1.89 | up | 0.000114 | 0.0000028 |
| FBLN5   | fibulin 5                                                                       | 2.10 | up | 0.001682 | 0.0002464 |
| FBXO2   | F-box protein 2                                                                 | 1.63 | up | 0.000631 | 0.0000560 |
| FBXO22  | F-box protein 22                                                                | 1.53 | up | 0.001651 | 0.0002391 |
| FDXR    | ferredoxin reductase                                                            | 2.27 | up | 0.000178 | 0.0000063 |
| FER1L4  | fer-1-like 4 (C. elegans), pseudogene                                           | 2.29 | up | 0.000926 | 0.0001014 |
| FGD6    | FYVE, RhoGEF and PH domain containing 6                                         | 2.28 | up | 0.000227 | 0.0000097 |
| FGFR1OP | FGFR1 oncogene partner                                                          | 1.51 | up | 0.002066 | 0.0003303 |
| FHL2    | four and a half LIM domains 2                                                   | 2.80 | up | 0.000035 | 0.0000002 |
| FICD    | FIC domain containing                                                           | 1.55 | up | 0.000684 | 0.0000633 |
| FIGF    | c-fos induced growth factor (vascular endothelial growth factor D)              | 1.93 | up | 0.001513 | 0.0002119 |
| FLNC    | filamin C, gamma                                                                | 1.76 | up | 0.001098 | 0.0001310 |
| FLT3LG  | fms-related tyrosine kinase 3 ligand                                            | 1.96 | up | 0.000750 | 0.0000731 |
| FOLR1   | folate receptor 1 (adult)                                                       | 1.75 | up | 0.000548 | 0.0000451 |
| FOSL1   | FOS-like antigen 1                                                              | 1.65 | up | 0.000083 | 0.0000015 |
| FOSL2   | FOS-like antigen 2                                                              | 1.92 | up | 0.000350 | 0.0000212 |
| FOXA1   | forkhead box A1                                                                 | 1.76 | up | 0.000108 | 0.0000025 |
| FOXD1   | forkhead box D1                                                                 | 1.64 | up | 0.000742 | 0.0000716 |
| FOXP1   | forkhead box P1                                                                 | 2.39 | up | 0.000402 | 0.0000263 |
| FOXQ1   | forkhead box Q1                                                                 | 2.19 | up | 0.003296 | 0.0006373 |
| FRS2    | fibroblast growth factor receptor substrate 2                                   | 1.58 | up | 0.003260 | 0.0006275 |
| FRZB    | frizzled-related protein                                                        | 2.55 | up | 0.000566 | 0.0000475 |
| FST     | follistatin                                                                     | 4.02 | up | 0.000102 | 0.0000022 |
| FUT3    | fucosyltransferase 3 (galactoside 3(4)-L-fucosyltransferase, Lewis blood group) | 3.30 | up | 0.000042 | 0.0000004 |
| FXYD3   | FXYD domain containing ion transport regulator 3                                | 5.10 | up | 0.000052 | 0.0000006 |
| FXYD6   | FXYD domain containing ion transport regulator 6                                | 1.78 | up | 0.003533 | 0.0007013 |
| GABARAP | GABA(A) receptor-associated protein                                             | 1.53 | up | 0.003009 | 0.0005578 |

|           |                                                          |      |    |          |           |
|-----------|----------------------------------------------------------|------|----|----------|-----------|
| GABARAPL1 | GABA(A) receptor-associated protein like 1               | 1.68 | up | 0.002189 | 0.0003560 |
| GAD1      | glutamate decarboxylase 1 (brain, 67kDa)                 | 1.84 | up | 0.000501 | 0.0000388 |
| GADD45A   | growth arrest and DNA-damage-inducible, alpha            | 2.06 | up | 0.000269 | 0.0000134 |
| GALNT5    | polypeptide N-acetylgalactosaminyltransferase 5          | 2.96 | up | 0.000039 | 0.0000003 |
| GAST      | gastrin                                                  | 4.28 | up | 0.000102 | 0.0000021 |
| GATA2     | GATA binding protein 2                                   | 1.82 | up | 0.000431 | 0.0000293 |
| GBE1      | glucan (1,4-alpha-), branching enzyme 1                  | 1.73 | up | 0.000069 | 0.0000011 |
| GBX2      | gastrulation brain homeobox 2                            | 2.31 | up | 0.000544 | 0.0000445 |
| GCH1      | GTP cyclohydrolase 1                                     | 2.28 | up | 0.000051 | 0.0000006 |
| GCHFR     | GTP cyclohydrolase I feedback regulator                  | 2.12 | up | 0.000253 | 0.0000118 |
| GDA       | guanine deaminase                                        | 1.68 | up | 0.000184 | 0.0000066 |
| GDAP2     | ganglioside induced differentiation associated protein 2 | 1.63 | up | 0.000127 | 0.0000035 |
| GDI1      | GDP dissociation inhibitor 1                             | 1.60 | up | 0.003122 | 0.0005880 |
| GEM       | GTP binding protein overexpressed in skeletal muscle     | 1.66 | up | 0.000740 | 0.0000712 |
| GFI1      | growth factor independent 1 transcription repressor      | 1.73 | up | 0.000093 | 0.0000018 |
| GFOD1     | glucose-fructose oxidoreductase domain containing 1      | 1.72 | up | 0.002689 | 0.0004757 |
| GGCT      | gamma-glutamylcyclotransferase                           | 1.56 | up | 0.002013 | 0.0003183 |
| GGT1      | gamma-glutamyltransferase 1                              | 2.48 | up | 0.000289 | 0.0000152 |
| GGT3P     | gamma-glutamyltransferase 3 pseudogene                   | 2.12 | up | 0.000312 | 0.0000174 |
| GGTLC1    | gamma-glutamyltransferase light chain 1                  | 3.12 | up | 0.000040 | 0.0000003 |
| GGTLC2    | gamma-glutamyltransferase light chain 2                  | 2.59 | up | 0.000254 | 0.0000121 |
| GJB4      | gap junction protein, beta 4, 30.3kDa                    | 3.65 | up | 0.000022 | 0.0000001 |
| GJB5      | gap junction protein, beta 5, 31.1kDa                    | 2.70 | up | 0.000061 | 0.0000008 |
| GLRX      | glutaredoxin (thioltransferase)                          | 1.54 | up | 0.000476 | 0.0000349 |
| GLRX2     | glutaredoxin 2                                           | 1.68 | up | 0.000623 | 0.0000547 |
| GLS       | glutaminase                                              | 2.44 | up | 0.000184 | 0.0000067 |
| GLTP      | glycolipid transfer protein                              | 1.58 | up | 0.001780 | 0.0002681 |
| GM2A      | GM2 ganglioside activator                                | 1.88 | up | 0.000990 | 0.0001128 |
| GNAS      | GNAS complex locus                                       | 1.52 | up | 0.000206 | 0.0000082 |

|          |                                                                                          |      |    |          |           |
|----------|------------------------------------------------------------------------------------------|------|----|----------|-----------|
| GNGT1    | guanine nucleotide binding protein (G protein), gamma transducing activity polypeptide 1 | 2.34 | up | 0.000074 | 0.0000012 |
| GP1BB    | glycoprotein Ib (platelet), beta polypeptide                                             | 1.87 | up | 0.000462 | 0.0000335 |
| GPATCH11 | G patch domain containing 11                                                             | 1.52 | up | 0.000576 | 0.0000487 |
| GPM6A    | glycoprotein M6A                                                                         | 1.68 | up | 0.003010 | 0.0005585 |
| GPR124   | G protein-coupled receptor 124                                                           | 1.58 | up | 0.002998 | 0.0005553 |
| GPR137   | G protein-coupled receptor 137                                                           | 1.58 | up | 0.002380 | 0.0003986 |
| GPR162   | G protein-coupled receptor 162                                                           | 1.97 | up | 0.002007 | 0.0003170 |
| GPR35    | G protein-coupled receptor 35                                                            | 2.27 | up | 0.001805 | 0.0002731 |
| GPR56    | G protein-coupled receptor 56                                                            | 2.30 | up | 0.000068 | 0.0000010 |
| GPR87    | G protein-coupled receptor 87                                                            | 4.47 | up | 0.000014 | 0.0000000 |
| GPRC5A   | G protein-coupled receptor, class C, group 5, member A                                   | 2.17 | up | 0.000294 | 0.0000157 |
| GPX1     | glutathione peroxidase 1                                                                 | 1.65 | up | 0.000812 | 0.0000823 |
| GRAMD1B  | GRAM domain containing 1B                                                                | 2.57 | up | 0.002219 | 0.0003622 |
| GRAMD3   | GRAM domain containing 3                                                                 | 1.69 | up | 0.001630 | 0.0002351 |
| GRB7     | growth factor receptor-bound protein 7                                                   | 2.22 | up | 0.000147 | 0.0000045 |
| GREB1    | growth regulation by estrogen in breast cancer 1                                         | 1.72 | up | 0.003173 | 0.0006018 |
| GRIN2C   | glutamate receptor, ionotropic, N-methyl D-aspartate 2C                                  | 1.81 | up | 0.004894 | 0.0011073 |
| GSE1     | Gse1 coiled-coil protein                                                                 | 1.74 | up | 0.004492 | 0.0009849 |
| GSN      | gelsolin                                                                                 | 1.76 | up | 0.000836 | 0.0000853 |
| GSTT2    | glutathione S-transferase theta 2                                                        | 1.82 | up | 0.001871 | 0.0002886 |
| GSTT2B   | glutathione S-transferase theta 2B (gene/pseudogene)                                     | 1.91 | up | 0.000103 | 0.0000023 |
| H19      | H19, imprinted maternally expressed transcript (non-protein coding)                      | 3.04 | up | 0.000116 | 0.0000029 |
| HAPLN3   | hyaluronan and proteoglycan link protein 3                                               | 1.79 | up | 0.000864 | 0.0000907 |
| HAUS2    | HAUS augmin-like complex, subunit 2                                                      | 1.79 | up | 0.000477 | 0.0000352 |
| HBA2     | hemoglobin, alpha 2                                                                      | 1.92 | up | 0.000315 | 0.0000176 |
| HBEGF    | heparin-binding EGF-like growth factor                                                   | 3.15 | up | 0.000053 | 0.0000006 |
| HCFC2    | host cell factor C2                                                                      | 1.90 | up | 0.003302 | 0.0006390 |
| HDAC11   | histone deacetylase 11                                                                   | 1.75 | up | 0.000952 | 0.0001061 |

|          |                                                                              |      |    |          |           |
|----------|------------------------------------------------------------------------------|------|----|----------|-----------|
| HDAC5    | histone deacetylase 5                                                        | 2.02 | up | 0.000073 | 0.0000012 |
| HECA     | headcase homolog (Drosophila)                                                | 1.81 | up | 0.000023 | 0.0000001 |
| HELZ2    | helicase with zinc finger 2, transcriptional coactivator                     | 1.67 | up | 0.000248 | 0.0000113 |
| HERC2P2  | hect domain and RLD 2 pseudogene 2                                           | 1.75 | up | 0.000810 | 0.0000819 |
| HES2     | hes family bHLH transcription factor 2                                       | 2.79 | up | 0.000014 | 0.0000000 |
| HIVEP2   | human immunodeficiency virus type I enhancer binding protein 2               | 1.58 | up | 0.003651 | 0.0007312 |
| HLA-A    | major histocompatibility complex, class I, A                                 | 1.81 | up | 0.001721 | 0.0002549 |
| HLA-DPB1 | major histocompatibility complex, class II, DP beta 1                        | 1.60 | up | 0.001676 | 0.0002454 |
| HLA-DQB1 | major histocompatibility complex, class II, DQ beta 1                        | 2.28 | up | 0.002348 | 0.0003909 |
| HLA-DRB1 | major histocompatibility complex, class II, DR beta 1                        | 2.33 | up | 0.000014 | 0.0000000 |
| HLA-DRB4 | major histocompatibility complex, class II, DR beta 4                        | 2.40 | up | 0.000094 | 0.0000018 |
| HLA-DRB5 | major histocompatibility complex, class II, DR beta 5                        | 2.19 | up | 0.004900 | 0.0011089 |
| HMCN2    | hemicentin 2                                                                 | 3.16 | up | 0.001249 | 0.0001589 |
| HMGA2    | high mobility group AT-hook 2                                                | 1.83 | up | 0.001661 | 0.0002418 |
| HMOX1    | heme oxygenase (decycling) 1                                                 | 2.00 | up | 0.000014 | 0.0000000 |
| HOXB4    | homeobox B4                                                                  | 1.79 | up | 0.000163 | 0.0000053 |
| HOXB6    | homeobox B6                                                                  | 1.87 | up | 0.001296 | 0.0001680 |
| HPSE     | heparanase                                                                   | 1.56 | up | 0.003533 | 0.0007012 |
| HRCT1    | histidine rich carboxyl terminus 1                                           | 6.64 | up | 0.000444 | 0.0000309 |
| HS1BP3   | HCLS1 binding protein 3                                                      | 3.13 | up | 0.000940 | 0.0001042 |
| HS2ST1   | heparan sulfate 2-O-sulfotransferase 1                                       | 1.59 | up | 0.002067 | 0.0003306 |
| HS3ST3B1 | heparan sulfate (glucosamine) 3-O-sulfotransferase 3B1                       | 1.66 | up | 0.002064 | 0.0003294 |
| HSD3B7   | hydroxy-delta-5-steroid dehydrogenase, 3 beta- and steroid delta-isomerase 7 | 1.66 | up | 0.000698 | 0.0000652 |
| HSH2D    | hematopoietic SH2 domain containing                                          | 1.96 | up | 0.000763 | 0.0000751 |
| HSPA4L   | heat shock 70kDa protein 4-like                                              | 1.65 | up | 0.000660 | 0.0000600 |
| HSPB8    | heat shock 22kDa protein 8                                                   | 2.76 | up | 0.000436 | 0.0000298 |
| HSPG2    | heparan sulfate proteoglycan 2                                               | 1.93 | up | 0.000061 | 0.0000009 |
| HTR1D    | 5-hydroxytryptamine (serotonin) receptor 1D, G protein-coupled               | 3.03 | up | 0.003624 | 0.0007246 |



|         |                                                                        |      |    |          |           |
|---------|------------------------------------------------------------------------|------|----|----------|-----------|
| HYAL1   | hyaluronoglucosaminidase 1                                             | 2.37 | up | 0.000102 | 0.0000022 |
| ID3     | inhibitor of DNA binding 3, dominant negative helix-loop-helix protein | 1.59 | up | 0.000127 | 0.0000035 |
| IER3    | immediate early response 3                                             | 1.81 | up | 0.000061 | 0.0000008 |
| IER5    | immediate early response 5                                             | 1.99 | up | 0.000116 | 0.0000029 |
| IFFO1   | intermediate filament family orphan 1                                  | 3.28 | up | 0.000806 | 0.0000814 |
| IFI27L1 | interferon, alpha-inducible protein 27-like 1                          | 1.75 | up | 0.000294 | 0.0000157 |
| IFI27L2 | interferon, alpha-inducible protein 27-like 2                          | 1.79 | up | 0.001741 | 0.0002594 |
| IFI6    | interferon, alpha-inducible protein 6                                  | 2.10 | up | 0.000135 | 0.0000039 |
| IFIH1   | interferon induced with helicase C domain 1                            | 1.78 | up | 0.000521 | 0.0000415 |
| IFIT2   | interferon-induced protein with tetratricopeptide repeats 2            | 1.73 | up | 0.001111 | 0.0001335 |
| IFIT3   | interferon-induced protein with tetratricopeptide repeats 3            | 2.20 | up | 0.001114 | 0.0001340 |
| IFITM2  | interferon induced transmembrane protein 2                             | 1.63 | up | 0.000448 | 0.0000314 |
| IFITM3  | interferon induced transmembrane protein 3                             | 1.59 | up | 0.001362 | 0.0001808 |
| IFNGR1  | interferon gamma receptor 1                                            | 1.62 | up | 0.001495 | 0.0002075 |
| IFRD1   | interferon-related developmental regulator 1                           | 2.48 | up | 0.000102 | 0.0000021 |
| IGF2    | insulin-like growth factor 2 (somatomedin A)                           | 2.45 | up | 0.000229 | 0.0000100 |
| IGFBP6  | insulin-like growth factor binding protein 6                           | 1.71 | up | 0.000380 | 0.0000239 |
| IGFL2   | IGF-like family member 2                                               | 2.63 | up | 0.000041 | 0.0000003 |
| IKBIP   | IKBKB interacting protein                                              | 3.01 | up | 0.000441 | 0.0000305 |
| IKZF5   | IKAROS family zinc finger 5 (Pegasus)                                  | 1.61 | up | 0.004900 | 0.0011093 |
| IL10RA  | interleukin 10 receptor, alpha                                         | 2.73 | up | 0.000041 | 0.0000003 |
| IL10RB  | interleukin 10 receptor, beta                                          | 1.64 | up | 0.001421 | 0.0001935 |
| IL11    | interleukin 11                                                         | 3.82 | up | 0.000150 | 0.0000047 |
| IL17RB  | interleukin 17 receptor B                                              | 1.73 | up | 0.000033 | 0.0000002 |
| IL1RAP  | interleukin 1 receptor accessory protein                               | 1.83 | up | 0.001662 | 0.0002426 |
| IL1RN   | interleukin 1 receptor antagonist                                      | 5.05 | up | 0.000006 | 0.0000000 |
| IL20RB  | interleukin 20 receptor beta                                           | 1.99 | up | 0.002198 | 0.0003577 |
| IL22RA1 | interleukin 22 receptor, alpha 1                                       | 1.83 | up | 0.002572 | 0.0004468 |
| IL4R    | interleukin 4 receptor                                                 | 1.59 | up | 0.001378 | 0.0001844 |

|          |                                                               |      |    |          |           |
|----------|---------------------------------------------------------------|------|----|----------|-----------|
| IL7      | interleukin 7                                                 | 1.98 | up | 0.003285 | 0.0006343 |
| ILK      | integrin-linked kinase                                        | 1.53 | up | 0.000044 | 0.0000004 |
| INHBB    | inhibin, beta B                                               | 2.68 | up | 0.000638 | 0.0000570 |
| INPP1    | inositol polyphosphate-1-phosphatase                          | 2.13 | up | 0.001705 | 0.0002515 |
| INPP4A   | inositol polyphosphate-4-phosphatase, type I, 107kDa          | 1.70 | up | 0.001133 | 0.0001377 |
| INPP5D   | inositol polyphosphate-5-phosphatase, 145kDa                  | 2.58 | up | 0.000295 | 0.0000159 |
| INTS7    | integrator complex subunit 7                                  | 1.76 | up | 0.002062 | 0.0003287 |
| IPP      | intracisternal A particle-promoted polypeptide                | 1.54 | up | 0.000589 | 0.0000505 |
| IRF7     | interferon regulatory factor 7                                | 2.89 | up | 0.000106 | 0.0000025 |
| IRF9     | interferon regulatory factor 9                                | 2.08 | up | 0.001200 | 0.0001494 |
| IRS2     | insulin receptor substrate 2                                  | 1.52 | up | 0.002055 | 0.0003266 |
| IRX3     | iroquois homeobox 3                                           | 1.82 | up | 0.002468 | 0.0004197 |
| ISCU     | iron-sulfur cluster assembly enzyme                           | 1.55 | up | 0.003901 | 0.0008022 |
| ISG15    | ISG15 ubiquitin-like modifier                                 | 2.46 | up | 0.000053 | 0.0000006 |
| ISG20    | interferon stimulated exonuclease gene 20kDa                  | 2.81 | up | 0.000226 | 0.0000096 |
| ITGA6    | integrin, alpha 6                                             | 1.95 | up | 0.001875 | 0.0002895 |
| ITGAX    | integrin, alpha X (complement component 3 receptor 4 subunit) | 3.23 | up | 0.000203 | 0.0000079 |
| ITGB1BP1 | integrin beta 1 binding protein 1                             | 1.55 | up | 0.000121 | 0.0000032 |
| ITPKA    | inositol-trisphosphate 3-kinase A                             | 1.79 | up | 0.000164 | 0.0000054 |
| ITPRIP   | inositol 1,4,5-trisphosphate receptor interacting protein     | 1.71 | up | 0.000482 | 0.0000360 |
| JAG1     | jagged 1                                                      | 1.88 | up | 0.000191 | 0.0000071 |
| JUN      | jun proto-oncogene                                            | 2.35 | up | 0.001594 | 0.0002282 |
| JUNB     | jun B proto-oncogene                                          | 1.96 | up | 0.000120 | 0.0000031 |
| JUP      | junction plakoglobin                                          | 1.94 | up | 0.000060 | 0.0000008 |
| KALRN    | kalirin, RhoGEF kinase                                        | 1.86 | up | 0.003827 | 0.0007780 |
| KANK3    | KN motif and ankyrin repeat domains 3                         | 2.26 | up | 0.000217 | 0.0000089 |
| KAT2B    | K(lysine) acetyltransferase 2B                                | 2.60 | up | 0.000463 | 0.0000338 |
| KATNAL1  | katanin p60 subunit A-like 1                                  | 1.58 | up | 0.002746 | 0.0004897 |
| KCNE1L   | KCNE1-like                                                    | 4.32 | up | 0.000242 | 0.0000108 |
| KCNK1    | potassium channel, subfamily K, member 1                      | 1.68 | up | 0.001102 | 0.0001317 |

|          |                                                                                           |      |    |          |           |
|----------|-------------------------------------------------------------------------------------------|------|----|----------|-----------|
| KCNK6    | potassium channel, subfamily K, member 6                                                  | 1.57 | up | 0.000487 | 0.0000368 |
| KCNK7    | potassium channel, subfamily K, member 7                                                  | 1.99 | up | 0.000741 | 0.0000714 |
| KCNN4    | potassium intermediate/small conductance calcium-activated channel, subfamily N, member 4 | 1.60 | up | 0.001204 | 0.0001507 |
| KCTD21   | potassium channel tetramerization domain containing 21                                    | 1.78 | up | 0.000621 | 0.0000544 |
| KDSR     | 3-ketodihydrosphingosine reductase                                                        | 1.72 | up | 0.000967 | 0.0001088 |
| KIAA0040 | KIAA0040                                                                                  | 1.70 | up | 0.000159 | 0.0000050 |
| KIAA0247 | KIAA0247                                                                                  | 2.95 | up | 0.000047 | 0.0000005 |
| KIAA1217 | KIAA1217                                                                                  | 2.16 | up | 0.002558 | 0.0004431 |
| KIAA1324 | KIAA1324                                                                                  | 4.86 | up | 0.000452 | 0.0000321 |
| KIAA1683 | KIAA1683                                                                                  | 1.57 | up | 0.002958 | 0.0005429 |
| KIAA1715 | KIAA1715                                                                                  | 1.74 | up | 0.004309 | 0.0009298 |
| KIF16B   | kinesin family member 16B                                                                 | 2.49 | up | 0.000831 | 0.0000846 |
| KIF1B    | kinesin family member 1B                                                                  | 1.84 | up | 0.001768 | 0.0002653 |
| KIF3C    | kinesin family member 3C                                                                  | 1.90 | up | 0.003463 | 0.0006802 |
| KIFAP3   | kinesin-associated protein 3                                                              | 1.81 | up | 0.000204 | 0.0000080 |
| KIRREL2  | kin of IRRE like 2 (Drosophila)                                                           | 1.81 | up | 0.001395 | 0.0001874 |
| KLF2     | Kruppel-like factor 2                                                                     | 2.10 | up | 0.000060 | 0.0000008 |
| KLHL30   | kelch-like family member 30                                                               | 4.31 | up | 0.000454 | 0.0000323 |
| KLHL36   | kelch-like family member 36                                                               | 1.54 | up | 0.003669 | 0.0007367 |
| KLK1     | kallikrein 1                                                                              | 1.74 | up | 0.003029 | 0.0005635 |
| KRT13    | keratin 13                                                                                | 2.11 | up | 0.004048 | 0.0008482 |
| KRT15    | keratin 15                                                                                | 3.21 | up | 0.000054 | 0.0000006 |
| KRT18    | keratin 18                                                                                | 1.64 | up | 0.001816 | 0.0002764 |
| KRT18P55 | keratin 18 pseudogene 55                                                                  | 1.63 | up | 0.002241 | 0.0003673 |
| KRT19P2  | keratin 19 pseudogene 2                                                                   | 1.54 | up | 0.004377 | 0.0009495 |
| KRT32    | keratin 32                                                                                | 1.84 | up | 0.000249 | 0.0000114 |
| KRT34    | keratin 34                                                                                | 2.61 | up | 0.000106 | 0.0000024 |
| KRT8     | keratin 8                                                                                 | 1.60 | up | 0.001055 | 0.0001238 |
| KRT80    | keratin 80                                                                                | 2.44 | up | 0.000633 | 0.0000563 |

|            |                                                           |      |    |          |           |
|------------|-----------------------------------------------------------|------|----|----------|-----------|
| KRT83      | keratin 83                                                | 1.51 | up | 0.000416 | 0.0000276 |
| KRT9       | keratin 9                                                 | 2.76 | up | 0.001153 | 0.0001410 |
| KRTAP10-12 | keratin associated protein 10-12                          | 1.65 | up | 0.004741 | 0.0010625 |
| KRTAP2-3   | keratin associated protein 2-3                            | 2.47 | up | 0.000341 | 0.0000202 |
| LAGE3      | L antigen family, member 3                                | 1.51 | up | 0.001899 | 0.0002945 |
| LAMA3      | laminin, alpha 3                                          | 6.09 | up | 0.000014 | 0.0000000 |
| LAMB2      | laminin, beta 2 (laminin S)                               | 1.67 | up | 0.000228 | 0.0000098 |
| LAMB3      | laminin, beta 3                                           | 3.65 | up | 0.000042 | 0.0000004 |
| LAMC2      | laminin, gamma 2                                          | 2.36 | up | 0.000090 | 0.0000017 |
| LAMP2      | lysosomal-associated membrane protein 2                   | 1.52 | up | 0.002044 | 0.0003240 |
| LAMP3      | lysosomal-associated membrane protein 3                   | 4.24 | up | 0.000027 | 0.0000001 |
| LAT2       | linker for activation of T cells family, member 2         | 3.81 | up | 0.000041 | 0.0000003 |
| LATS2      | large tumor suppressor kinase 2                           | 1.82 | up | 0.002299 | 0.0003798 |
| LCAT       | lecithin-cholesterol acyltransferase                      | 1.75 | up | 0.002838 | 0.0005142 |
| LCE1C      | late cornified envelope 1C                                | 4.99 | up | 0.002361 | 0.0003945 |
| LCE1E      | late cornified envelope 1E                                | 3.03 | up | 0.002804 | 0.0005070 |
| LCK        | lymphocyte-specific protein tyrosine kinase               | 4.76 | up | 0.001559 | 0.0002209 |
| LETM2      | leucine zipper-EF-hand containing transmembrane protein 2 | 2.24 | up | 0.000387 | 0.0000246 |
| LGALS7     | lectin, galactoside-binding, soluble, 7                   | 2.50 | up | 0.000022 | 0.0000001 |
| LGALS8     | lectin, galactoside-binding, soluble, 8                   | 1.73 | up | 0.002972 | 0.0005467 |
| LGALS9C    | lectin, galactoside-binding, soluble, 9C                  | 1.50 | up | 0.000492 | 0.0000375 |
| LHX2       | LIM homeobox 2                                            | 2.17 | up | 0.000031 | 0.0000002 |
| LIMA1      | LIM domain and actin binding 1                            | 1.68 | up | 0.000765 | 0.0000756 |
| LIMCH1     | LIM and calponin homology domains 1                       | 1.78 | up | 0.002943 | 0.0005393 |
| LIMS2      | LIM and senescent cell antigen-like domains 2             | 2.20 | up | 0.000528 | 0.0000424 |
| LIN7A      | lin-7 homolog A (C. elegans)                              | 2.30 | up | 0.001048 | 0.0001224 |
| LINC00337  | long intergenic non-protein coding RNA 337                | 2.30 | up | 0.000180 | 0.0000064 |
| LINC00618  | long intergenic non-protein coding RNA 618                | 1.61 | up | 0.000103 | 0.0000023 |
| LINC00857  | long intergenic non-protein coding RNA 857                | 1.66 | up | 0.001314 | 0.0001718 |
| LINC00937  | long intergenic non-protein coding RNA 937                | 1.92 | up | 0.000844 | 0.0000865 |

|              |                                                                |      |    |          |           |
|--------------|----------------------------------------------------------------|------|----|----------|-----------|
| LINC01137    | long intergenic non-protein coding RNA 1137                    | 2.46 | up | 0.001668 | 0.0002437 |
| LINC01270    | long intergenic non-protein coding RNA 1270                    | 1.77 | up | 0.000432 | 0.0000295 |
| LIPH         | lipase, member H                                               | 1.94 | up | 0.000126 | 0.0000034 |
| LNX1         | ligand of numb-protein X 1, E3 ubiquitin protein ligase        | 4.16 | up | 0.004724 | 0.0010572 |
| LOC101928841 | collagen alpha-1(II) chain-like                                | 9.19 | up | 0.000124 | 0.0000033 |
| LOC388242    | coiled-coil domain containing 101 pseudogene                   | 1.72 | up | 0.003361 | 0.0006546 |
| LOC389834    | ankyrin repeat domain 57 pseudogene                            | 2.88 | up | 0.001264 | 0.0001619 |
| LOC645166    | lymphocyte-specific protein 1 pseudogene                       | 2.34 | up | 0.000063 | 0.0000009 |
| LOC645638    | WDNM1-like pseudogene                                          | 6.39 | up | 0.000368 | 0.0000229 |
| LOXL2        | lysyl oxidase-like 2                                           | 1.59 | up | 0.000106 | 0.0000025 |
| LOXL4        | lysyl oxidase-like 4                                           | 2.04 | up | 0.000887 | 0.0000947 |
| LRG1         | leucine-rich alpha-2-glycoprotein 1                            | 2.19 | up | 0.000028 | 0.0000001 |
| LRP10        | low density lipoprotein receptor-related protein 10            | 2.36 | up | 0.000347 | 0.0000208 |
| LRRC32       | leucine rich repeat containing 32                              | 2.84 | up | 0.002299 | 0.0003798 |
| LRRC8C       | leucine rich repeat containing 8 family, member C              | 1.51 | up | 0.003962 | 0.0008222 |
| LSMEM1       | leucine-rich single-pass membrane protein 1                    | 3.01 | up | 0.000113 | 0.0000027 |
| LY6D         | lymphocyte antigen 6 complex, locus D                          | 2.81 | up | 0.000150 | 0.0000046 |
| LY6G6C       | lymphocyte antigen 6 complex, locus G6C                        | 2.33 | up | 0.001775 | 0.0002672 |
| LY6K         | lymphocyte antigen 6 complex, locus K                          | 1.73 | up | 0.000127 | 0.0000035 |
| LYNX1        | Ly6/neurotoxin 1                                               | 2.16 | up | 0.000590 | 0.0000506 |
| LYPD3        | LY6/PLAUR domain containing 3                                  | 2.77 | up | 0.002569 | 0.0004459 |
| LYPD5        | LY6/PLAUR domain containing 5                                  | 3.43 | up | 0.000041 | 0.0000003 |
| LZTS1        | leucine zipper, putative tumor suppressor 1                    | 2.23 | up | 0.001205 | 0.0001508 |
| MACC1        | metastasis associated in colon cancer 1                        | 3.83 | up | 0.000907 | 0.0000977 |
| MAD2L2       | MAD2 mitotic arrest deficient-like 2 (yeast)                   | 4.55 | up | 0.003308 | 0.0006410 |
| MAFB         | v-maf avian musculoaponeurotic fibrosarcoma oncogene homolog B | 3.43 | up | 0.000641 | 0.0000576 |
| MAFF         | v-maf avian musculoaponeurotic fibrosarcoma oncogene homolog F | 2.13 | up | 0.000089 | 0.0000017 |
| MAMDC4       | MAM domain containing 4                                        | 1.73 | up | 0.001763 | 0.0002644 |

|            |                                                                                        |      |    |          |           |
|------------|----------------------------------------------------------------------------------------|------|----|----------|-----------|
| MAP1LC3B   | microtubule-associated protein 1 light chain 3 beta                                    | 1.91 | up | 0.000073 | 0.0000012 |
| MAP1LC3BP1 | microtubule-associated protein 1 light chain 3 beta pseudogene 1                       | 1.73 | up | 0.000380 | 0.0000239 |
| MAP2       | microtubule-associated protein 2                                                       | 2.18 | up | 0.000043 | 0.0000004 |
| MAP3K12    | mitogen-activated protein kinase kinase kinase 12                                      | 2.15 | up | 0.000205 | 0.0000081 |
| MAP3K13    | mitogen-activated protein kinase kinase kinase 13                                      | 2.10 | up | 0.000294 | 0.0000157 |
| MAP3K9     | mitogen-activated protein kinase kinase kinase 9                                       | 1.64 | up | 0.000855 | 0.0000894 |
| MAPK11     | mitogen-activated protein kinase 11                                                    | 1.80 | up | 0.003355 | 0.0006529 |
| MAPK13     | mitogen-activated protein kinase 13                                                    | 1.79 | up | 0.000419 | 0.0000280 |
| MAPKAP1    | mitogen-activated protein kinase associated protein 1                                  | 1.70 | up | 0.000136 | 0.0000040 |
| MAPRE2     | microtubule-associated protein, RP/EB family, member 2                                 | 1.72 | up | 0.000135 | 0.0000039 |
| MARCH9     | membrane-associated ring finger (C3HC4) 9                                              | 1.57 | up | 0.000041 | 0.0000003 |
| MARVELD3   | MARVEL domain containing 3                                                             | 1.53 | up | 0.000120 | 0.0000031 |
| MASTL      | microtubule associated serine/threonine kinase-like                                    | 1.55 | up | 0.000170 | 0.0000058 |
| MATN2      | matrilin 2                                                                             | 1.85 | up | 0.004768 | 0.0010700 |
| MBD1       | methyl-CpG binding domain protein 1                                                    | 1.57 | up | 0.000566 | 0.0000475 |
| MCF2L-AS1  | MCF2L antisense RNA 1                                                                  | 1.97 | up | 0.000041 | 0.0000003 |
| MDK        | midkine (neurite growth-promoting factor 2)                                            | 1.67 | up | 0.000163 | 0.0000053 |
| MDM2       | MDM2 oncogene, E3 ubiquitin protein ligase                                             | 2.30 | up | 0.001836 | 0.0002810 |
| MED20      | mediator complex subunit 20                                                            | 1.52 | up | 0.000858 | 0.0000898 |
| MEF2BNB    | MEF2B neighbor                                                                         | 1.71 | up | 0.003962 | 0.0008220 |
| MEIG1      | meiosis/spermiogenesis associated 1                                                    | 1.54 | up | 0.004258 | 0.0009130 |
| MFGE8      | milk fat globule-EGF factor 8 protein                                                  | 1.80 | up | 0.001756 | 0.0002631 |
| MFSD4      | major facilitator superfamily domain containing 4                                      | 3.13 | up | 0.004039 | 0.0008449 |
| MGAT4A     | mannosyl (alpha-1,3-)-glycoprotein beta-1,4-N-acetylglucosaminyltransferase, isozyme A | 2.45 | up | 0.000474 | 0.0000348 |
| MGLL       | monoglyceride lipase                                                                   | 2.18 | up | 0.000228 | 0.0000098 |
| MGST3      | microsomal glutathione S-transferase 3                                                 | 1.50 | up | 0.003199 | 0.0006100 |
| MICALL2    | MICAL-like 2                                                                           | 1.50 | up | 0.003076 | 0.0005754 |
| MID2       | midline 2                                                                              | 1.80 | up | 0.001396 | 0.0001881 |

|         |                                                                                                 |       |    |          |           |
|---------|-------------------------------------------------------------------------------------------------|-------|----|----------|-----------|
| MIEF2   | mitochondrial elongation factor 2                                                               | 1.63  | up | 0.000304 | 0.0000166 |
| MIG7    | mig-7                                                                                           | 11.78 | up | 0.000291 | 0.0000154 |
| MIR31HG | MIR31 host gene (non-protein coding)                                                            | 4.95  | up | 0.000204 | 0.0000080 |
| MITF    | microphthalmia-associated transcription factor                                                  | 1.75  | up | 0.002707 | 0.0004801 |
| MKRN1   | makorin ring finger protein 1                                                                   | 2.11  | up | 0.000812 | 0.0000823 |
| MLLT11  | myeloid/lymphoid or mixed-lineage leukemia (trithorax homolog, Drosophila); translocated to, 11 | 1.64  | up | 0.001480 | 0.0002046 |
| MLXIP   | MLX interacting protein                                                                         | 1.62  | up | 0.003728 | 0.0007521 |
| MNX1    | motor neuron and pancreas homeobox 1                                                            | 1.75  | up | 0.000686 | 0.0000635 |
| MOAP1   | modulator of apoptosis 1                                                                        | 1.55  | up | 0.000613 | 0.0000532 |
| MORC3   | MORC family CW-type zinc finger 3                                                               | 1.52  | up | 0.000319 | 0.0000180 |
| MORN4   | MORN repeat containing 4                                                                        | 2.50  | up | 0.000160 | 0.0000051 |
| MOSPD1  | motile sperm domain containing 1                                                                | 1.60  | up | 0.003852 | 0.0007864 |
| MPC1    | mitochondrial pyruvate carrier 1                                                                | 1.99  | up | 0.000043 | 0.0000004 |
| MPC2    | mitochondrial pyruvate carrier 2                                                                | 1.74  | up | 0.000028 | 0.0000001 |
| MPND    | MPN domain containing                                                                           | 1.55  | up | 0.000598 | 0.0000515 |
| MPPE1   | metallophosphoesterase 1                                                                        | 2.36  | up | 0.001290 | 0.0001669 |
| MPRIIP  | myosin phosphatase Rho interacting protein                                                      | 2.98  | up | 0.000782 | 0.0000779 |
| MPZL2   | myelin protein zero-like 2                                                                      | 2.03  | up | 0.000018 | 0.0000000 |
| MPZL3   | myelin protein zero-like 3                                                                      | 1.79  | up | 0.000514 | 0.0000407 |
| MR1     | major histocompatibility complex, class I-related                                               | 2.66  | up | 0.000450 | 0.0000319 |
| MRC2    | mannose receptor, C type 2                                                                      | 1.77  | up | 0.000396 | 0.0000256 |
| MROH1   | maestro heat-like repeat family member 1                                                        | 2.64  | up | 0.000266 | 0.0000131 |
| MSANTD2 | Myb/SANT-like DNA-binding domain containing 2                                                   | 1.57  | up | 0.002541 | 0.0004390 |
| MSI2    | musashi RNA-binding protein 2                                                                   | 2.16  | up | 0.000503 | 0.0000391 |
| MT1B    | metallothionein 1B                                                                              | 1.53  | up | 0.000483 | 0.0000362 |
| MT2A    | metallothionein 2A                                                                              | 1.73  | up | 0.002289 | 0.0003772 |
| MUC1    | mucin 1, cell surface associated                                                                | 1.51  | up | 0.000854 | 0.0000890 |
| MXD1    | MAX dimerization protein 1                                                                      | 2.27  | up | 0.000116 | 0.0000029 |
| MYBL1   | v-myb avian myeloblastosis viral oncogene homolog-like 1                                        | 2.38  | up | 0.000447 | 0.0000313 |

|         |                                                                |      |    |          |           |
|---------|----------------------------------------------------------------|------|----|----------|-----------|
| MYBPC3  | myosin binding protein C, cardiac                              | 1.59 | up | 0.000676 | 0.0000622 |
| MYEOV   | myeloma overexpressed                                          | 2.16 | up | 0.000102 | 0.0000022 |
| MYO1A   | myosin IA                                                      | 6.52 | up | 0.000047 | 0.0000005 |
| MYO1E   | myosin IE                                                      | 1.95 | up | 0.000043 | 0.0000004 |
| MYO6    | myosin VI                                                      | 1.65 | up | 0.000169 | 0.0000058 |
| MYO7A   | myosin VIIA                                                    | 2.13 | up | 0.000535 | 0.0000434 |
| MYOM2   | myomesin 2                                                     | 1.77 | up | 0.000866 | 0.0000912 |
| MYZAP   | myocardial zonula adherens protein                             | 1.55 | up | 0.000899 | 0.0000966 |
| N4BP2L2 | NEDD4 binding protein 2-like 2                                 | 2.81 | up | 0.000098 | 0.0000020 |
| NABP2   | nucleic acid binding protein 2                                 | 1.55 | up | 0.001773 | 0.0002663 |
| NAP1L5  | nucleosome assembly protein 1-like 5                           | 2.20 | up | 0.000917 | 0.0000995 |
| NAT1    | N-acetyltransferase 1 (arylamine N-acetyltransferase)          | 1.58 | up | 0.002726 | 0.0004847 |
| NAV3    | neuron navigator 3                                             | 1.74 | up | 0.001924 | 0.0003002 |
| NCAPH2  | non-SMC condensin II complex, subunit H2                       | 1.71 | up | 0.000079 | 0.0000013 |
| NCEH1   | neutral cholesterol ester hydrolase 1                          | 2.39 | up | 0.000041 | 0.0000003 |
| NCOA7   | nuclear receptor coactivator 7                                 | 1.59 | up | 0.000135 | 0.0000039 |
| NDOR1   | NADPH dependent diflavin oxidoreductase 1                      | 1.84 | up | 0.000445 | 0.0000310 |
| NDRG1   | N-myc downstream regulated 1                                   | 3.09 | up | 0.000014 | 0.0000000 |
| NDRG4   | NDRG family member 4                                           | 2.06 | up | 0.000097 | 0.0000020 |
| NDUFB11 | NADH dehydrogenase (ubiquinone) 1 beta subcomplex, 11, 17.3kDa | 1.54 | up | 0.000022 | 0.0000001 |
| NEK11   | NIMA-related kinase 11                                         | 1.63 | up | 0.000958 | 0.0001072 |
| NES     | nestin                                                         | 1.73 | up | 0.000875 | 0.0000926 |
| NEU1    | sialidase 1 (lysosomal sialidase)                              | 2.09 | up | 0.000407 | 0.0000267 |
| NEURL1B | neuralized E3 ubiquitin protein ligase 1B                      | 1.83 | up | 0.000180 | 0.0000064 |
| NGEF    | neuronal guanine nucleotide exchange factor                    | 1.74 | up | 0.000037 | 0.0000003 |
| NGFR    | nerve growth factor receptor                                   | 2.35 | up | 0.000077 | 0.0000013 |
| NINJ1   | ninjurin 1                                                     | 2.13 | up | 0.000204 | 0.0000079 |
| NIPA1   | non imprinted in Prader-Willi/Angelman syndrome 1              | 1.56 | up | 0.002996 | 0.0005545 |
| NIPAL3  | NIPA-like domain containing 3                                  | 2.72 | up | 0.000211 | 0.0000086 |



|          |                                                                              |      |    |          |           |
|----------|------------------------------------------------------------------------------|------|----|----------|-----------|
| NKX3-1   | NK3 homeobox 1                                                               | 1.99 | up | 0.000082 | 0.0000015 |
| NLRP1    | NLR family, pyrin domain containing 1                                        | 2.81 | up | 0.000364 | 0.0000225 |
| NMB      | neuromedin B                                                                 | 1.68 | up | 0.004102 | 0.0008645 |
| NOL4L    | nucleolar protein 4-like                                                     | 5.77 | up | 0.004789 | 0.0010769 |
| NOSTRIN  | nitric oxide synthase trafficking                                            | 1.61 | up | 0.001661 | 0.0002419 |
| NOTCH3   | notch 3                                                                      | 1.86 | up | 0.001863 | 0.0002869 |
| NOVA2    | neuro-oncological ventral antigen 2                                          | 2.16 | up | 0.000534 | 0.0000432 |
| NPNT     | nephronectin                                                                 | 1.57 | up | 0.001929 | 0.0003012 |
| NR1D1    | nuclear receptor subfamily 1, group D, member 1                              | 1.93 | up | 0.000208 | 0.0000083 |
| NR3C1    | nuclear receptor subfamily 3, group C, member 1<br>(glucocorticoid receptor) | 1.84 | up | 0.000135 | 0.0000039 |
| NR4A3    | nuclear receptor subfamily 4, group A, member 3                              | 2.67 | up | 0.002550 | 0.0004411 |
| NRP1     | neuropilin 1                                                                 | 5.17 | up | 0.000417 | 0.0000278 |
| NT5E     | 5'-nucleotidase, ecto (CD73)                                                 | 1.57 | up | 0.000750 | 0.0000730 |
| NTN4     | netrin 4                                                                     | 1.83 | up | 0.002521 | 0.0004335 |
| NTPCR    | nucleoside-triphosphatase, cancer-related                                    | 1.72 | up | 0.000132 | 0.0000037 |
| NUAK2    | NUAK family, SNF1-like kinase, 2                                             | 2.46 | up | 0.000136 | 0.0000040 |
| NUCB2    | nucleobindin 2                                                               | 1.62 | up | 0.000115 | 0.0000028 |
| NUDT16L1 | nudix (nucleoside diphosphate linked moiety X)-type motif 16-<br>like 1      | 1.68 | up | 0.000772 | 0.0000764 |
| OASL     | 2'-5'-oligoadenylate synthetase-like                                         | 3.55 | up | 0.000044 | 0.0000004 |
| OCLN     | occludin                                                                     | 1.85 | up | 0.000537 | 0.0000436 |
| ODF2     | outer dense fiber of sperm tails 2                                           | 1.67 | up | 0.001919 | 0.0002985 |
| OLFM1    | olfactomedin 1                                                               | 1.77 | up | 0.001576 | 0.0002235 |
| OPTN     | optineurin                                                                   | 1.97 | up | 0.000301 | 0.0000165 |
| ORAI3    | ORAI calcium release-activated calcium modulator 3                           | 1.62 | up | 0.001143 | 0.0001395 |
| OSBPL2   | oxysterol binding protein-like 2                                             | 1.81 | up | 0.000253 | 0.0000119 |
| OTUD1    | OTU deubiquitinase 1                                                         | 1.51 | up | 0.002988 | 0.0005515 |
| OVOL1    | ovo-like zinc finger 1                                                       | 1.80 | up | 0.000281 | 0.0000145 |
| P2RY2    | purinergic receptor P2Y, G-protein coupled, 2                                | 2.20 | up | 0.000136 | 0.0000040 |

|        |                                                                      |      |    |          |           |
|--------|----------------------------------------------------------------------|------|----|----------|-----------|
| P4HA2  | prolyl 4-hydroxylase, alpha polypeptide II                           | 1.72 | up | 0.000826 | 0.0000840 |
| PAG1   | phosphoprotein membrane anchor with glycosphingolipid microdomains 1 | 2.75 | up | 0.004097 | 0.0008619 |
| PAPD5  | PAP associated domain containing 5                                   | 4.56 | up | 0.002172 | 0.0003523 |
| PAPSS2 | 3'-phosphoadenosine 5'-phosphosulfate synthase 2                     | 1.65 | up | 0.001399 | 0.0001888 |
| PARD6A | par-6 family cell polarity regulator alpha                           | 2.40 | up | 0.000103 | 0.0000023 |
| PARD6B | par-6 family cell polarity regulator beta                            | 1.69 | up | 0.000900 | 0.0000968 |
| PC     | pyruvate carboxylase                                                 | 1.52 | up | 0.000621 | 0.0000546 |
| PCDH1  | protocadherin 1                                                      | 2.92 | up | 0.000074 | 0.0000012 |
| PCGF5  | polycomb group ring finger 5                                         | 1.65 | up | 0.002226 | 0.0003638 |
| PCNA   | proliferating cell nuclear antigen                                   | 1.78 | up | 0.000136 | 0.0000040 |
| PCYT1A | phosphate cytidylyltransferase 1, choline, alpha                     | 1.87 | up | 0.001376 | 0.0001837 |
| PDE2A  | phosphodiesterase 2A, cGMP-stimulated                                | 1.52 | up | 0.000515 | 0.0000408 |
| PDE6G  | phosphodiesterase 6G, cGMP-specific, rod, gamma                      | 2.85 | up | 0.000159 | 0.0000051 |
| PDGFB  | platelet-derived growth factor beta polypeptide                      | 1.50 | up | 0.000619 | 0.0000540 |
| PDLIM3 | PDZ and LIM domain 3                                                 | 2.49 | up | 0.000028 | 0.0000001 |
| PDLIM7 | PDZ and LIM domain 7 (enigma)                                        | 2.38 | up | 0.000022 | 0.0000001 |
| PDZD11 | PDZ domain containing 11                                             | 1.68 | up | 0.000728 | 0.0000695 |
| PEAR1  | platelet endothelial aggregation receptor 1                          | 2.41 | up | 0.000051 | 0.0000006 |
| PERP   | PERP, TP53 apoptosis effector                                        | 1.76 | up | 0.000531 | 0.0000428 |
| PGBD2  | piggyBac transposable element derived 2                              | 1.72 | up | 0.001106 | 0.0001322 |
| PGF    | placental growth factor                                              | 2.13 | up | 0.000621 | 0.0000544 |
| PGPEP1 | pyroglutamyl-peptidase I                                             | 2.19 | up | 0.000206 | 0.0000082 |
| PHLDA3 | pleckstrin homology-like domain, family A, member 3                  | 3.05 | up | 0.000115 | 0.0000028 |
| PHPT1  | phosphohistidine phosphatase 1                                       | 2.14 | up | 0.000093 | 0.0000018 |
| PHYHIP | phytanoyl-CoA 2-hydroxylase interacting protein                      | 3.39 | up | 0.002348 | 0.0003910 |
| PI4K2A | phosphatidylinositol 4-kinase type 2 alpha                           | 1.75 | up | 0.000016 | 0.0000000 |
| PI4KB  | phosphatidylinositol 4-kinase, catalytic, beta                       | 1.56 | up | 0.000389 | 0.0000249 |
| PIDD1  | p53-induced death domain protein 1                                   | 2.13 | up | 0.000670 | 0.0000615 |
| PIM1   | pim-1 oncogene                                                       | 1.93 | up | 0.001820 | 0.0002772 |

|         |                                                                             |      |    |          |           |
|---------|-----------------------------------------------------------------------------|------|----|----------|-----------|
| PINK1   | PTEN induced putative kinase 1                                              | 1.95 | up | 0.000177 | 0.0000062 |
| PLA2G10 | phospholipase A2, group X                                                   | 1.81 | up | 0.000673 | 0.0000619 |
| PLA2G15 | phospholipase A2, group XV                                                  | 1.51 | up | 0.000743 | 0.0000722 |
| PLA2G16 | phospholipase A2, group XVI                                                 | 1.69 | up | 0.000726 | 0.0000692 |
| PLA2G4D | phospholipase A2, group IVD (cytosolic)                                     | 5.17 | up | 0.000195 | 0.0000074 |
| PLAT    | plasminogen activator, tissue                                               | 1.74 | up | 0.000094 | 0.0000019 |
| PLAU    | plasminogen activator, urokinase                                            | 4.51 | up | 0.000000 | 0.0000000 |
| PLAUR   | plasminogen activator, urokinase receptor                                   | 2.17 | up | 0.000033 | 0.0000002 |
| PLCL2   | phospholipase C-like 2                                                      | 3.38 | up | 0.002680 | 0.0004735 |
| PLCXD1  | phosphatidylinositol-specific phospholipase C, X domain containing 1        | 1.52 | up | 0.002943 | 0.0005395 |
| PLEC    | plectin                                                                     | 1.66 | up | 0.000894 | 0.0000955 |
| PLEKHB1 | pleckstrin homology domain containing, family B (evectins) member 1         | 1.73 | up | 0.001210 | 0.0001516 |
| PLEKHF1 | pleckstrin homology domain containing, family F (with FYVE domain) member 1 | 1.74 | up | 0.001281 | 0.0001655 |
| PLIN2   | perilipin 2                                                                 | 1.72 | up | 0.000663 | 0.0000604 |
| PLK2    | polo-like kinase 2                                                          | 2.17 | up | 0.000054 | 0.0000006 |
| PLK3    | polo-like kinase 3                                                          | 3.02 | up | 0.000163 | 0.0000053 |
| PLSCR4  | phospholipid scramblase 4                                                   | 2.14 | up | 0.002517 | 0.0004321 |
| PMAIP1  | phorbol-12-myristate-13-acetate-induced protein 1                           | 2.29 | up | 0.000166 | 0.0000055 |
| PMEL    | premelanosome protein                                                       | 2.03 | up | 0.002410 | 0.0004050 |
| PML     | promyelocytic leukemia                                                      | 1.59 | up | 0.000119 | 0.0000031 |
| PNPLA8  | patatin-like phospholipase domain containing 8                              | 1.89 | up | 0.000577 | 0.0000489 |
| PNRC1   | proline-rich nuclear receptor coactivator 1                                 | 1.58 | up | 0.003049 | 0.0005676 |
| POLD4   | polymerase (DNA-directed), delta 4, accessory subunit                       | 1.59 | up | 0.000317 | 0.0000178 |
| POLH    | polymerase (DNA directed), eta                                              | 1.78 | up | 0.000219 | 0.0000092 |
| PPAP2B  | phosphatidic acid phosphatase type 2B                                       | 1.79 | up | 0.001872 | 0.0002889 |
| PPL     | periplakin                                                                  | 1.66 | up | 0.002804 | 0.0005067 |
| PPM1A   | protein phosphatase, Mg <sup>2+</sup> /Mn <sup>2+</sup> dependent, 1A       | 3.10 | up | 0.002462 | 0.0004178 |
| PPM1D   | protein phosphatase, Mg <sup>2+</sup> /Mn <sup>2+</sup> dependent, 1D       | 3.00 | up | 0.000020 | 0.0000000 |

|          |                                                                       |      |    |          |           |
|----------|-----------------------------------------------------------------------|------|----|----------|-----------|
| PPM1K    | protein phosphatase, Mg <sup>2+</sup> /Mn <sup>2+</sup> dependent, 1K | 1.89 | up | 0.002594 | 0.0004523 |
| PPM1M    | protein phosphatase, Mg <sup>2+</sup> /Mn <sup>2+</sup> dependent, 1M | 1.64 | up | 0.003280 | 0.0006328 |
| PPP1R14C | protein phosphatase 1, regulatory (inhibitor) subunit 14C             | 2.13 | up | 0.000183 | 0.0000066 |
| PPP1R15A | protein phosphatase 1, regulatory subunit 15A                         | 1.86 | up | 0.000329 | 0.0000190 |
| PPP2R5B  | protein phosphatase 2, regulatory subunit B', beta                    | 1.70 | up | 0.002214 | 0.0003609 |
| PPT2     | palmitoyl-protein thioesterase 2                                      | 1.72 | up | 0.000548 | 0.0000452 |
| PPY      | pancreatic polypeptide                                                | 2.07 | up | 0.001876 | 0.0002898 |
| PRADC1   | protease-associated domain containing 1                               | 1.89 | up | 0.000250 | 0.0000116 |
| PRDM1    | PR domain containing 1, with ZNF domain                               | 6.10 | up | 0.001594 | 0.0002282 |
| PRH2     | proline-rich protein HaeIII subfamily 2                               | 1.67 | up | 0.001504 | 0.0002100 |
| PRKAB1   | protein kinase, AMP-activated, beta 1 non-catalytic subunit           | 1.93 | up | 0.000281 | 0.0000145 |
| PRKAB2   | protein kinase, AMP-activated, beta 2 non-catalytic subunit           | 1.76 | up | 0.000167 | 0.0000056 |
| PRKAR1A  | protein kinase, cAMP-dependent, regulatory, type I, alpha             | 1.57 | up | 0.001592 | 0.0002269 |
| PRKAR1B  | protein kinase, cAMP-dependent, regulatory, type I, beta              | 1.55 | up | 0.004157 | 0.0008810 |
| PRKCH    | protein kinase C, eta                                                 | 1.95 | up | 0.000184 | 0.0000067 |
| PROCR    | protein C receptor, endothelial                                       | 2.34 | up | 0.000080 | 0.0000014 |
| PRODH    | proline dehydrogenase (oxidase) 1                                     | 1.95 | up | 0.000208 | 0.0000084 |
| PROM2    | prominin 2                                                            | 2.50 | up | 0.000108 | 0.0000025 |
| PRR15L   | proline rich 15-like                                                  | 2.10 | up | 0.000185 | 0.0000067 |
| PRRG1    | proline rich Gla (G-carboxyglutamic acid) 1                           | 2.74 | up | 0.000091 | 0.0000017 |
| PRRG2    | proline rich Gla (G-carboxyglutamic acid) 2                           | 1.79 | up | 0.002168 | 0.0003511 |
| PRRG4    | proline rich Gla (G-carboxyglutamic acid) 4 (transmembrane)           | 1.55 | up | 0.000019 | 0.0000000 |
| PRSS2    | protease, serine, 2 (trypsin 2)                                       | 2.27 | up | 0.000230 | 0.0000101 |
| PRSS3    | protease, serine, 3                                                   | 2.11 | up | 0.000102 | 0.0000021 |
| PRSS30P  | protease, serine, 30, pseudogene                                      | 1.66 | up | 0.000400 | 0.0000260 |
| PRSS35   | protease, serine, 35                                                  | 5.14 | up | 0.003191 | 0.0006066 |
| PRSS56   | protease, serine, 56                                                  | 3.72 | up | 0.000304 | 0.0000166 |
| PRSS57   | protease, serine, 57                                                  | 2.06 | up | 0.002788 | 0.0005022 |
| PRSS8    | protease, serine, 8                                                   | 1.72 | up | 0.000463 | 0.0000336 |
| PSAPL1   | prosaposin-like 1 (gene/pseudogene)                                   | 4.09 | up | 0.000336 | 0.0000198 |

|          |                                                                                         |      |    |          |           |
|----------|-----------------------------------------------------------------------------------------|------|----|----------|-----------|
| PSMC3IP  | PSMC3 interacting protein                                                               | 1.64 | up | 0.000507 | 0.0000397 |
| PSORS1C1 | psoriasis susceptibility 1 candidate 1                                                  | 1.86 | up | 0.000135 | 0.0000039 |
| PSTPIP2  | proline-serine-threonine phosphatase interacting protein 2                              | 1.96 | up | 0.000211 | 0.0000086 |
| PTAFR    | platelet-activating factor receptor                                                     | 4.27 | up | 0.000256 | 0.0000123 |
| PTBP3    | polypyrimidine tract binding protein 3                                                  | 1.57 | up | 0.000102 | 0.0000022 |
| PTPRU    | protein tyrosine phosphatase, receptor type, U                                          | 1.65 | up | 0.000250 | 0.0000116 |
| PVRL1    | poliovirus receptor-related 1 (herpesvirus entry mediator C)                            | 2.92 | up | 0.000168 | 0.0000057 |
| PVRL4    | poliovirus receptor-related 4                                                           | 4.45 | up | 0.000102 | 0.0000022 |
| PXK      | PX domain containing serine/threonine kinase                                            | 1.75 | up | 0.004190 | 0.0008925 |
| PYCARDOS | PYCARD opposite strand                                                                  | 3.25 | up | 0.000482 | 0.0000361 |
| RAB15    | RAB15, member RAS oncogene family                                                       | 2.02 | up | 0.000568 | 0.0000477 |
| RAB27A   | RAB27A, member RAS oncogene family                                                      | 2.29 | up | 0.000234 | 0.0000103 |
| RAB3A    | RAB3A, member RAS oncogene family                                                       | 1.73 | up | 0.001791 | 0.0002707 |
| RAC2     | ras-related C3 botulinum toxin substrate 2 (rho family, small GTP binding protein Rac2) | 1.92 | up | 0.001194 | 0.0001478 |
| RAD1     | RAD1 homolog ( <i>S. pombe</i> )                                                        | 1.90 | up | 0.000335 | 0.0000197 |
| RAD51C   | RAD51 paralog C                                                                         | 1.52 | up | 0.000094 | 0.0000019 |
| RAET1E   | retinoic acid early transcript 1E                                                       | 2.40 | up | 0.001378 | 0.0001840 |
| RASA4    | RAS p21 protein activator 4                                                             | 1.57 | up | 0.003892 | 0.0007988 |
| RASA4B   | RAS p21 protein activator 4B                                                            | 2.09 | up | 0.000563 | 0.0000471 |
| RASGRP2  | RAS guanyl releasing protein 2 (calcium and DAG-regulated)                              | 2.43 | up | 0.000060 | 0.0000008 |
| RASL10A  | RAS-like, family 10, member A                                                           | 2.11 | up | 0.000227 | 0.0000097 |
| RASSF5   | Ras association (RalGDS/AF-6) domain family member 5                                    | 1.83 | up | 0.000736 | 0.0000705 |
| RBM18    | RNA binding motif protein 18                                                            | 1.66 | up | 0.000917 | 0.0000996 |
| RBM4B    | RNA binding motif protein 4B                                                            | 1.53 | up | 0.002623 | 0.0004604 |
| RBPM5    | RNA binding protein with multiple splicing 2                                            | 1.56 | up | 0.002064 | 0.0003295 |
| RDX      | radixin                                                                                 | 2.39 | up | 0.001553 | 0.0002199 |
| RECQL5   | RecQ protein-like 5                                                                     | 2.03 | up | 0.000957 | 0.0001070 |
| REEP2    | receptor accessory protein 2                                                            | 1.98 | up | 0.000229 | 0.0000100 |
| RELL1    | RELT-like 1                                                                             | 1.75 | up | 0.000852 | 0.0000887 |

|          |                                                                |      |    |          |           |
|----------|----------------------------------------------------------------|------|----|----------|-----------|
| RELT     | RELT tumor necrosis factor receptor                            | 1.66 | up | 0.001402 | 0.0001899 |
| RFTN1    | raftlin, lipid raft linker 1                                   | 1.96 | up | 0.001996 | 0.0003146 |
| RFX5     | regulatory factor X, 5 (influences HLA class II expression)    | 1.96 | up | 0.000102 | 0.0000022 |
| RGAG4    | retrotransposon gag domain containing 4                        | 2.18 | up | 0.000431 | 0.0000292 |
| RGCC     | regulator of cell cycle                                        | 1.82 | up | 0.000361 | 0.0000220 |
| RGS20    | regulator of G-protein signaling 20                            | 1.88 | up | 0.000275 | 0.0000138 |
| RHBDD2   | rhomboid domain containing 2                                   | 1.91 | up | 0.001415 | 0.0001922 |
| RHBDF1   | rhomboid 5 homolog 1 (Drosophila)                              | 1.57 | up | 0.001741 | 0.0002592 |
| RHOBTB2  | Rho-related BTB domain containing 2                            | 1.55 | up | 0.002750 | 0.0004910 |
| RHOD     | ras homolog family member D                                    | 2.05 | up | 0.000061 | 0.0000009 |
| RHOF     | ras homolog family member F (in filopodia)                     | 1.66 | up | 0.001819 | 0.0002771 |
| RIMBP3   | RIMS binding protein 3                                         | 2.20 | up | 0.001342 | 0.0001769 |
| RIN1     | Ras and Rab interactor 1                                       | 1.64 | up | 0.000770 | 0.0000762 |
| RINL     | Ras and Rab interactor-like                                    | 2.64 | up | 0.000342 | 0.0000204 |
| RIOK3    | RIO kinase 3                                                   | 2.67 | up | 0.000040 | 0.0000003 |
| RMRP     | RNA component of mitochondrial RNA processing endoribonuclease | 2.50 | up | 0.000082 | 0.0000015 |
| RNASEH2A | ribonuclease H2, subunit A                                     | 1.62 | up | 0.000209 | 0.0000084 |
| RND3     | Rho family GTPase 3                                            | 1.79 | up | 0.000209 | 0.0000084 |
| RNF14    | ring finger protein 14                                         | 1.70 | up | 0.000328 | 0.0000188 |
| RNF146   | ring finger protein 146                                        | 1.52 | up | 0.000421 | 0.0000282 |
| RNF182   | ring finger protein 182                                        | 2.36 | up | 0.000191 | 0.0000071 |
| RNF38    | ring finger protein 38                                         | 1.52 | up | 0.003579 | 0.0007128 |
| RNU2-1   | RNA, U2 small nuclear 1                                        | 2.08 | up | 0.000487 | 0.0000368 |
| RPL23AP7 | ribosomal protein L23a pseudogene 7                            | 1.91 | up | 0.000498 | 0.0000384 |
| RPL27A   | ribosomal protein L27a                                         | 1.55 | up | 0.001748 | 0.0002612 |
| RPS27L   | ribosomal protein S27-like                                     | 2.60 | up | 0.000279 | 0.0000142 |
| RRAD     | Ras-related associated with diabetes                           | 2.34 | up | 0.001755 | 0.0002628 |
| RRAGC    | Ras-related GTP binding C                                      | 1.61 | up | 0.000949 | 0.0001053 |
| RRM1     | ribonucleotide reductase M1                                    | 1.54 | up | 0.000884 | 0.0000943 |

|         |                                                                                        |      |    |          |           |
|---------|----------------------------------------------------------------------------------------|------|----|----------|-----------|
| RSRP1   | arginine/serine-rich protein 1                                                         | 2.43 | up | 0.000068 | 0.0000010 |
| RUFY2   | RUN and FYVE domain containing 2                                                       | 2.77 | up | 0.000907 | 0.0000978 |
| RUNX1   | runt-related transcription factor 1                                                    | 3.60 | up | 0.000219 | 0.0000092 |
| RUSC1   | RUN and SH3 domain containing 1                                                        | 1.53 | up | 0.000079 | 0.0000014 |
| S100A11 | S100 calcium binding protein A11                                                       | 2.05 | up | 0.000024 | 0.0000001 |
| S100A13 | S100 calcium binding protein A13                                                       | 1.56 | up | 0.000449 | 0.0000316 |
| S100A16 | S100 calcium binding protein A16                                                       | 1.76 | up | 0.000047 | 0.0000005 |
| S100A2  | S100 calcium binding protein A2                                                        | 2.71 | up | 0.000298 | 0.0000161 |
| S100A3  | S100 calcium binding protein A3                                                        | 1.95 | up | 0.000296 | 0.0000159 |
| S100A6  | S100 calcium binding protein A6                                                        | 1.97 | up | 0.004309 | 0.0009295 |
| SAMD4A  | sterile alpha motif domain containing 4A                                               | 1.66 | up | 0.000493 | 0.0000376 |
| SAMD5   | sterile alpha motif domain containing 5                                                | 1.78 | up | 0.000136 | 0.0000040 |
| SAP18   | Sin3A-associated protein, 18kDa                                                        | 1.55 | up | 0.002441 | 0.0004136 |
| SAR1A   | secretion associated, Ras related GTPase 1A                                            | 1.58 | up | 0.000030 | 0.0000002 |
| SAT1    | spermidine/spermine N1-acetyltransferase 1                                             | 2.49 | up | 0.000060 | 0.0000008 |
| SBDS    | Shwachman-Bodian-Diamond syndrome                                                      | 1.54 | up | 0.000878 | 0.0000932 |
| SBDSP1  | Shwachman-Bodian-Diamond syndrome pseudogene 1                                         | 1.72 | up | 0.001029 | 0.0001193 |
| SBSN    | suprabasin                                                                             | 2.41 | up | 0.000398 | 0.0000258 |
| SCPEP1  | serine carboxypeptidase 1                                                              | 1.73 | up | 0.000379 | 0.0000238 |
| SDC1    | syndecan 1                                                                             | 1.57 | up | 0.004621 | 0.0010248 |
| SDC4    | syndecan 4                                                                             | 2.53 | up | 0.000184 | 0.0000067 |
| SDE2    | SDE2 telomere maintenance homolog ( <i>S. pombe</i> )                                  | 2.13 | up | 0.000383 | 0.0000242 |
| SEC24D  | SEC24 family member D                                                                  | 1.54 | up | 0.001067 | 0.0001258 |
| SEC61A1 | Sec61 alpha 1 subunit ( <i>S. cerevisiae</i> )                                         | 1.66 | up | 0.001052 | 0.0001230 |
| SECTM1  | secreted and transmembrane 1                                                           | 1.53 | up | 0.003922 | 0.0008082 |
| SELK    | selenoprotein K                                                                        | 1.58 | up | 0.000639 | 0.0000572 |
| SELM    | selenoprotein M                                                                        | 1.51 | up | 0.000506 | 0.0000396 |
| SEMA3B  | sema domain, immunoglobulin domain (Ig), short basic domain, secreted, (semaphorin) 3B | 2.71 | up | 0.000097 | 0.0000020 |

|          |                                                                                               |      |    |          |           |
|----------|-----------------------------------------------------------------------------------------------|------|----|----------|-----------|
| SEMA7A   | semaphorin 7A, GPI membrane anchor (John Milton Hagen blood group)                            | 2.28 | up | 0.000074 | 0.0000012 |
| SEPP1    | selenoprotein P, plasma, 1                                                                    | 1.57 | up | 0.003598 | 0.0007184 |
| SEPT8    | septin 8                                                                                      | 1.92 | up | 0.004290 | 0.0009234 |
| SERINC1  | serine incorporator 1                                                                         | 1.67 | up | 0.000117 | 0.0000030 |
| SERPINA1 | serpin peptidase inhibitor, clade A (alpha-1 antiproteinase, antitrypsin), member 1           | 2.06 | up | 0.003266 | 0.0006294 |
| SERPINB1 | serpin peptidase inhibitor, clade B (ovalbumin), member 1                                     | 2.03 | up | 0.000039 | 0.0000003 |
| SERPINB5 | serpin peptidase inhibitor, clade B (ovalbumin), member 5                                     | 3.46 | up | 0.000094 | 0.0000019 |
| SERPINB8 | serpin peptidase inhibitor, clade B (ovalbumin), member 8                                     | 3.40 | up | 0.004304 | 0.0009278 |
| SERPINC1 | serpin peptidase inhibitor, clade C (antithrombin), member 1                                  | 2.78 | up | 0.000104 | 0.0000024 |
| SERPINE1 | serpin peptidase inhibitor, clade E (nexin, plasminogen activator inhibitor type 1), member 1 | 5.99 | up | 0.000074 | 0.0000012 |
| SERPINI1 | serpin peptidase inhibitor, clade I (neuroserpin), member 1                                   | 2.17 | up | 0.002965 | 0.0005449 |
| SERTAD1  | SERTA domain containing 1                                                                     | 2.88 | up | 0.000196 | 0.0000074 |
| SESN1    | sestrin 1                                                                                     | 2.64 | up | 0.000097 | 0.0000020 |
| SESN2    | sestrin 2                                                                                     | 1.97 | up | 0.000565 | 0.0000474 |
| SFN      | stratifin                                                                                     | 4.48 | up | 0.003156 | 0.0005973 |
| SGCB     | sarcoglycan, beta (43kDa dystrophin-associated glycoprotein)                                  | 1.63 | up | 0.002774 | 0.0004980 |
| SGK1     | serum/glucocorticoid regulated kinase 1                                                       | 1.84 | up | 0.000254 | 0.0000120 |
| SGMS2    | sphingomyelin synthase 2                                                                      | 1.86 | up | 0.000664 | 0.0000607 |
| SH2B3    | SH2B adaptor protein 3                                                                        | 1.94 | up | 0.003968 | 0.0008241 |
| SH2D3A   | SH2 domain containing 3A                                                                      | 1.64 | up | 0.000129 | 0.0000036 |
| SH3BGR   | SH3 domain binding glutamate-rich protein                                                     | 1.66 | up | 0.001463 | 0.0002011 |
| SH3BGRL3 | SH3 domain binding glutamate-rich protein like 3                                              | 1.51 | up | 0.000525 | 0.0000419 |
| SHC1     | SHC (Src homology 2 domain containing) transforming protein 1                                 | 1.74 | up | 0.000006 | 0.0000000 |
| SHD      | Src homology 2 domain containing transforming protein D                                       | 1.65 | up | 0.000067 | 0.0000010 |
| SHROOM3  | shroom family member 3                                                                        | 1.55 | up | 0.000536 | 0.0000434 |
| SIRT2    | sirtuin 2                                                                                     | 1.82 | up | 0.000500 | 0.0000386 |
| SIRT4    | sirtuin 4                                                                                     | 1.86 | up | 0.001402 | 0.0001899 |



|          |                                                                           |      |    |          |           |
|----------|---------------------------------------------------------------------------|------|----|----------|-----------|
| SLAMF7   | SLAM family member 7                                                      | 3.34 | up | 0.000205 | 0.0000081 |
| SLC10A3  | solute carrier family 10, member 3                                        | 1.52 | up | 0.001600 | 0.0002293 |
| SLC12A4  | solute carrier family 12 (potassium/chloride transporter), member 4       | 2.69 | up | 0.000538 | 0.0000438 |
| SLC25A42 | solute carrier family 25, member 42                                       | 1.69 | up | 0.000489 | 0.0000371 |
| SLC27A2  | solute carrier family 27 (fatty acid transporter), member 2               | 1.57 | up | 0.001733 | 0.0002576 |
| SLC29A3  | solute carrier family 29 (equilibrative nucleoside transporter), member 3 | 1.54 | up | 0.001218 | 0.0001529 |
| SLC30A1  | solute carrier family 30 (zinc transporter), member 1                     | 1.60 | up | 0.000171 | 0.0000059 |
| SLC30A4  | solute carrier family 30 (zinc transporter), member 4                     | 1.83 | up | 0.000528 | 0.0000425 |
| SLC31A2  | solute carrier family 31 (copper transporter), member 2                   | 1.72 | up | 0.000626 | 0.0000553 |
| SLC44A3  | solute carrier family 44, member 3                                        | 1.60 | up | 0.004672 | 0.0010432 |
| SLC48A1  | solute carrier family 48 (heme transporter), member 1                     | 1.99 | up | 0.000088 | 0.0000016 |
| SLC52A3  | solute carrier family 52 (riboflavin transporter), member 3               | 1.87 | up | 0.000878 | 0.0000932 |
| SLC6A6   | solute carrier family 6 (neurotransmitter transporter), member 6          | 1.78 | up | 0.001432 | 0.0001955 |
| SMIM14   | small integral membrane protein 14                                        | 1.76 | up | 0.000069 | 0.0000011 |
| SMIM22   | small integral membrane protein 22                                        | 1.74 | up | 0.003676 | 0.0007386 |
| SMIM5    | small integral membrane protein 5                                         | 3.72 | up | 0.001520 | 0.0002136 |
| SMPD1    | sphingomyelin phosphodiesterase 1, acid lysosomal                         | 4.18 | up | 0.000698 | 0.0000652 |
| SMPDL3A  | sphingomyelin phosphodiesterase, acid-like 3A                             | 1.59 | up | 0.003192 | 0.0006074 |
| SMPDL3B  | sphingomyelin phosphodiesterase, acid-like 3B                             | 2.02 | up | 0.001747 | 0.0002608 |
| SNX2     | sorting nexin 2                                                           | 1.55 | up | 0.002525 | 0.0004351 |
| SNX7     | sorting nexin 7                                                           | 1.68 | up | 0.000120 | 0.0000031 |
| SOCS4    | suppressor of cytokine signaling 4                                        | 1.61 | up | 0.000694 | 0.0000646 |
| SOD2     | superoxide dismutase 2, mitochondrial                                     | 1.56 | up | 0.000307 | 0.0000169 |
| SORCS2   | sortilin-related VPS10 domain containing receptor 2                       | 4.71 | up | 0.000254 | 0.0000120 |
| SPAG1    | sperm associated antigen 1                                                | 2.85 | up | 0.001362 | 0.0001807 |
| SPCS3    | signal peptidase complex subunit 3 homolog ( <i>S. cerevisiae</i> )       | 1.58 | up | 0.000051 | 0.0000006 |
| SPINT1   | serine peptidase inhibitor, Kunitz type 1                                 | 1.53 | up | 0.001238 | 0.0001567 |
| SPNS2    | spinster homolog 2 ( <i>Drosophila</i> )                                  | 3.21 | up | 0.000120 | 0.0000032 |

|            |                                                                                                               |      |    |          |           |
|------------|---------------------------------------------------------------------------------------------------------------|------|----|----------|-----------|
| SPNS3      | spinster homolog 3 (Drosophila)                                                                               | 2.37 | up | 0.001113 | 0.0001339 |
| SPOCD1     | SPOC domain containing 1                                                                                      | 2.39 | up | 0.000864 | 0.0000908 |
| SPP1       | secreted phosphoprotein 1                                                                                     | 3.00 | up | 0.000057 | 0.0000007 |
| SPTSSA     | serine palmitoyltransferase, small subunit A                                                                  | 1.55 | up | 0.002331 | 0.0003870 |
| SQRDL      | sulfide quinone reductase-like (yeast)                                                                        | 1.54 | up | 0.000185 | 0.0000068 |
| SRP19      | signal recognition particle 19kDa                                                                             | 1.97 | up | 0.001086 | 0.0001292 |
| SSH2       | slingshot protein phosphatase 2                                                                               | 2.51 | up | 0.000415 | 0.0000275 |
| SSR1       | signal sequence receptor, alpha                                                                               | 1.66 | up | 0.001924 | 0.0003001 |
| ST6GALNAC2 | ST6 (alpha-N-acetyl-neuraminy1-2,3-beta-galactosyl-1,3)-N-acetylgalactosaminide alpha-2,6-sialyltransferase 2 | 1.80 | up | 0.000727 | 0.0000694 |
| STARD10    | StAR-related lipid transfer (START) domain containing 10                                                      | 1.67 | up | 0.001661 | 0.0002422 |
| STAT3      | signal transducer and activator of transcription 3 (acute-phase response factor)                              | 1.57 | up | 0.000480 | 0.0000357 |
| STAT4      | signal transducer and activator of transcription 4                                                            | 2.79 | up | 0.000294 | 0.0000158 |
| STMN1      | stathmin 1                                                                                                    | 4.04 | up | 0.003044 | 0.0005664 |
| STOM       | stomatin                                                                                                      | 2.08 | up | 0.000955 | 0.0001065 |
| STPG1      | sperm-tail PG-rich repeat containing 1                                                                        | 1.92 | up | 0.003962 | 0.0008227 |
| STX11      | syntaxin 11                                                                                                   | 2.20 | up | 0.001753 | 0.0002621 |
| STYK1      | serine/threonine/tyrosine kinase 1                                                                            | 2.27 | up | 0.000261 | 0.0000127 |
| SULF2      | sulfatase 2                                                                                                   | 3.35 | up | 0.000107 | 0.0000025 |
| SULT2B1    | sulfotransferase family, cytosolic, 2B, member 1                                                              | 1.79 | up | 0.000228 | 0.0000099 |
| SUN3       | Sad1 and UNC84 domain containing 3                                                                            | 1.69 | up | 0.001199 | 0.0001491 |
| SUPT7L     | suppressor of Ty 7 (S. cerevisiae)-like                                                                       | 2.50 | up | 0.002014 | 0.0003185 |
| SYK        | spleen tyrosine kinase                                                                                        | 1.66 | up | 0.000204 | 0.0000080 |
| SYNE1      | spectrin repeat containing, nuclear envelope 1                                                                | 2.37 | up | 0.001269 | 0.0001630 |
| SYNJ1      | synaptojanin 1                                                                                                | 1.99 | up | 0.000951 | 0.0001058 |
| SYT17      | synaptotagmin XVII                                                                                            | 1.54 | up | 0.003056 | 0.0005698 |
| SYTL3      | synaptotagmin-like 3                                                                                          | 1.52 | up | 0.002779 | 0.0004993 |
| TAC3       | tachykinin 3                                                                                                  | 5.10 | up | 0.000181 | 0.0000065 |
| TACSTD2    | tumor-associated calcium signal transducer 2                                                                  | 3.23 | up | 0.000277 | 0.0000140 |

|          |                                                                                          |      |    |          |           |
|----------|------------------------------------------------------------------------------------------|------|----|----------|-----------|
| TAP1     | transporter 1, ATP-binding cassette, sub-family B (MDR/TAP)                              | 2.31 | up | 0.001140 | 0.0001389 |
| TAPT1    | transmembrane anterior posterior transformation 1                                        | 1.57 | up | 0.004519 | 0.0009929 |
| TBC1D1   | TBC1 (tre-2/USP6, BUB2, cdc16) domain family, member 1                                   | 1.89 | up | 0.000288 | 0.0000150 |
| TBC1D10A | TBC1 domain family, member 10A                                                           | 1.67 | up | 0.000642 | 0.0000577 |
| TBC1D2   | TBC1 domain family, member 2                                                             | 2.00 | up | 0.000063 | 0.0000009 |
| TBXA2R   | thromboxane A2 receptor                                                                  | 1.84 | up | 0.000135 | 0.0000039 |
| TCF19    | transcription factor 19                                                                  | 3.68 | up | 0.000116 | 0.0000029 |
| TCIRG1   | T-cell, immune regulator 1, ATPase, H <sup>+</sup> transporting, lysosomal V0 subunit A3 | 1.70 | up | 0.003526 | 0.0006977 |
| TEP1     | telomerase-associated protein 1                                                          | 1.95 | up | 0.000116 | 0.0000029 |
| TERF2IP  | telomeric repeat binding factor 2, interacting protein                                   | 2.23 | up | 0.000219 | 0.0000091 |
| TFAP2C   | transcription factor AP-2 gamma (activating enhancer binding protein 2 gamma)            | 2.12 | up | 0.000244 | 0.0000110 |
| TFEB     | transcription factor EB                                                                  | 1.66 | up | 0.000294 | 0.0000157 |
| TFPI     | tissue factor pathway inhibitor (lipoprotein-associated coagulation inhibitor)           | 1.66 | up | 0.001684 | 0.0002470 |
| TGFA     | transforming growth factor, alpha                                                        | 2.84 | up | 0.000202 | 0.0000078 |
| TGFB1    | transforming growth factor, beta 1                                                       | 1.63 | up | 0.000180 | 0.0000064 |
| TGM1     | transglutaminase 1                                                                       | 1.94 | up | 0.003380 | 0.0006594 |
| TGM2     | transglutaminase 2                                                                       | 2.83 | up | 0.000237 | 0.0000105 |
| TGOLN2   | trans-golgi network protein 2                                                            | 1.64 | up | 0.000102 | 0.0000022 |
| THAP10   | THAP domain containing 10                                                                | 1.94 | up | 0.000047 | 0.0000005 |
| THBD     | thrombomodulin                                                                           | 2.14 | up | 0.000247 | 0.0000113 |
| TICAM1   | toll-like receptor adaptor molecule 1                                                    | 1.52 | up | 0.000398 | 0.0000258 |
| TIMP1    | TIMP metalloproteinase inhibitor 1                                                       | 1.62 | up | 0.000280 | 0.0000143 |
| TLDC1    | TBC/LysM-associated domain containing 1                                                  | 2.19 | up | 0.000359 | 0.0000218 |
| TLR1     | toll-like receptor 1                                                                     | 2.37 | up | 0.000389 | 0.0000250 |
| TLR3     | toll-like receptor 3                                                                     | 4.42 | up | 0.000042 | 0.0000004 |
| TM9SF2   | transmembrane 9 superfamily member 2                                                     | 1.60 | up | 0.000086 | 0.0000016 |
| TMC8     | transmembrane channel-like 8                                                             | 2.27 | up | 0.000418 | 0.0000279 |
| TMCC2    | transmembrane and coiled-coil domain family 2                                            | 3.04 | up | 0.000087 | 0.0000016 |

|           |                                                              |      |    |          |           |
|-----------|--------------------------------------------------------------|------|----|----------|-----------|
| TMCC3     | transmembrane and coiled-coil domain family 3                | 1.79 | up | 0.000047 | 0.0000005 |
| TMEM106C  | transmembrane protein 106C                                   | 1.54 | up | 0.000929 | 0.0001019 |
| TMEM121   | transmembrane protein 121                                    | 1.72 | up | 0.002638 | 0.0004635 |
| TMEM125   | transmembrane protein 125                                    | 1.84 | up | 0.000253 | 0.0000118 |
| TMEM139   | transmembrane protein 139                                    | 1.98 | up | 0.000483 | 0.0000362 |
| TMEM158   | transmembrane protein 158 (gene/pseudogene)                  | 1.65 | up | 0.004428 | 0.0009656 |
| TMEM159   | transmembrane protein 159                                    | 1.53 | up | 0.001380 | 0.0001847 |
| TMEM173   | transmembrane protein 173                                    | 1.95 | up | 0.000059 | 0.0000008 |
| TMEM185B  | transmembrane protein 185B                                   | 1.84 | up | 0.002239 | 0.0003669 |
| TMEM191A  | transmembrane protein 191A (pseudogene)                      | 1.70 | up | 0.000432 | 0.0000295 |
| TMEM191B  | transmembrane protein 191B                                   | 1.71 | up | 0.000309 | 0.0000171 |
| TMEM194A  | transmembrane protein 194A                                   | 1.76 | up | 0.003327 | 0.0006466 |
| TMEM234   | transmembrane protein 234                                    | 1.74 | up | 0.003145 | 0.0005942 |
| TMEM255B  | transmembrane protein 255B                                   | 1.63 | up | 0.001052 | 0.0001230 |
| TMEM38B   | transmembrane protein 38B                                    | 1.70 | up | 0.001594 | 0.0002280 |
| TMEM40    | transmembrane protein 40                                     | 4.37 | up | 0.000080 | 0.0000014 |
| TMEM59    | transmembrane protein 59                                     | 1.99 | up | 0.000053 | 0.0000006 |
| TMEM59L   | transmembrane protein 59-like                                | 1.64 | up | 0.000103 | 0.0000023 |
| TMEM61    | transmembrane protein 61                                     | 2.17 | up | 0.000041 | 0.0000003 |
| TMEM79    | transmembrane protein 79                                     | 2.35 | up | 0.001892 | 0.0002932 |
| TMEM92    | transmembrane protein 92                                     | 1.81 | up | 0.000715 | 0.0000675 |
| TMOD1     | tropomodulin 1                                               | 1.96 | up | 0.001400 | 0.0001891 |
| TMOD3     | tropomodulin 3 (ubiquitous)                                  | 1.62 | up | 0.000683 | 0.0000632 |
| TMPRSS4   | transmembrane protease, serine 4                             | 3.71 | up | 0.004608 | 0.0010200 |
| TMPRSS7   | transmembrane protease, serine 7                             | 5.34 | up | 0.001061 | 0.0001249 |
| TNFAIP1   | tumor necrosis factor, alpha-induced protein 1 (endothelial) | 1.84 | up | 0.000601 | 0.0000519 |
| TNFAIP2   | tumor necrosis factor, alpha-induced protein 2               | 2.00 | up | 0.000170 | 0.0000058 |
| TNFAIP8   | tumor necrosis factor, alpha-induced protein 8               | 1.50 | up | 0.004547 | 0.0010017 |
| TNFRSF10A | tumor necrosis factor receptor superfamily, member 10a       | 1.77 | up | 0.001156 | 0.0001417 |
| TNFRSF10B | tumor necrosis factor receptor superfamily, member 10b       | 1.89 | up | 0.000384 | 0.0000244 |

|           |                                                                                               |      |    |          |           |
|-----------|-----------------------------------------------------------------------------------------------|------|----|----------|-----------|
| TNFRSF10C | tumor necrosis factor receptor superfamily, member 10c, decoy without an intracellular domain | 2.62 | up | 0.000865 | 0.0000910 |
| TNFRSF10D | tumor necrosis factor receptor superfamily, member 10d, decoy with truncated death domain     | 1.83 | up | 0.000216 | 0.0000089 |
| TNFRSF25  | tumor necrosis factor receptor superfamily, member 25                                         | 1.61 | up | 0.004670 | 0.0010418 |
| TNFRSF6B  | tumor necrosis factor receptor superfamily, member 6b, decoy                                  | 1.80 | up | 0.000427 | 0.0000288 |
| TNK2      | tyrosine kinase, non-receptor, 2                                                              | 1.54 | up | 0.000205 | 0.0000081 |
| TNNC1     | troponin C type 1 (slow)                                                                      | 1.78 | up | 0.001404 | 0.0001902 |
| TNNI2     | troponin I type 2 (skeletal, fast)                                                            | 6.95 | up | 0.000456 | 0.0000326 |
| TNXB      | tenascin XB                                                                                   | 1.80 | up | 0.001240 | 0.0001572 |
| TOB1      | transducer of ERBB2, 1                                                                        | 1.66 | up | 0.000268 | 0.0000132 |
| TOR1B     | torsin family 1, member B (torsin B)                                                          | 1.68 | up | 0.000201 | 0.0000077 |
| TP53I11   | tumor protein p53 inducible protein 11                                                        | 1.59 | up | 0.000448 | 0.0000315 |
| TP53I3    | tumor protein p53 inducible protein 3                                                         | 5.24 | up | 0.000027 | 0.0000001 |
| TP53INP1  | tumor protein p53 inducible nuclear protein 1                                                 | 3.71 | up | 0.000051 | 0.0000006 |
| TPM1      | tropomyosin 1 (alpha)                                                                         | 1.67 | up | 0.004689 | 0.0010475 |
| TPST1     | tyrosylprotein sulfotransferase 1                                                             | 1.55 | up | 0.000505 | 0.0000394 |
| TRAF4     | TNF receptor-associated factor 4                                                              | 1.75 | up | 0.000205 | 0.0000082 |
| TRAPPC2P1 | trafficking protein particle complex 2 pseudogene 1                                           | 1.61 | up | 0.000482 | 0.0000361 |
| TRIAP1    | TP53 regulated inhibitor of apoptosis 1                                                       | 2.10 | up | 0.000136 | 0.0000040 |
| TRIM15    | tripartite motif containing 15                                                                | 2.05 | up | 0.003232 | 0.0006176 |
| TRIM29    | tripartite motif containing 29                                                                | 3.36 | up | 0.000630 | 0.0000558 |
| TRIM68    | tripartite motif containing 68                                                                | 1.65 | up | 0.000710 | 0.0000666 |
| TRIM8     | tripartite motif containing 8                                                                 | 2.05 | up | 0.000046 | 0.0000005 |
| TRIML2    | tripartite motif family-like 2                                                                | 2.33 | up | 0.000149 | 0.0000046 |
| TRIP6     | thyroid hormone receptor interactor 6                                                         | 1.72 | up | 0.000743 | 0.0000722 |
| TSC22D3   | TSC22 domain family, member 3                                                                 | 2.14 | up | 0.000858 | 0.0000897 |
| TSPAN1    | tetraspanin 1                                                                                 | 2.24 | up | 0.000026 | 0.0000001 |
| TSPAN14   | tetraspanin 14                                                                                | 1.65 | up | 0.000406 | 0.0000266 |
| TSPAN7    | tetraspanin 7                                                                                 | 1.66 | up | 0.000723 | 0.0000688 |

|           |                                                                                |      |    |          |           |
|-----------|--------------------------------------------------------------------------------|------|----|----------|-----------|
| TSPYL4    | TSPY-like 4                                                                    | 1.56 | up | 0.000528 | 0.0000423 |
| TTC28-AS1 | TTC28 antisense RNA 1                                                          | 4.99 | up | 0.000396 | 0.0000255 |
| TTC39A    | tetratricopeptide repeat domain 39A                                            | 1.63 | up | 0.000336 | 0.0000197 |
| TUFT1     | tuftelin 1                                                                     | 2.29 | up | 0.000136 | 0.0000040 |
| TXNDC17   | thioredoxin domain containing 17                                               | 1.61 | up | 0.000740 | 0.0000711 |
| UBC       | ubiquitin C                                                                    | 1.60 | up | 0.001959 | 0.0003075 |
| UBFD1     | ubiquitin family domain containing 1                                           | 2.28 | up | 0.000045 | 0.0000005 |
| UBL3      | ubiquitin-like 3                                                               | 1.66 | up | 0.000554 | 0.0000460 |
| UCK1      | uridine-cytidine kinase 1                                                      | 1.55 | up | 0.003060 | 0.0005715 |
| UCN2      | urocortin 2                                                                    | 2.02 | up | 0.001219 | 0.0001531 |
| UFD1L     | ubiquitin fusion degradation 1 like (yeast)                                    | 1.63 | up | 0.000298 | 0.0000162 |
| UHRF2     | ubiquitin-like with PHD and ring finger domains 2, E3 ubiquitin protein ligase | 1.61 | up | 0.000089 | 0.0000017 |
| ULBP2     | UL16 binding protein 2                                                         | 4.29 | up | 0.000027 | 0.0000001 |
| ULK1      | unc-51 like autophagy activating kinase 1                                      | 1.69 | up | 0.000026 | 0.0000001 |
| ULK4P1    | ULK4 pseudogene 1                                                              | 1.64 | up | 0.001592 | 0.0002270 |
| UNC13D    | unc-13 homolog D (C. elegans)                                                  | 2.08 | up | 0.002277 | 0.0003744 |
| UNC5B-AS1 | UNC5B antisense RNA 1                                                          | 5.23 | up | 0.000041 | 0.0000003 |
| UPP1      | uridine phosphorylase 1                                                        | 2.09 | up | 0.000117 | 0.0000030 |
| USP11     | ubiquitin specific peptidase 11                                                | 1.58 | up | 0.003486 | 0.0006860 |
| USP18     | ubiquitin specific peptidase 18                                                | 1.84 | up | 0.000782 | 0.0000780 |
| USP35     | ubiquitin specific peptidase 35                                                | 1.86 | up | 0.000582 | 0.0000495 |
| USP53     | ubiquitin specific peptidase 53                                                | 1.65 | up | 0.000742 | 0.0000717 |
| VAMP8     | vesicle-associated membrane protein 8                                          | 1.80 | up | 0.000228 | 0.0000099 |
| VASN      | vasorin                                                                        | 1.91 | up | 0.000977 | 0.0001105 |
| VCAN      | versican                                                                       | 1.70 | up | 0.000317 | 0.0000178 |
| VDR       | vitamin D (1,25- dihydroxyvitamin D3) receptor                                 | 1.57 | up | 0.000548 | 0.0000450 |
| VEPH1     | ventricular zone expressed PH domain-containing 1                              | 1.79 | up | 0.004307 | 0.0009287 |
| VPS37D    | vacuolar protein sorting 37 homolog D (S. cerevisiae)                          | 1.55 | up | 0.000309 | 0.0000171 |
| WBSCR28   | Williams-Beuren syndrome chromosome region 28                                  | 2.90 | up | 0.001121 | 0.0001353 |

|         |                                                                             |      |    |          |           |
|---------|-----------------------------------------------------------------------------|------|----|----------|-----------|
| WFDC1   | WAP four-disulfide core domain 1                                            | 3.36 | up | 0.000041 | 0.0000003 |
| WHAMM   | WAS protein homolog associated with actin, golgi membranes and microtubules | 1.75 | up | 0.000047 | 0.0000005 |
| WIPI1   | WD repeat domain, phosphoinositide interacting 1                            | 1.50 | up | 0.001026 | 0.0001188 |
| WLS     | wntless Wnt ligand secretion mediator                                       | 1.76 | up | 0.001658 | 0.0002410 |
| WNT7A   | wingless-type MMTV integration site family, member 7A                       | 7.33 | up | 0.000380 | 0.0000240 |
| WNT7B   | wingless-type MMTV integration site family, member 7B                       | 2.67 | up | 0.000613 | 0.0000534 |
| WRAP73  | WD repeat containing, antisense to TP73                                     | 1.54 | up | 0.000750 | 0.0000730 |
| WWTR1   | WW domain containing transcription regulator 1                              | 2.46 | up | 0.000029 | 0.0000002 |
| XRCC3   | X-ray repair complementing defective repair in Chinese hamster cells 3      | 1.55 | up | 0.001238 | 0.0001568 |
| YBX3    | Y box binding protein 3                                                     | 1.53 | up | 0.000505 | 0.0000395 |
| YPEL3   | yippee-like 3 (Drosophila)                                                  | 4.72 | up | 0.000195 | 0.0000074 |
| YPEL5   | yippee-like 5 (Drosophila)                                                  | 2.63 | up | 0.000020 | 0.0000000 |
| ZCCHC12 | zinc finger, CCHC domain containing 12                                      | 2.80 | up | 0.000915 | 0.0000992 |
| ZFP36L2 | ZFP36 ring finger protein-like 2                                            | 1.51 | up | 0.000162 | 0.0000052 |
| ZFYVE1  | zinc finger, FYVE domain containing 1                                       | 2.17 | up | 0.000092 | 0.0000018 |
| ZNF177  | zinc finger protein 177                                                     | 1.50 | up | 0.002753 | 0.0004917 |
| ZNF219  | zinc finger protein 219                                                     | 2.18 | up | 0.000060 | 0.0000008 |
| ZNF226  | zinc finger protein 226                                                     | 1.65 | up | 0.001237 | 0.0001564 |
| ZNF250  | zinc finger protein 250                                                     | 1.62 | up | 0.000670 | 0.0000614 |
| ZNF34   | zinc finger protein 34                                                      | 1.85 | up | 0.001520 | 0.0002132 |
| ZNF341  | zinc finger protein 341                                                     | 1.51 | up | 0.000301 | 0.0000165 |
| ZNF354B | zinc finger protein 354B                                                    | 1.85 | up | 0.003912 | 0.0008056 |
| ZNF416  | zinc finger protein 416                                                     | 1.52 | up | 0.003985 | 0.0008294 |
| ZNF430  | zinc finger protein 430                                                     | 1.62 | up | 0.003974 | 0.0008264 |
| ZNF442  | zinc finger protein 442                                                     | 1.63 | up | 0.001925 | 0.0003003 |
| ZNF488  | zinc finger protein 488                                                     | 1.74 | up | 0.003256 | 0.0006264 |
| ZNF555  | zinc finger protein 555                                                     | 1.59 | up | 0.000347 | 0.0000210 |
| ZNF564  | zinc finger protein 564                                                     | 1.70 | up | 0.002145 | 0.0003464 |

|         |                                                                                  |      |      |          |           |
|---------|----------------------------------------------------------------------------------|------|------|----------|-----------|
| ZNF600  | zinc finger protein 600                                                          | 2.15 | up   | 0.000231 | 0.0000101 |
| ZNF641  | zinc finger protein 641                                                          | 1.55 | up   | 0.000864 | 0.0000908 |
| ZNF654  | zinc finger protein 654                                                          | 2.08 | up   | 0.000217 | 0.0000089 |
| ZNF672  | zinc finger protein 672                                                          | 1.55 | up   | 0.001119 | 0.0001349 |
| ZNF684  | zinc finger protein 684                                                          | 1.89 | up   | 0.004137 | 0.0008731 |
| ZNF703  | zinc finger protein 703                                                          | 2.57 | up   | 0.001220 | 0.0001533 |
| ZNF79   | zinc finger protein 79                                                           | 2.75 | up   | 0.000014 | 0.0000000 |
| ZRSR2   | zinc finger (CCCH type), RNA-binding motif and serine/arginine rich 2            | 1.61 | up   | 0.000261 | 0.0000127 |
| ZSCAN20 | zinc finger and SCAN domain containing 20                                        | 1.61 | up   | 0.000802 | 0.0000808 |
| ZSWIM3  | zinc finger, SWIM-type containing 3                                              | 2.44 | up   | 0.000515 | 0.0000409 |
|         |                                                                                  |      |      |          |           |
| A2M-AS1 | A2M antisense RNA 1                                                              | 1.61 | down | 0.003309 | 0.0006414 |
| AAAS    | achalasia, adrenocortical insufficiency, alacrimia                               | 1.60 | down | 0.003817 | 0.0007749 |
| AATK    | apoptosis-associated tyrosine kinase                                             | 5.66 | down | 0.000014 | 0.0000000 |
| ABHD11  | abhydrolase domain containing 11                                                 | 1.58 | down | 0.000803 | 0.0000809 |
| ABHD14B | abhydrolase domain containing 14B                                                | 1.68 | down | 0.000916 | 0.0000994 |
| ABLIM2  | actin binding LIM protein family, member 2                                       | 7.05 | down | 0.000532 | 0.0000429 |
| ACACA   | acetyl-CoA carboxylase alpha                                                     | 1.52 | down | 0.000366 | 0.0000227 |
| ACAD9   | acyl-CoA dehydrogenase family, member 9                                          | 1.62 | down | 0.000103 | 0.0000023 |
| ACADS   | acyl-CoA dehydrogenase, C-2 to C-3 short chain                                   | 1.64 | down | 0.004722 | 0.0010563 |
| ACADSB  | acyl-CoA dehydrogenase, short/branched chain                                     | 2.01 | down | 0.000376 | 0.0000235 |
| ACCS    | 1-aminocyclopropane-1-carboxylate synthase homolog (Arabidopsis)(non-functional) | 2.09 | down | 0.000442 | 0.0000307 |
| ACSL3   | acyl-CoA synthetase long-chain family member 3                                   | 2.58 | down | 0.000565 | 0.0000474 |
| ACSL5   | acyl-CoA synthetase long-chain family member 5                                   | 1.89 | down | 0.000066 | 0.0000010 |
| ACSM3   | acyl-CoA synthetase medium-chain family member 3                                 | 1.80 | down | 0.000548 | 0.0000451 |
| ACTR1B  | ARP1 actin-related protein 1 homolog B, contractin beta (yeast)                  | 1.59 | down | 0.001006 | 0.0001155 |
| ACTR3B  | ARP3 actin-related protein 3 homolog B (yeast)                                   | 1.79 | down | 0.000459 | 0.0000330 |
| ADCK1   | aarF domain containing kinase 1                                                  | 3.18 | down | 0.002012 | 0.0003180 |



|           |                                                                         |      |      |          |           |
|-----------|-------------------------------------------------------------------------|------|------|----------|-----------|
| ADCY3     | adenylate cyclase 3                                                     | 1.59 | down | 0.000656 | 0.0000594 |
| AEBP2     | AE binding protein 2                                                    | 1.51 | down | 0.000074 | 0.0000012 |
| AFAP1     | actin filament associated protein 1                                     | 1.64 | down | 0.001911 | 0.0002971 |
| AGFG1     | ArfGAP with FG repeats 1                                                | 2.30 | down | 0.004440 | 0.0009698 |
| AGGF1     | angiogenic factor with G patch and FHA domains 1                        | 1.79 | down | 0.000114 | 0.0000028 |
| AGPAT5    | 1-acylglycerol-3-phosphate O-acyltransferase 5                          | 2.07 | down | 0.000028 | 0.0000002 |
| AGPS      | alkylglycerone phosphate synthase                                       | 2.64 | down | 0.000102 | 0.0000022 |
| AIMP2     | aminoacyl tRNA synthetase complex-interacting multifunctional protein 2 | 1.63 | down | 0.001371 | 0.0001826 |
| AK2       | adenylate kinase 2                                                      | 1.99 | down | 0.000259 | 0.0000125 |
| AK8       | adenylate kinase 8                                                      | 1.63 | down | 0.001070 | 0.0001266 |
| AKT2      | v-akt murine thymoma viral oncogene homolog 2                           | 1.71 | down | 0.001974 | 0.0003102 |
| ALKBH3    | alkB, alkylation repair homolog 3 (E. coli)                             | 1.55 | down | 0.001059 | 0.0001245 |
| AMD1      | adenosylmethionine decarboxylase 1                                      | 1.78 | down | 0.000459 | 0.0000331 |
| ANAPC1    | anaphase promoting complex subunit 1                                    | 1.65 | down | 0.002028 | 0.0003213 |
| ANKRD11   | ankyrin repeat domain 11                                                | 1.55 | down | 0.003098 | 0.0005826 |
| ANKRD18DP | ankyrin repeat domain 18D, pseudogene                                   | 2.49 | down | 0.004325 | 0.0009343 |
| ANKRD28   | ankyrin repeat domain 28                                                | 1.53 | down | 0.004395 | 0.0009538 |
| ANP32B    | acidic (leucine-rich) nuclear phosphoprotein 32 family, member B        | 1.69 | down | 0.000206 | 0.0000082 |
| ANP32E    | acidic (leucine-rich) nuclear phosphoprotein 32 family, member E        | 1.56 | down | 0.001170 | 0.0001442 |
| AOC3      | amine oxidase, copper containing 3                                      | 1.64 | down | 0.001775 | 0.0002669 |
| AP1S3     | adaptor-related protein complex 1, sigma 3 subunit                      | 1.52 | down | 0.004866 | 0.0010984 |
| APEH      | acylaminoacyl-peptide hydrolase                                         | 1.57 | down | 0.000692 | 0.0000643 |
| APOM      | apolipoprotein M                                                        | 2.87 | down | 0.001335 | 0.0001753 |
| ARFRP1    | ADP-ribosylation factor related protein 1                               | 2.53 | down | 0.000664 | 0.0000606 |
| ARHGAP11A | Rho GTPase activating protein 11A                                       | 2.25 | down | 0.000250 | 0.0000116 |
| ARHGAP11B | Rho GTPase activating protein 11B                                       | 1.79 | down | 0.000364 | 0.0000225 |
| ARHGAP19  | Rho GTPase activating protein 19                                        | 2.57 | down | 0.000505 | 0.0000394 |
| ARHGAP26  | Rho GTPase activating protein 26                                        | 1.93 | down | 0.001230 | 0.0001552 |

|          |                                                                      |      |      |          |           |
|----------|----------------------------------------------------------------------|------|------|----------|-----------|
| ARHGAP35 | Rho GTPase activating protein 35                                     | 1.50 | down | 0.000219 | 0.0000091 |
| ARHGAP5  | Rho GTPase activating protein 5                                      | 2.32 | down | 0.001775 | 0.0002673 |
| ARHGEF39 | Rho guanine nucleotide exchange factor (GEF) 39                      | 2.52 | down | 0.000872 | 0.0000921 |
| ARID2    | AT rich interactive domain 2 (ARID, RFX-like)                        | 1.78 | down | 0.000938 | 0.0001036 |
| ARIH2    | ariadne RBR E3 ubiquitin protein ligase 2                            | 1.78 | down | 0.000022 | 0.0000001 |
| ARL4A    | ADP-ribosylation factor-like 4A                                      | 1.65 | down | 0.000049 | 0.0000005 |
| ARL6IP1  | ADP-ribosylation factor-like 6 interacting protein 1                 | 1.53 | down | 0.000057 | 0.0000007 |
| ARMC3    | armadillo repeat containing 3                                        | 2.70 | down | 0.003706 | 0.0007469 |
| ARMC4    | armadillo repeat containing 4                                        | 1.70 | down | 0.000774 | 0.0000768 |
| ARMC8    | armadillo repeat containing 8                                        | 1.87 | down | 0.003021 | 0.0005610 |
| ASB13    | ankyrin repeat and SOCS box containing 13                            | 1.54 | down | 0.002761 | 0.0004937 |
| ASIC1    | acid-sensing (proton-gated) ion channel 1                            | 1.61 | down | 0.001175 | 0.0001452 |
| ASPM     | asp (abnormal spindle) homolog, microcephaly associated (Drosophila) | 2.27 | down | 0.000569 | 0.0000479 |
| ASPRV1   | aspartic peptidase, retroviral-like 1                                | 2.08 | down | 0.002318 | 0.0003843 |
| ATAD2B   | ATPase family, AAA domain containing 2B                              | 2.04 | down | 0.000698 | 0.0000651 |
| ATF4     | activating transcription factor 4                                    | 1.59 | down | 0.004046 | 0.0008473 |
| ATF7IP   | activating transcription factor 7 interacting protein                | 1.62 | down | 0.000006 | 0.0000000 |
| ATP11C   | ATPase, class VI, type 11C                                           | 1.62 | down | 0.000253 | 0.0000118 |
| ATP6V1E2 | ATPase, H <sup>+</sup> transporting, lysosomal 31kDa, V1 subunit E2  | 2.09 | down | 0.000297 | 0.0000161 |
| ATR      | ataxia telangiectasia and Rad3 related                               | 1.51 | down | 0.000794 | 0.0000799 |
| ATXN10   | ataxin 10                                                            | 1.62 | down | 0.000644 | 0.0000579 |
| ATXN1L   | ataxin 1-like                                                        | 1.50 | down | 0.004158 | 0.0008814 |
| AURKA    | aurora kinase A                                                      | 2.15 | down | 0.000280 | 0.0000143 |
| AURKAPS1 | aurora kinase A pseudogene 1                                         | 1.96 | down | 0.000121 | 0.0000032 |
| AXIN2    | axin 2                                                               | 2.30 | down | 0.002618 | 0.0004582 |
| AZI2     | 5-azacytidine induced 2                                              | 1.55 | down | 0.001676 | 0.0002455 |
| AZIN1    | antizyme inhibitor 1                                                 | 1.61 | down | 0.000601 | 0.0000520 |
| B3GALNT2 | beta-1,3-N-acetylgalactosaminyltransferase 2                         | 1.55 | down | 0.001084 | 0.0001289 |
| B9D1     | B9 protein domain 1                                                  | 1.63 | down | 0.000477 | 0.0000351 |

|          |                                                              |      |      |          |           |
|----------|--------------------------------------------------------------|------|------|----------|-----------|
| BAHCC1   | BAH domain and coiled-coil containing 1                      | 1.54 | down | 0.003685 | 0.0007410 |
| BAIAP2   | BAI1-associated protein 2                                    | 2.09 | down | 0.000713 | 0.0000671 |
| BANK1    | B-cell scaffold protein with ankyrin repeats 1               | 2.53 | down | 0.000047 | 0.0000005 |
| BCKDHB   | branched chain keto acid dehydrogenase E1, beta polypeptide  | 1.54 | down | 0.003890 | 0.0007980 |
| BCL2L12  | BCL2-like 12 (proline rich)                                  | 1.50 | down | 0.000798 | 0.0000803 |
| BCOR     | BCL6 corepressor                                             | 2.86 | down | 0.000480 | 0.0000356 |
| BCR      | breakpoint cluster region                                    | 1.78 | down | 0.000271 | 0.0000135 |
| BDNF     | brain-derived neurotrophic factor                            | 2.28 | down | 0.000791 | 0.0000793 |
| BEND3    | BEN domain containing 3                                      | 2.39 | down | 0.000102 | 0.0000022 |
| BET1     | Bet1 golgi vesicular membrane trafficking protein            | 1.90 | down | 0.001369 | 0.0001822 |
| BIRC5    | baculoviral IAP repeat containing 5                          | 1.50 | down | 0.000362 | 0.0000221 |
| BMP4     | bone morphogenetic protein 4                                 | 1.67 | down | 0.000120 | 0.0000031 |
| BORA     | bora, aurora kinase A activator                              | 1.69 | down | 0.000477 | 0.0000351 |
| BPHL     | biphenyl hydrolase-like (serine hydrolase)                   | 1.82 | down | 0.000624 | 0.0000549 |
| BRWD1    | bromodomain and WD repeat domain containing 1                | 2.38 | down | 0.000159 | 0.0000051 |
| BUB1     | BUB1 mitotic checkpoint serine/threonine kinase              | 2.07 | down | 0.000103 | 0.0000023 |
| BUB1B    | BUB1 mitotic checkpoint serine/threonine kinase B            | 2.26 | down | 0.000117 | 0.0000030 |
| C17orf82 | chromosome 17 open reading frame 82                          | 1.82 | down | 0.001600 | 0.0002292 |
| C1orf213 | chromosome 1 open reading frame 213                          | 1.56 | down | 0.003880 | 0.0007927 |
| C1orf233 | chromosome 1 open reading frame 233                          | 1.51 | down | 0.003820 | 0.0007758 |
| C1RL     | complement component 1, r subcomponent-like                  | 2.21 | down | 0.000844 | 0.0000867 |
| C2orf68  | chromosome 2 open reading frame 68                           | 1.66 | down | 0.003029 | 0.0005632 |
| C2orf69  | chromosome 2 open reading frame 69                           | 1.54 | down | 0.001543 | 0.0002180 |
| C3AR1    | complement component 3a receptor 1                           | 1.68 | down | 0.001317 | 0.0001723 |
| C6orf62  | chromosome 6 open reading frame 62                           | 1.55 | down | 0.001342 | 0.0001769 |
| C7orf50  | chromosome 7 open reading frame 50                           | 1.95 | down | 0.002620 | 0.0004590 |
| C8orf37  | chromosome 8 open reading frame 37                           | 1.73 | down | 0.002421 | 0.0004081 |
| C9orf171 | chromosome 9 open reading frame 171                          | 2.11 | down | 0.000377 | 0.0000236 |
| CACNA1B  | calcium channel, voltage-dependent, N type, alpha 1B subunit | 2.25 | down | 0.001590 | 0.0002264 |
| CACNA2D2 | calcium channel, voltage-dependent, alpha 2/delta subunit 2  | 1.99 | down | 0.000253 | 0.0000118 |

|         |                                                                       |      |      |          |           |
|---------|-----------------------------------------------------------------------|------|------|----------|-----------|
| CACYBP  | calcyclin binding protein                                             | 1.72 | down | 0.000662 | 0.0000602 |
| CALML4  | calmodulin-like 4                                                     | 2.20 | down | 0.000022 | 0.0000001 |
| CAMKK1  | calcium/calmodulin-dependent protein kinase kinase 1, alpha           | 1.86 | down | 0.004053 | 0.0008497 |
| CAMKK2  | calcium/calmodulin-dependent protein kinase kinase 2, beta            | 1.81 | down | 0.004461 | 0.0009764 |
| CASC5   | cancer susceptibility candidate 5                                     | 1.77 | down | 0.000194 | 0.0000073 |
| CBFA2T3 | core-binding factor, runt domain, alpha subunit 2; translocated to, 3 | 1.71 | down | 0.000332 | 0.0000194 |
| CBX6    | chromobox homolog 6                                                   | 1.71 | down | 0.000941 | 0.0001043 |
| CC2D2A  | coiled-coil and C2 domain containing 2A                               | 2.25 | down | 0.000786 | 0.0000786 |
| CCDC106 | coiled-coil domain containing 106                                     | 1.64 | down | 0.000548 | 0.0000451 |
| CCDC121 | coiled-coil domain containing 121                                     | 2.02 | down | 0.000335 | 0.0000197 |
| CCDC146 | coiled-coil domain containing 146                                     | 1.55 | down | 0.003652 | 0.0007318 |
| CCDC167 | coiled-coil domain containing 167                                     | 1.59 | down | 0.000345 | 0.0000207 |
| CCDC18  | coiled-coil domain containing 18                                      | 2.52 | down | 0.001020 | 0.0001174 |
| CCDC88C | coiled-coil domain containing 88C                                     | 1.55 | down | 0.002499 | 0.0004279 |
| CCNB1   | cyclin B1                                                             | 2.21 | down | 0.000022 | 0.0000001 |
| CCNB2   | cyclin B2                                                             | 1.72 | down | 0.001801 | 0.0002723 |
| CCNL2   | cyclin L2                                                             | 2.29 | down | 0.000141 | 0.0000042 |
| CD3EAP  | CD3e molecule, epsilon associated protein                             | 1.53 | down | 0.000057 | 0.0000007 |
| CDC20   | cell division cycle 20                                                | 2.46 | down | 0.000197 | 0.0000075 |
| CDCA7   | cell division cycle associated 7                                      | 1.90 | down | 0.000227 | 0.0000098 |
| CDCA8   | cell division cycle associated 8                                      | 1.52 | down | 0.002155 | 0.0003487 |
| CDKN3   | cyclin-dependent kinase inhibitor 3                                   | 2.25 | down | 0.000006 | 0.0000000 |
| CDPF1   | cysteine-rich, DPF motif domain containing 1                          | 1.90 | down | 0.000045 | 0.0000004 |
| CDV3    | CDV3 homolog (mouse)                                                  | 1.51 | down | 0.002355 | 0.0003933 |
| CENPA   | centromere protein A                                                  | 1.66 | down | 0.000032 | 0.0000002 |
| CENPE   | centromere protein E, 312kDa                                          | 1.88 | down | 0.000022 | 0.0000001 |
| CENPF   | centromere protein F, 350/400kDa                                      | 1.98 | down | 0.002923 | 0.0005337 |
| CEP70   | centrosomal protein 70kDa                                             | 1.65 | down | 0.000352 | 0.0000213 |
| CEP83   | centrosomal protein 83kDa                                             | 1.60 | down | 0.002516 | 0.0004317 |

|         |                                                              |      |      |          |           |
|---------|--------------------------------------------------------------|------|------|----------|-----------|
| CHDH    | choline dehydrogenase                                        | 1.95 | down | 0.000515 | 0.0000410 |
| CHRNA5  | cholinergic receptor, nicotinic, alpha 5 (neuronal)          | 1.51 | down | 0.001696 | 0.0002492 |
| CIRBP   | cold inducible RNA binding protein                           | 1.56 | down | 0.000091 | 0.0000018 |
| CKAP5   | cytoskeleton associated protein 5                            | 1.51 | down | 0.000639 | 0.0000572 |
| CLASP2  | cytoplasmic linker associated protein 2                      | 1.56 | down | 0.001267 | 0.0001626 |
| CLCN2   | chloride channel, voltage-sensitive 2                        | 1.54 | down | 0.000958 | 0.0001073 |
| CLUAP1  | clusterin associated protein 1                               | 1.75 | down | 0.000306 | 0.0000168 |
| CLYBL   | citrate lyase beta like                                      | 1.99 | down | 0.000372 | 0.0000233 |
| CNTRL   | centriolin                                                   | 2.49 | down | 0.000152 | 0.0000048 |
| COA5    | cytochrome c oxidase assembly factor 5                       | 1.88 | down | 0.000732 | 0.0000699 |
| COQ2    | coenzyme Q2 4-hydroxybenzoate polyprenyltransferase          | 1.66 | down | 0.001805 | 0.0002736 |
| COQ3    | coenzyme Q3 methyltransferase                                | 1.96 | down | 0.001478 | 0.0002041 |
| CPOX    | coproporphyrinogen oxidase                                   | 1.64 | down | 0.001790 | 0.0002704 |
| CREB3L4 | cAMP responsive element binding protein 3-like 4             | 1.84 | down | 0.000938 | 0.0001036 |
| CRTC1   | CREB regulated transcription coactivator 1                   | 2.36 | down | 0.000305 | 0.0000168 |
| CRYL1   | crystallin, lambda 1                                         | 1.96 | down | 0.000274 | 0.0000137 |
| CRYZ    | crystallin, zeta (quinone reductase)                         | 1.68 | down | 0.000543 | 0.0000444 |
| CSE1L   | CSE1 chromosome segregation 1-like (yeast)                   | 1.54 | down | 0.000573 | 0.0000484 |
| CSNK2A2 | casein kinase 2, alpha prime polypeptide                     | 1.60 | down | 0.000210 | 0.0000085 |
| CTAGE5  | CTAGE family, member 5                                       | 1.54 | down | 0.002532 | 0.0004366 |
| CTPS2   | CTP synthase 2                                               | 1.59 | down | 0.000481 | 0.0000359 |
| CUTC    | cutC copper transporter                                      | 2.05 | down | 0.000275 | 0.0000138 |
| CYB5B   | cytochrome b5 type B (outer mitochondrial membrane)          | 2.09 | down | 0.000350 | 0.0000211 |
| CYB5RL  | cytochrome b5 reductase-like                                 | 2.30 | down | 0.000351 | 0.0000212 |
| DAK     | dihydroxyacetone kinase 2 homolog ( <i>S. cerevisiae</i> )   | 1.83 | down | 0.000174 | 0.0000061 |
| DCBLD2  | discoidin, CUB and LCCL domain containing 2                  | 1.57 | down | 0.001195 | 0.0001482 |
| DCUN1D4 | DCN1, defective in cullin neddylation 1, domain containing 4 | 1.93 | down | 0.000502 | 0.0000389 |
| DDN     | dendrin                                                      | 1.86 | down | 0.000833 | 0.0000849 |
| DDX46   | DEAD (Asp-Glu-Ala-Asp) box polypeptide 46                    | 1.57 | down | 0.001235 | 0.0001561 |
| DENND4C | DENN/MADD domain containing 4C                               | 1.69 | down | 0.001242 | 0.0001577 |

|           |                                                                         |      |      |          |           |
|-----------|-------------------------------------------------------------------------|------|------|----------|-----------|
| DENND5B   | DENN/MADD domain containing 5B                                          | 2.22 | down | 0.002279 | 0.0003752 |
| DEPDC1    | DEP domain containing 1                                                 | 2.54 | down | 0.000054 | 0.0000006 |
| DEPDC1B   | DEP domain containing 1B                                                | 1.87 | down | 0.000336 | 0.0000198 |
| DET1      | de-etiolated homolog 1 (Arabidopsis)                                    | 1.53 | down | 0.001396 | 0.0001878 |
| DHRS2     | dehydrogenase/reductase (SDR family) member 2                           | 2.94 | down | 0.000022 | 0.0000001 |
| DHRS3     | dehydrogenase/reductase (SDR family) member 3                           | 1.61 | down | 0.000253 | 0.0000119 |
| DHRS4-AS1 | DHRS4 antisense RNA 1                                                   | 1.74 | down | 0.003533 | 0.0007007 |
| DHX32     | DEAH (Asp-Glu-Ala-His) box polypeptide 32                               | 1.63 | down | 0.000222 | 0.0000094 |
| DIDO1     | death inducer-obliterator 1                                             | 1.55 | down | 0.001501 | 0.0002093 |
| DIEXF     | digestive organ expansion factor homolog (zebrafish)                    | 1.57 | down | 0.001026 | 0.0001189 |
| DIMT1     | DIM1 dimethyladenosine transferase 1 homolog ( <i>S. cerevisiae</i> )   | 2.59 | down | 0.000305 | 0.0000168 |
| DIS3L     | DIS3 like exosome 3'-5' exoribonuclease                                 | 1.76 | down | 0.000353 | 0.0000214 |
| DLEU2L    | deleted in lymphocytic leukemia 2-like                                  | 1.98 | down | 0.000933 | 0.0001026 |
| DLG1      | discs, large homolog 1 ( <i>Drosophila</i> )                            | 1.63 | down | 0.002278 | 0.0003749 |
| DLG5-AS1  | DLG5 antisense RNA 1                                                    | 1.81 | down | 0.002707 | 0.0004805 |
| DLGAP5    | discs, large ( <i>Drosophila</i> ) homolog-associated protein 5         | 1.95 | down | 0.000589 | 0.0000504 |
| DNM1L     | dynamamin 1-like                                                        | 1.51 | down | 0.002788 | 0.0005025 |
| DNMT3B    | DNA (cytosine-5-)-methyltransferase 3 beta                              | 1.64 | down | 0.000380 | 0.0000239 |
| DOCK1     | dedicator of cytokinesis 1                                              | 1.54 | down | 0.000062 | 0.0000009 |
| DOK3      | docking protein 3                                                       | 1.87 | down | 0.000851 | 0.0000886 |
| DPM1      | dolichyl-phosphate mannosyltransferase polypeptide 1, catalytic subunit | 1.54 | down | 0.001166 | 0.0001432 |
| DPP8      | dipeptidyl-peptidase 8                                                  | 1.60 | down | 0.000074 | 0.0000012 |
| DRD4      | dopamine receptor D4                                                    | 5.42 | down | 0.001704 | 0.0002513 |
| DTD1      | D-tyrosyl-tRNA deacylase 1                                              | 1.64 | down | 0.000495 | 0.0000380 |
| DYRK2     | dual-specificity tyrosine-(Y)-phosphorylation regulated kinase 2        | 1.85 | down | 0.000254 | 0.0000121 |
| EBPL      | emopamil binding protein-like                                           | 2.31 | down | 0.000505 | 0.0000393 |
| EEF2K     | eukaryotic elongation factor-2 kinase                                   | 2.91 | down | 0.000037 | 0.0000002 |
| EFCC1     | EF-hand and coiled-coil domain containing 1                             | 1.79 | down | 0.002990 | 0.0005528 |

|              |                                                                       |      |      |          |           |
|--------------|-----------------------------------------------------------------------|------|------|----------|-----------|
| EHBP1        | EH domain binding protein 1                                           | 1.62 | down | 0.001253 | 0.0001596 |
| EHMT1        | euchromatic histone-lysine N-methyltransferase 1                      | 1.86 | down | 0.003252 | 0.0006233 |
| EIF2B5       | eukaryotic translation initiation factor 2B, subunit 5 epsilon, 82kDa | 1.74 | down | 0.000121 | 0.0000032 |
| EIF4B        | eukaryotic translation initiation factor 4B                           | 1.77 | down | 0.001330 | 0.0001745 |
| EIF4E        | eukaryotic translation initiation factor 4E                           | 1.82 | down | 0.003446 | 0.0006755 |
| EIF4E2       | eukaryotic translation initiation factor 4E family member 2           | 1.75 | down | 0.000458 | 0.0000330 |
| EIF5         | eukaryotic translation initiation factor 5                            | 1.85 | down | 0.000621 | 0.0000545 |
| EMC2         | ER membrane protein complex subunit 2                                 | 1.50 | down | 0.000400 | 0.0000261 |
| EML4         | echinoderm microtubule associated protein like 4                      | 1.59 | down | 0.000250 | 0.0000114 |
| ENDOV        | endonuclease V                                                        | 1.52 | down | 0.000613 | 0.0000533 |
| ENKD1        | enkurin domain containing 1                                           | 2.20 | down | 0.000103 | 0.0000023 |
| ENOX2        | ecto-NOX disulfide-thiol exchanger 2                                  | 1.60 | down | 0.000501 | 0.0000389 |
| EP400        | E1A binding protein p400                                              | 1.77 | down | 0.003957 | 0.0008199 |
| EPB41L4A-AS1 | EPB41L4A antisense RNA 1                                              | 1.96 | down | 0.000094 | 0.0000019 |
| EPHX2        | epoxide hydrolase 2, cytoplasmic                                      | 1.69 | down | 0.000060 | 0.0000008 |
| EPS15        | epidermal growth factor receptor pathway substrate 15                 | 1.75 | down | 0.002023 | 0.0003204 |
| ERMARD       | ER membrane-associated RNA degradation                                | 1.71 | down | 0.000383 | 0.0000243 |
| ETF1         | eukaryotic translation termination factor 1                           | 1.61 | down | 0.000577 | 0.0000490 |
| EVI5         | ecotropic viral integration site 5                                    | 1.68 | down | 0.004535 | 0.0009982 |
| EWSR1        | EWS RNA-binding protein 1                                             | 1.86 | down | 0.001676 | 0.0002453 |
| EXD3         | exonuclease 3'-5' domain containing 3                                 | 3.82 | down | 0.000075 | 0.0000013 |
| EXOC6        | exocyst complex component 6                                           | 1.59 | down | 0.001533 | 0.0002162 |
| FAM13B       | family with sequence similarity 13, member B                          | 1.62 | down | 0.001349 | 0.0001784 |
| FAM149B1     | family with sequence similarity 149, member B1                        | 2.61 | down | 0.000322 | 0.0000184 |
| FAM175A      | family with sequence similarity 175, member A                         | 2.79 | down | 0.000036 | 0.0000002 |
| FAM203A      | family with sequence similarity 203, member A                         | 2.32 | down | 0.000205 | 0.0000081 |
| FAM216A      | family with sequence similarity 216, member A                         | 1.75 | down | 0.000936 | 0.0001031 |
| FAM72A       | family with sequence similarity 72, member A                          | 2.08 | down | 0.000043 | 0.0000004 |
| FAM72D       | family with sequence similarity 72, member D                          | 2.18 | down | 0.000103 | 0.0000023 |

|         |                                                                       |      |      |          |           |
|---------|-----------------------------------------------------------------------|------|------|----------|-----------|
| FAM86FP | family with sequence similarity 86, member A pseudogene               | 2.00 | down | 0.000078 | 0.0000013 |
| FASTKD2 | FAST kinase domains 2                                                 | 1.77 | down | 0.002106 | 0.0003382 |
| FBRSL1  | fibrosin-like 1                                                       | 1.54 | down | 0.000415 | 0.0000275 |
| FBXO18  | F-box protein, helicase, 18                                           | 1.51 | down | 0.003884 | 0.0007946 |
| FBXO24  | F-box protein 24                                                      | 1.97 | down | 0.004725 | 0.0010580 |
| FBXO4   | F-box protein 4                                                       | 1.80 | down | 0.004152 | 0.0008787 |
| FBXO9   | F-box protein 9                                                       | 1.64 | down | 0.000360 | 0.0000219 |
| FGF9    | fibroblast growth factor 9                                            | 4.09 | down | 0.000456 | 0.0000327 |
| FGGY    | FGGY carbohydrate kinase domain containing                            | 1.64 | down | 0.004071 | 0.0008545 |
| FHAD1   | forkhead-associated (FHA) phosphopeptide binding domain 1             | 1.93 | down | 0.002470 | 0.0004203 |
| FJX1    | four jointed box 1 (Drosophila)                                       | 1.75 | down | 0.000864 | 0.0000906 |
| FKBP5   | FK506 binding protein 5                                               | 1.63 | down | 0.004075 | 0.0008554 |
| FLYWCH1 | FLYWCH-type zinc finger 1                                             | 1.80 | down | 0.001059 | 0.0001246 |
| FNBP4   | formin binding protein 4                                              | 1.62 | down | 0.000990 | 0.0001127 |
| FOXK2   | forkhead box K2                                                       | 1.57 | down | 0.000329 | 0.0000190 |
| FRMD5   | FERM domain containing 5                                              | 1.75 | down | 0.002895 | 0.0005277 |
| FUBP3   | far upstream element (FUSE) binding protein 3                         | 1.51 | down | 0.000923 | 0.0001008 |
| FUOM    | fucose mutarotase                                                     | 1.62 | down | 0.001594 | 0.0002280 |
| FXR1    | fragile X mental retardation, autosomal homolog 1                     | 1.97 | down | 0.000831 | 0.0000847 |
| G2E3    | G2/M-phase specific E3 ubiquitin protein ligase                       | 1.82 | down | 0.000390 | 0.0000251 |
| G3BP1   | GTPase activating protein (SH3 domain) binding protein 1              | 1.62 | down | 0.000167 | 0.0000056 |
| GAS2L3  | growth arrest-specific 2 like 3                                       | 2.00 | down | 0.000344 | 0.0000206 |
| GATAD2A | GATA zinc finger domain containing 2A                                 | 1.58 | down | 0.000447 | 0.0000313 |
| GBAS    | glioblastoma amplified sequence                                       | 1.60 | down | 0.001020 | 0.0001176 |
| GCLC    | glutamate-cysteine ligase, catalytic subunit                          | 1.81 | down | 0.000477 | 0.0000351 |
| GCOM1   | GRINL1A complex locus 1                                               | 1.51 | down | 0.000709 | 0.0000664 |
| GDI2    | GDP dissociation inhibitor 2                                          | 1.50 | down | 0.002521 | 0.0004339 |
| GEN1    | GEN1 Holliday junction 5' flap endonuclease                           | 1.92 | down | 0.001167 | 0.0001436 |
| GGA2    | golgi-associated, gamma adaptin ear containing, ARF binding protein 2 | 1.75 | down | 0.000159 | 0.0000051 |



|          |                                                                            |      |      |          |           |
|----------|----------------------------------------------------------------------------|------|------|----------|-----------|
| GHRLOS   | ghrelin opposite strand/antisense RNA                                      | 2.78 | down | 0.000321 | 0.0000182 |
| GLT8D1   | glycosyltransferase 8 domain containing 1                                  | 1.56 | down | 0.002992 | 0.0005532 |
| GLTSCR2  | glioma tumor suppressor candidate region gene 2                            | 1.89 | down | 0.000409 | 0.0000269 |
| GNAZ     | guanine nucleotide binding protein (G protein), alpha z polypeptide        | 2.32 | down | 0.000037 | 0.0000002 |
| GNB1L    | guanine nucleotide binding protein (G protein), beta polypeptide 1-like    | 2.05 | down | 0.000242 | 0.0000108 |
| GNL3     | guanine nucleotide binding protein-like 3 (nucleolar)                      | 1.68 | down | 0.002959 | 0.0005434 |
| GNL3L    | guanine nucleotide binding protein-like 3 (nucleolar)-like                 | 1.55 | down | 0.000244 | 0.0000110 |
| GOLGA3   | golgin A3                                                                  | 1.51 | down | 0.001648 | 0.0002386 |
| GP9      | glycoprotein IX (platelet)                                                 | 1.64 | down | 0.001904 | 0.0002955 |
| GPR180   | G protein-coupled receptor 180                                             | 1.58 | down | 0.002040 | 0.0003233 |
| GRID1    | glutamate receptor, ionotropic, delta 1                                    | 1.87 | down | 0.000674 | 0.0000620 |
| GRK6     | G protein-coupled receptor kinase 6                                        | 1.53 | down | 0.003665 | 0.0007356 |
| GSTZ1    | glutathione S-transferase zeta 1                                           | 1.94 | down | 0.000528 | 0.0000423 |
| GYLTL1B  | glycosyltransferase-like 1B                                                | 1.53 | down | 0.002123 | 0.0003421 |
| H1FX     | H1 histone family, member X                                                | 1.74 | down | 0.000733 | 0.0000701 |
| H2AFX    | H2A histone family, member X                                               | 2.07 | down | 0.000152 | 0.0000048 |
| HABP4    | hyaluronan binding protein 4                                               | 1.74 | down | 0.000652 | 0.0000590 |
| HACE1    | HECT domain and ankyrin repeat containing E3 ubiquitin protein ligase 1    | 1.57 | down | 0.001823 | 0.0002785 |
| HAUS6    | HAUS augmin-like complex, subunit 6                                        | 2.76 | down | 0.002690 | 0.0004760 |
| HDAC4    | histone deacetylase 4                                                      | 3.64 | down | 0.000057 | 0.0000007 |
| HEATR3   | HEAT repeat containing 3                                                   | 1.76 | down | 0.000532 | 0.0000429 |
| HEXDC    | hexosaminidase (glycosyl hydrolase family 20, catalytic domain) containing | 1.52 | down | 0.002232 | 0.0003653 |
| HIATL1   | hippocampus abundant transcript-like 1                                     | 1.50 | down | 0.002894 | 0.0005275 |
| HIBCH    | 3-hydroxyisobutyryl-CoA hydrolase                                          | 1.58 | down | 0.004204 | 0.0008980 |
| HIRA     | histone cell cycle regulator                                               | 1.97 | down | 0.000015 | 0.0000000 |
| HIST1H1C | histone cluster 1, H1c                                                     | 2.29 | down | 0.000177 | 0.0000062 |
| HIST1H1D | histone cluster 1, H1d                                                     | 3.42 | down | 0.000091 | 0.0000018 |

|           |                         |      |      |          |           |
|-----------|-------------------------|------|------|----------|-----------|
| HIST1H1E  | histone cluster 1, H1e  | 3.36 | down | 0.000010 | 0.0000000 |
| HIST1H2AB | histone cluster 1, H2ab | 4.16 | down | 0.000087 | 0.0000016 |
| HIST1H2AC | histone cluster 1, H2ac | 4.16 | down | 0.000083 | 0.0000015 |
| HIST1H2AD | histone cluster 1, H2ad | 2.59 | down | 0.000014 | 0.0000000 |
| HIST1H2AE | histone cluster 1, H2ae | 2.68 | down | 0.000043 | 0.0000004 |
| HIST1H2AH | histone cluster 1, H2ah | 3.47 | down | 0.000006 | 0.0000000 |
| HIST1H2AI | histone cluster 1, H2ai | 3.64 | down | 0.000044 | 0.0000004 |
| HIST1H2AJ | histone cluster 1, H2aj | 3.07 | down | 0.000014 | 0.0000000 |
| HIST1H2AK | histone cluster 1, H2ak | 3.39 | down | 0.000014 | 0.0000000 |
| HIST1H2AM | histone cluster 1, H2am | 4.29 | down | 0.000033 | 0.0000002 |
| HIST1H2BB | histone cluster 1, H2bb | 2.23 | down | 0.000205 | 0.0000081 |
| HIST1H2BC | histone cluster 1, H2bc | 2.46 | down | 0.000040 | 0.0000003 |
| HIST1H2BD | histone cluster 1, H2bd | 1.65 | down | 0.000591 | 0.0000507 |
| HIST1H2BF | histone cluster 1, H2bf | 7.85 | down | 0.000459 | 0.0000331 |
| HIST1H2BG | histone cluster 1, H2bg | 2.45 | down | 0.000127 | 0.0000035 |
| HIST1H2BH | histone cluster 1, H2bh | 1.83 | down | 0.000158 | 0.0000050 |
| HIST1H2BI | histone cluster 1, H2bi | 1.52 | down | 0.000102 | 0.0000021 |
| HIST1H2BJ | histone cluster 1, H2bj | 3.02 | down | 0.000022 | 0.0000001 |
| HIST1H2BK | histone cluster 1, H2bk | 1.89 | down | 0.000228 | 0.0000099 |
| HIST1H2BL | histone cluster 1, H2bl | 1.80 | down | 0.000967 | 0.0001089 |
| HIST1H2BO | histone cluster 1, H2bo | 1.90 | down | 0.000079 | 0.0000014 |
| HIST1H3B  | histone cluster 1, H3b  | 2.77 | down | 0.000017 | 0.0000000 |
| HIST1H3D  | histone cluster 1, H3d  | 3.48 | down | 0.000015 | 0.0000000 |
| HIST1H3E  | histone cluster 1, H3e  | 1.63 | down | 0.001210 | 0.0001517 |
| HIST1H3F  | histone cluster 1, H3f  | 3.86 | down | 0.000031 | 0.0000002 |
| HIST1H3H  | histone cluster 1, H3h  | 3.95 | down | 0.000014 | 0.0000000 |
| HIST1H3J  | histone cluster 1, H3j  | 3.14 | down | 0.000177 | 0.0000062 |
| HIST1H4A  | histone cluster 1, H4a  | 3.03 | down | 0.000042 | 0.0000004 |
| HIST1H4B  | histone cluster 1, H4b  | 2.14 | down | 0.000078 | 0.0000013 |
| HIST1H4C  | histone cluster 1, H4c  | 2.02 | down | 0.000600 | 0.0000518 |

|           |                                                                                          |      |      |          |           |
|-----------|------------------------------------------------------------------------------------------|------|------|----------|-----------|
| HIST1H4D  | histone cluster 1, H4d                                                                   | 2.81 | down | 0.000106 | 0.0000024 |
| HIST1H4E  | histone cluster 1, H4e                                                                   | 3.04 | down | 0.000097 | 0.0000019 |
| HIST1H4F  | histone cluster 1, H4f                                                                   | 2.40 | down | 0.000246 | 0.0000112 |
| HIST1H4H  | histone cluster 1, H4h                                                                   | 2.93 | down | 0.000243 | 0.0000109 |
| HIST1H4I  | histone cluster 1, H4i                                                                   | 2.74 | down | 0.000075 | 0.0000013 |
| HIST1H4J  | histone cluster 1, H4j                                                                   | 2.35 | down | 0.000053 | 0.0000006 |
| HIST1H4K  | histone cluster 1, H4k                                                                   | 2.56 | down | 0.000043 | 0.0000004 |
| HIST1H4L  | histone cluster 1, H4l                                                                   | 2.99 | down | 0.000582 | 0.0000496 |
| HIST2H2AB | histone cluster 2, H2ab                                                                  | 2.30 | down | 0.000028 | 0.0000001 |
| HIST2H2AC | histone cluster 2, H2ac                                                                  | 3.05 | down | 0.000179 | 0.0000063 |
| HIST2H2BE | histone cluster 2, H2be                                                                  | 2.50 | down | 0.002202 | 0.0003586 |
| HIST2H2BF | histone cluster 2, H2bf                                                                  | 2.22 | down | 0.000102 | 0.0000021 |
| HIST2H3A  | histone cluster 2, H3a                                                                   | 3.55 | down | 0.000022 | 0.0000001 |
| HIST2H4B  | histone cluster 2, H4b                                                                   | 2.42 | down | 0.000820 | 0.0000833 |
| HIST3H2BB | histone cluster 3, H2bb                                                                  | 3.02 | down | 0.000732 | 0.0000699 |
| HMGB3     | high mobility group box 3                                                                | 1.74 | down | 0.003251 | 0.0006218 |
| HMGCR     | 3-hydroxy-3-methylglutaryl-CoA reductase                                                 | 1.77 | down | 0.000234 | 0.0000103 |
| HMMR      | hyaluronan-mediated motility receptor (RHAMM)                                            | 2.63 | down | 0.000046 | 0.0000005 |
| HNRNPA1   | heterogeneous nuclear ribonucleoprotein A1                                               | 2.06 | down | 0.000117 | 0.0000030 |
| HNRNPA1L2 | heterogeneous nuclear ribonucleoprotein A1-like 2                                        | 2.30 | down | 0.000064 | 0.0000010 |
| HNRNPA2B1 | heterogeneous nuclear ribonucleoprotein A2/B1                                            | 1.53 | down | 0.001623 | 0.0002336 |
| HNRNPC    | heterogeneous nuclear ribonucleoprotein C (C1/C2)                                        | 1.80 | down | 0.000148 | 0.0000045 |
| HNRNPD    | heterogeneous nuclear ribonucleoprotein D (AU-rich element RNA binding protein 1, 37kDa) | 1.60 | down | 0.000593 | 0.0000510 |
| HNRNPH3   | heterogeneous nuclear ribonucleoprotein H3 (2H9)                                         | 1.92 | down | 0.000027 | 0.0000001 |
| HNRNPK    | heterogeneous nuclear ribonucleoprotein K                                                | 1.54 | down | 0.002838 | 0.0005144 |
| HNRNPLL   | heterogeneous nuclear ribonucleoprotein L-like                                           | 1.84 | down | 0.000116 | 0.0000029 |
| HNRNPU    | heterogeneous nuclear ribonucleoprotein U (scaffold attachment factor A)                 | 1.91 | down | 0.000287 | 0.0000150 |
| HOXC4     | homeobox C4                                                                              | 3.00 | down | 0.000452 | 0.0000320 |

|          |                                                                |      |      |          |           |
|----------|----------------------------------------------------------------|------|------|----------|-----------|
| HP1BP3   | heterochromatin protein 1, binding protein 3                   | 1.70 | down | 0.000490 | 0.0000373 |
| HSD17B8  | hydroxysteroid (17-beta) dehydrogenase 8                       | 2.10 | down | 0.000211 | 0.0000086 |
| HSPA4    | heat shock 70kDa protein 4                                     | 1.65 | down | 0.000437 | 0.0000301 |
| HSPA8    | heat shock 70kDa protein 8                                     | 1.91 | down | 0.000250 | 0.0000115 |
| HSPE1    | heat shock 10kDa protein 1                                     | 1.52 | down | 0.000398 | 0.0000257 |
| HSPH1    | heat shock 105kDa/110kDa protein 1                             | 1.99 | down | 0.000278 | 0.0000141 |
| HTATIP2  | HIV-1 Tat interactive protein 2, 30kDa                         | 1.81 | down | 0.003166 | 0.0005996 |
| HYLS1    | hydrolethalus syndrome 1                                       | 1.64 | down | 0.001977 | 0.0003110 |
| IAPP     | islet amyloid polypeptide                                      | 1.76 | down | 0.000068 | 0.0000010 |
| ICAM5    | intercellular adhesion molecule 5, telencephalin               | 1.55 | down | 0.000623 | 0.0000548 |
| IDE      | insulin-degrading enzyme                                       | 1.51 | down | 0.000743 | 0.0000721 |
| IER5L    | immediate early response 5-like                                | 3.20 | down | 0.000060 | 0.0000008 |
| IFT140   | intraflagellar transport 140 homolog (Chlamydomonas)           | 2.40 | down | 0.003325 | 0.0006458 |
| IFT74    | intraflagellar transport 74 homolog (Chlamydomonas)            | 1.67 | down | 0.003474 | 0.0006825 |
| IFT81    | intraflagellar transport 81 homolog (Chlamydomonas)            | 1.62 | down | 0.000364 | 0.0000226 |
| IL17B    | interleukin 17B                                                | 1.55 | down | 0.002939 | 0.0005380 |
| IL1R1    | interleukin 1 receptor, type I                                 | 2.01 | down | 0.001708 | 0.0002523 |
| ILF3-AS1 | ILF3 antisense RNA 1 (head to head)                            | 1.73 | down | 0.000227 | 0.0000097 |
| ILKAP    | integrin-linked kinase-associated serine/threonine phosphatase | 1.56 | down | 0.001676 | 0.0002454 |
| IMPA2    | inositol(myo)-1(or 4)-monophosphatase 2                        | 1.92 | down | 0.003082 | 0.0005768 |
| IMPACT   | impact RWD domain protein                                      | 1.76 | down | 0.001296 | 0.0001682 |
| ING3     | inhibitor of growth family, member 3                           | 2.52 | down | 0.001226 | 0.0001545 |
| INO80    | INO80 complex subunit                                          | 1.57 | down | 0.001052 | 0.0001232 |
| INPP5A   | inositol polyphosphate-5-phosphatase, 40kDa                    | 2.13 | down | 0.000159 | 0.0000050 |
| INSIG1   | insulin induced gene 1                                         | 1.83 | down | 0.000842 | 0.0000863 |
| IPO11    | importin 11                                                    | 1.64 | down | 0.000586 | 0.0000501 |
| IPO4     | importin 4                                                     | 1.51 | down | 0.000983 | 0.0001116 |
| IQCE     | IQ motif containing E                                          | 1.68 | down | 0.001919 | 0.0002986 |
| ISOC2    | isochorismatase domain containing 2                            | 1.51 | down | 0.002988 | 0.0005519 |
| ITCH     | itchy E3 ubiquitin protein ligase                              | 1.75 | down | 0.001436 | 0.0001966 |

|          |                                                               |      |      |          |           |
|----------|---------------------------------------------------------------|------|------|----------|-----------|
| KAT5     | K(lysine) acetyltransferase 5                                 | 1.54 | down | 0.000087 | 0.0000016 |
| KAZALD1  | Kazal-type serine peptidase inhibitor domain 1                | 2.33 | down | 0.000266 | 0.0000131 |
| KCNJ14   | potassium inwardly-rectifying channel, subfamily J, member 14 | 2.03 | down | 0.000487 | 0.0000367 |
| KCNQ1    | potassium voltage-gated channel, KQT-like subfamily, member 1 | 4.41 | down | 0.000147 | 0.0000045 |
| KCNRG    | potassium channel regulator                                   | 2.21 | down | 0.001719 | 0.0002545 |
| KCTD15   | potassium channel tetramerization domain containing 15        | 1.95 | down | 0.000359 | 0.0000218 |
| KIAA0020 | KIAA0020                                                      | 1.69 | down | 0.000294 | 0.0000157 |
| KIAA0368 | KIAA0368                                                      | 1.56 | down | 0.001362 | 0.0001806 |
| KIAA1024 | KIAA1024                                                      | 1.55 | down | 0.001952 | 0.0003061 |
| KIAA1033 | KIAA1033                                                      | 1.76 | down | 0.000074 | 0.0000012 |
| KIF14    | kinesin family member 14                                      | 1.94 | down | 0.000021 | 0.0000001 |
| KIF15    | kinesin family member 15                                      | 1.57 | down | 0.003565 | 0.0007095 |
| KIF18A   | kinesin family member 18A                                     | 1.87 | down | 0.000324 | 0.0000185 |
| KIF20A   | kinesin family member 20A                                     | 1.90 | down | 0.000061 | 0.0000009 |
| KIF20B   | kinesin family member 20B                                     | 1.89 | down | 0.000428 | 0.0000289 |
| KLF10    | Kruppel-like factor 10                                        | 1.53 | down | 0.002861 | 0.0005205 |
| KLHL29   | kelch-like family member 29                                   | 1.56 | down | 0.000147 | 0.0000045 |
| KNSTRN   | kinetochore-localized astrin/SPAG5 binding protein            | 2.13 | down | 0.000069 | 0.0000011 |
| KNTC1    | kinetochore associated 1                                      | 1.62 | down | 0.000298 | 0.0000161 |
| KTN1-AS1 | KTN1 antisense RNA 1                                          | 2.42 | down | 0.000170 | 0.0000058 |
| L3MBTL3  | l(3)mbt-like 3 (Drosophila)                                   | 2.34 | down | 0.001006 | 0.0001155 |
| LARP1B   | La ribonucleoprotein domain family, member 1B                 | 1.74 | down | 0.002217 | 0.0003617 |
| LARP4    | La ribonucleoprotein domain family, member 4                  | 1.57 | down | 0.000691 | 0.0000641 |
| LARS     | leucyl-tRNA synthetase                                        | 2.02 | down | 0.000120 | 0.0000032 |
| LBR      | lamin B receptor                                              | 1.63 | down | 0.002538 | 0.0004381 |
| LEAP2    | liver expressed antimicrobial peptide 2                       | 3.05 | down | 0.000868 | 0.0000915 |
| LENG9    | leukocyte receptor cluster (LRC) member 9                     | 2.52 | down | 0.000250 | 0.0000115 |
| LFNG     | LFNG O-fucosylpeptide 3-beta-N-acetylglucosaminyltransferase  | 2.39 | down | 0.000276 | 0.0000139 |

|              |                                                                               |      |      |          |           |
|--------------|-------------------------------------------------------------------------------|------|------|----------|-----------|
| LHPP         | phospholysine phosphohistidine inorganic pyrophosphate phosphatase            | 2.06 | down | 0.000157 | 0.0000049 |
| LIAS         | lipoic acid synthetase                                                        | 1.62 | down | 0.001142 | 0.0001392 |
| LIG3         | ligase III, DNA, ATP-dependent                                                | 1.69 | down | 0.003530 | 0.0006990 |
| LINC00115    | long intergenic non-protein coding RNA 115                                    | 2.58 | down | 0.003882 | 0.0007940 |
| LINC00263    | long intergenic non-protein coding RNA 263                                    | 1.96 | down | 0.001298 | 0.0001690 |
| LINC00482    | long intergenic non-protein coding RNA 482                                    | 1.58 | down | 0.000318 | 0.0000179 |
| LINC01003    | long intergenic non-protein coding RNA 1003                                   | 2.70 | down | 0.001698 | 0.0002496 |
| LINC01004    | long intergenic non-protein coding RNA 1004                                   | 1.83 | down | 0.002931 | 0.0005358 |
| LINC01089    | long intergenic non-protein coding RNA 1089                                   | 1.89 | down | 0.001704 | 0.0002512 |
| LINC01315    | long intergenic non-protein coding RNA 1315                                   | 1.53 | down | 0.000353 | 0.0000214 |
| LIPT2        | lipoyl(octanoyl) transferase 2 (putative)                                     | 1.85 | down | 0.001056 | 0.0001240 |
| LMNB1        | lamin B1                                                                      | 1.58 | down | 0.000023 | 0.0000001 |
| LNPI         | leukemia NUP98 fusion partner 1                                               | 2.90 | down | 0.001657 | 0.0002406 |
| LOC100233156 | tektin 4 pseudogene                                                           | 2.86 | down | 0.000289 | 0.0000152 |
| LOC93622     | Morf4 family associated protein 1-like 1 pseudogene                           | 1.65 | down | 0.000291 | 0.0000154 |
| LONP1        | lon peptidase 1, mitochondrial                                                | 1.51 | down | 0.001026 | 0.0001186 |
| LRP8         | low density lipoprotein receptor-related protein 8, apolipoprotein e receptor | 1.56 | down | 0.001638 | 0.0002367 |
| LRPPRC       | leucine-rich pentatricopeptide repeat containing                              | 1.63 | down | 0.001303 | 0.0001700 |
| LRRC20       | leucine rich repeat containing 20                                             | 1.64 | down | 0.000027 | 0.0000001 |
| LRRC61       | leucine rich repeat containing 61                                             | 1.52 | down | 0.004179 | 0.0008882 |
| LRRCC1       | leucine rich repeat and coiled-coil centrosomal protein 1                     | 2.03 | down | 0.000197 | 0.0000076 |
| LRRN2        | leucine rich repeat neuronal 2                                                | 1.76 | down | 0.000144 | 0.0000043 |
| LRTOMT       | leucine rich transmembrane and O-methyltransferase domain containing          | 1.57 | down | 0.001363 | 0.0001811 |
| LSS          | lanosterol synthase (2,3-oxidosqualene-lanosterol cyclase)                    | 1.83 | down | 0.002023 | 0.0003203 |
| LTV1         | LTV1 ribosome biogenesis factor                                               | 1.51 | down | 0.000059 | 0.0000007 |
| LUC7L3       | LUC7-like 3 ( <i>S. cerevisiae</i> )                                          | 3.27 | down | 0.004842 | 0.0010922 |
| LYPLAL1      | lysophospholipase-like 1                                                      | 1.60 | down | 0.000343 | 0.0000205 |
| LYRM4        | LYR motif containing 4                                                        | 1.51 | down | 0.003595 | 0.0007173 |

|            |                                                                                                 |      |      |          |           |
|------------|-------------------------------------------------------------------------------------------------|------|------|----------|-----------|
| LZTFL1     | leucine zipper transcription factor-like 1                                                      | 1.73 | down | 0.003098 | 0.0005828 |
| MAD1L1     | MAD1 mitotic arrest deficient-like 1 (yeast)                                                    | 1.77 | down | 0.000713 | 0.0000670 |
| MALL       | mal, T-cell differentiation protein-like                                                        | 1.80 | down | 0.000329 | 0.0000192 |
| MAP4       | microtubule-associated protein 4                                                                | 1.85 | down | 0.000389 | 0.0000248 |
| MARS       | methionyl-tRNA synthetase                                                                       | 1.66 | down | 0.000737 | 0.0000707 |
| MAT2A      | methionine adenosyltransferase II, alpha                                                        | 1.58 | down | 0.000121 | 0.0000032 |
| MBLAC2     | metallo-beta-lactamase domain containing 2                                                      | 2.12 | down | 0.000027 | 0.0000001 |
| MCM7       | minichromosome maintenance complex component 7                                                  | 1.76 | down | 0.000364 | 0.0000224 |
| MDC1       | mediator of DNA-damage checkpoint 1                                                             | 1.53 | down | 0.000185 | 0.0000067 |
| MED22      | mediator complex subunit 22                                                                     | 1.74 | down | 0.001333 | 0.0001751 |
| METAP2     | methionyl aminopeptidase 2                                                                      | 2.09 | down | 0.000102 | 0.0000022 |
| METTL10    | methyltransferase like 10                                                                       | 1.55 | down | 0.000678 | 0.0000625 |
| METTL12    | methyltransferase like 12                                                                       | 2.42 | down | 0.000178 | 0.0000062 |
| METTL16    | methyltransferase like 16                                                                       | 1.72 | down | 0.000648 | 0.0000586 |
| METTL25    | methyltransferase like 25                                                                       | 1.99 | down | 0.001402 | 0.0001895 |
| METTL3     | methyltransferase like 3                                                                        | 2.12 | down | 0.000294 | 0.0000158 |
| METTL4     | methyltransferase like 4                                                                        | 1.52 | down | 0.000669 | 0.0000613 |
| MFSD3      | major facilitator superfamily domain containing 3                                               | 1.70 | down | 0.000435 | 0.0000298 |
| MINA       | MYC induced nuclear antigen                                                                     | 1.58 | down | 0.003290 | 0.0006357 |
| MIPEP      | mitochondrial intermediate peptidase                                                            | 1.62 | down | 0.000195 | 0.0000074 |
| MIR4697HG  | MIR4697 host gene (non-protein coding)                                                          | 1.52 | down | 0.003773 | 0.0007639 |
| MIRLET7BHG | MIRLET7B host gene (non-protein coding)                                                         | 2.45 | down | 0.000794 | 0.0000797 |
| MIS18BP1   | MIS18 binding protein 1                                                                         | 1.57 | down | 0.003143 | 0.0005928 |
| MKX        | mohawk homeobox                                                                                 | 3.22 | down | 0.004296 | 0.0009258 |
| MLLT10     | myeloid/lymphoid or mixed-lineage leukemia (trithorax homolog, Drosophila); translocated to, 10 | 1.51 | down | 0.000149 | 0.0000046 |
| MLLT6      | myeloid/lymphoid or mixed-lineage leukemia (trithorax homolog, Drosophila); translocated to, 6  | 1.56 | down | 0.000894 | 0.0000957 |
| MMP11      | matrix metalloproteinase 11 (stromelysin 3)                                                     | 1.93 | down | 0.000289 | 0.0000151 |
| MNX1-AS1   | MNX1 antisense RNA 1 (head to head)                                                             | 1.71 | down | 0.002084 | 0.0003339 |

|         |                                                                            |      |      |          |           |
|---------|----------------------------------------------------------------------------|------|------|----------|-----------|
| MORN1   | MORN repeat containing 1                                                   | 2.72 | down | 0.000253 | 0.0000119 |
| MOS     | v-mos Moloney murine sarcoma viral oncogene homolog                        | 2.06 | down | 0.001835 | 0.0002808 |
| MPP7    | membrane protein, palmitoylated 7 (MAGUK p55 subfamily member 7)           | 1.66 | down | 0.000446 | 0.0000311 |
| MRM1    | mitochondrial rRNA methyltransferase 1 homolog (S. cerevisiae)             | 1.73 | down | 0.000582 | 0.0000495 |
| MRPS25  | mitochondrial ribosomal protein S25                                        | 2.44 | down | 0.000180 | 0.0000064 |
| MRPS31  | mitochondrial ribosomal protein S31                                        | 1.70 | down | 0.000533 | 0.0000431 |
| MRTO4   | mRNA turnover 4 homolog (S. cerevisiae)                                    | 1.76 | down | 0.002521 | 0.0004336 |
| MSTO1   | misato 1, mitochondrial distribution and morphology regulator              | 2.02 | down | 0.000124 | 0.0000033 |
| MTA1    | metastasis associated 1                                                    | 2.04 | down | 0.000638 | 0.0000569 |
| MTAP    | methylthioadenosine phosphorylase                                          | 1.81 | down | 0.000915 | 0.0000992 |
| MTFMT   | mitochondrial methionyl-tRNA formyltransferase                             | 1.51 | down | 0.000222 | 0.0000094 |
| MTHFD1L | methylenetetrahydrofolate dehydrogenase (NADP+ dependent) 1-like           | 1.61 | down | 0.000550 | 0.0000454 |
| MTL5    | metallothionein-like 5, testis-specific (tesmin)                           | 2.51 | down | 0.000269 | 0.0000134 |
| MTR     | 5-methyltetrahydrofolate-homocysteine methyltransferase                    | 1.77 | down | 0.002690 | 0.0004763 |
| MXRA7   | matrix-remodelling associated 7                                            | 1.58 | down | 0.002344 | 0.0003897 |
| MYC     | v-myc avian myelocytomatosis viral oncogene homolog                        | 1.69 | down | 0.001174 | 0.0001449 |
| MYCL    | v-myc avian myelocytomatosis viral oncogene lung carcinoma derived homolog | 1.79 | down | 0.000459 | 0.0000332 |
| MYCNOS  | MYCN opposite strand                                                       | 1.58 | down | 0.000295 | 0.0000159 |
| MYO5C   | myosin VC                                                                  | 1.84 | down | 0.000113 | 0.0000027 |
| N4BP1   | NEDD4 binding protein 1                                                    | 1.55 | down | 0.000169 | 0.0000058 |
| NAA15   | N(alpha)-acetyltransferase 15, NatA auxiliary subunit                      | 2.20 | down | 0.002703 | 0.0004790 |
| NADK    | NAD kinase                                                                 | 1.65 | down | 0.000253 | 0.0000120 |
| NAMPT   | nicotinamide phosphoribosyltransferase                                     | 1.82 | down | 0.002378 | 0.0003983 |
| NARS2   | asparaginyl-tRNA synthetase 2, mitochondrial (putative)                    | 1.93 | down | 0.000364 | 0.0000225 |
| NASP    | nuclear autoantigenic sperm protein (histone-binding)                      | 1.53 | down | 0.000306 | 0.0000168 |
| NDE1    | nudE neurodevelopment protein 1                                            | 1.87 | down | 0.000149 | 0.0000046 |
| NECAB3  | N-terminal EF-hand calcium binding protein 3                               | 1.53 | down | 0.000740 | 0.0000710 |



|           |                                                                                               |      |      |          |           |
|-----------|-----------------------------------------------------------------------------------------------|------|------|----------|-----------|
| NFATC1    | nuclear factor of activated T-cells, cytoplasmic, calcineurin-dependent 1                     | 2.01 | down | 0.000371 | 0.0000231 |
| NFATC2IP  | nuclear factor of activated T-cells, cytoplasmic, calcineurin-dependent 2 interacting protein | 1.61 | down | 0.000512 | 0.0000405 |
| NFYA      | nuclear transcription factor Y, alpha                                                         | 1.74 | down | 0.000751 | 0.0000733 |
| NFYB      | nuclear transcription factor Y, beta                                                          | 1.87 | down | 0.000020 | 0.0000000 |
| NIN       | ninein (GSK3B interacting protein)                                                            | 1.89 | down | 0.001382 | 0.0001853 |
| NKRF      | NFKB repressing factor                                                                        | 1.81 | down | 0.000008 | 0.0000000 |
| NKX2-5    | NK2 homeobox 5                                                                                | 1.52 | down | 0.004179 | 0.0008892 |
| NLE1      | notchless homolog 1 (Drosophila)                                                              | 2.33 | down | 0.001273 | 0.0001642 |
| NLRP2     | NLR family, pyrin domain containing 2                                                         | 1.63 | down | 0.000389 | 0.0000250 |
| NMD3      | NMD3 ribosome export adaptor                                                                  | 1.69 | down | 0.000290 | 0.0000153 |
| NOC3L     | nucleolar complex associated 3 homolog ( <i>S. cerevisiae</i> )                               | 2.05 | down | 0.000027 | 0.0000001 |
| NOL10     | nucleolar protein 10                                                                          | 1.95 | down | 0.000640 | 0.0000573 |
| NOL9      | nucleolar protein 9                                                                           | 1.52 | down | 0.000061 | 0.0000008 |
| NOP16     | NOP16 nucleolar protein                                                                       | 1.52 | down | 0.000222 | 0.0000094 |
| NOP56     | NOP56 ribonucleoprotein                                                                       | 1.65 | down | 0.000458 | 0.0000330 |
| NOP58     | NOP58 ribonucleoprotein                                                                       | 1.68 | down | 0.000134 | 0.0000038 |
| NPRL3     | nitrogen permease regulator-like 3 ( <i>S. cerevisiae</i> )                                   | 1.95 | down | 0.001129 | 0.0001367 |
| NPTN      | neuroplastin                                                                                  | 1.54 | down | 0.002314 | 0.0003833 |
| NR2F1-AS1 | NR2F1 antisense RNA 1                                                                         | 1.58 | down | 0.003486 | 0.0006862 |
| NR6A1     | nuclear receptor subfamily 6, group A, member 1                                               | 1.80 | down | 0.000775 | 0.0000771 |
| NREP      | neuronal regeneration related protein                                                         | 1.53 | down | 0.004048 | 0.0008483 |
| NSMCE2    | non-SMC element 2, MMS21 homolog ( <i>S. cerevisiae</i> )                                     | 1.71 | down | 0.000963 | 0.0001083 |
| NSUN2     | NOP2/Sun RNA methyltransferase family, member 2                                               | 1.76 | down | 0.000098 | 0.0000020 |
| NT5M      | 5',3'-nucleotidase, mitochondrial                                                             | 2.01 | down | 0.000220 | 0.0000093 |
| NTHL1     | nth endonuclease III-like 1 ( <i>E. coli</i> )                                                | 1.77 | down | 0.000429 | 0.0000290 |
| NTSR1     | neurotensin receptor 1 (high affinity)                                                        | 2.75 | down | 0.000061 | 0.0000009 |
| NUDT18    | nudix (nucleoside diphosphate linked moiety X)-type motif 18                                  | 1.66 | down | 0.000691 | 0.0000642 |
| NUFIP1    | nuclear fragile X mental retardation protein interacting protein 1                            | 2.36 | down | 0.000477 | 0.0000353 |

|          |                                                                             |      |      |          |           |
|----------|-----------------------------------------------------------------------------|------|------|----------|-----------|
| NUFIP2   | nuclear fragile X mental retardation protein interacting protein 2          | 1.56 | down | 0.000630 | 0.0000557 |
| NUP133   | nucleoporin 133kDa                                                          | 1.62 | down | 0.004418 | 0.0009617 |
| NUP35    | nucleoporin 35kDa                                                           | 1.58 | down | 0.001883 | 0.0002915 |
| NUP98    | nucleoporin 98kDa                                                           | 1.70 | down | 0.001451 | 0.0001991 |
| OARD1    | O-acyl-ADP-ribose deacylase 1                                               | 2.17 | down | 0.000060 | 0.0000008 |
| OBSL1    | obscurin-like 1                                                             | 1.54 | down | 0.003484 | 0.0006853 |
| ODF3B    | outer dense fiber of sperm tails 3B                                         | 2.05 | down | 0.000321 | 0.0000183 |
| OLA1     | Obg-like ATPase 1                                                           | 2.36 | down | 0.000753 | 0.0000736 |
| OPA1     | optic atrophy 1 (autosomal dominant)                                        | 1.53 | down | 0.001445 | 0.0001981 |
| OR51B5   | olfactory receptor, family 51, subfamily B, member 5                        | 3.45 | down | 0.000061 | 0.0000009 |
| ORC2     | origin recognition complex, subunit 2                                       | 1.56 | down | 0.001045 | 0.0001219 |
| OSBPL1A  | oxysterol binding protein-like 1A                                           | 1.91 | down | 0.000061 | 0.0000008 |
| OSBPL5   | oxysterol binding protein-like 5                                            | 1.67 | down | 0.002152 | 0.0003480 |
| OSGEPL1  | O-sialoglycoprotein endopeptidase-like 1                                    | 2.35 | down | 0.000613 | 0.0000532 |
| OTUD6B   | OTU domain containing 6B                                                    | 1.93 | down | 0.000771 | 0.0000763 |
| PACS2    | phosphofurin acidic cluster sorting protein 2                               | 3.17 | down | 0.000539 | 0.0000439 |
| PAFAH1B1 | platelet-activating factor acetylhydrolase 1b, regulatory subunit 1 (45kDa) | 2.05 | down | 0.000426 | 0.0000287 |
| PAFAH2   | platelet-activating factor acetylhydrolase 2, 40kDa                         | 1.51 | down | 0.003907 | 0.0008043 |
| PAIP1    | poly(A) binding protein interacting protein 1                               | 1.70 | down | 0.001402 | 0.0001897 |
| PALD1    | phosphatase domain containing, paladin 1                                    | 1.70 | down | 0.000086 | 0.0000016 |
| PARPBP   | PARP1 binding protein                                                       | 1.58 | down | 0.001809 | 0.0002749 |
| PARVB    | parvin, beta                                                                | 2.66 | down | 0.000070 | 0.0000011 |
| PCF11    | PCF11 cleavage and polyadenylation factor subunit                           | 2.56 | down | 0.000022 | 0.0000001 |
| PCK2     | phosphoenolpyruvate carboxykinase 2 (mitochondrial)                         | 2.04 | down | 0.001122 | 0.0001356 |
| PCM1     | pericentriolar material 1                                                   | 1.75 | down | 0.001805 | 0.0002736 |
| PCSK1N   | proprotein convertase subtilisin/kexin type 1 inhibitor                     | 1.57 | down | 0.000723 | 0.0000687 |
| PCSK6    | proprotein convertase subtilisin/kexin type 6                               | 1.96 | down | 0.002168 | 0.0003512 |
| PCSK9    | proprotein convertase subtilisin/kexin type 9                               | 1.54 | down | 0.000198 | 0.0000076 |

|          |                                                                             |      |      |          |           |
|----------|-----------------------------------------------------------------------------|------|------|----------|-----------|
| PDCD6IP  | programmed cell death 6 interacting protein                                 | 1.81 | down | 0.001513 | 0.0002120 |
| PDE3B    | phosphodiesterase 3B, cGMP-inhibited                                        | 1.66 | down | 0.001120 | 0.0001351 |
| PDE9A    | phosphodiesterase 9A                                                        | 1.79 | down | 0.000452 | 0.0000320 |
| PDK1     | pyruvate dehydrogenase kinase, isozyme 1                                    | 1.72 | down | 0.000773 | 0.0000766 |
| PDP1     | pyruvate dehydrogenase phosphatase catalytic subunit 1                      | 1.66 | down | 0.000426 | 0.0000286 |
| PDS5A    | PDS5, regulator of cohesion maintenance, homolog A ( <i>S. cerevisiae</i> ) | 1.77 | down | 0.000109 | 0.0000026 |
| PDS5B    | PDS5, regulator of cohesion maintenance, homolog B ( <i>S. cerevisiae</i> ) | 2.84 | down | 0.000056 | 0.0000007 |
| PECR     | peroxisomal trans-2-enoyl-CoA reductase                                     | 1.54 | down | 0.000737 | 0.0000706 |
| PEMT     | phosphatidylethanolamine N-methyltransferase                                | 1.62 | down | 0.000967 | 0.0001089 |
| PGLS     | 6-phosphogluconolactonase                                                   | 1.77 | down | 0.000108 | 0.0000025 |
| PHF19    | PHD finger protein 19                                                       | 1.65 | down | 0.000304 | 0.0000167 |
| PHOSPHO2 | phosphatase, orphan 2                                                       | 1.68 | down | 0.003252 | 0.0006224 |
| PIF1     | PIF1 5'-to-3' DNA helicase                                                  | 4.26 | down | 0.000044 | 0.0000004 |
| PIH1D1   | PIH1 domain containing 1                                                    | 1.55 | down | 0.000323 | 0.0000184 |
| PINX1    | PIN2/TERF1 interacting, telomerase inhibitor 1                              | 1.84 | down | 0.002210 | 0.0003602 |
| PITPNA   | phosphatidylinositol transfer protein, alpha                                | 1.58 | down | 0.000049 | 0.0000005 |
| PKD1     | polycystic kidney disease 1 (autosomal dominant)                            | 1.53 | down | 0.000528 | 0.0000422 |
| PLAC1    | placenta-specific 1                                                         | 1.76 | down | 0.001871 | 0.0002885 |
| PLAGL2   | pleiomorphic adenoma gene-like 2                                            | 1.59 | down | 0.001204 | 0.0001504 |
| PLCB2    | phospholipase C, beta 2                                                     | 1.74 | down | 0.000591 | 0.0000508 |
| PLCH1    | phospholipase C, eta 1                                                      | 2.34 | down | 0.002990 | 0.0005528 |
| PLEKHJ1  | pleckstrin homology domain containing, family J member 1                    | 1.79 | down | 0.003663 | 0.0007348 |
| PLK1     | polo-like kinase 1                                                          | 3.04 | down | 0.000206 | 0.0000082 |
| PLK4     | polo-like kinase 4                                                          | 1.92 | down | 0.001131 | 0.0001374 |
| PLXNA1   | plexin A1                                                                   | 1.57 | down | 0.003927 | 0.0008100 |
| PMM2     | phosphomannomutase 2                                                        | 1.73 | down | 0.000171 | 0.0000059 |
| PMS1     | PMS1 postmeiotic segregation increased 1 ( <i>S. cerevisiae</i> )           | 1.65 | down | 0.000390 | 0.0000251 |
| PNN      | pinin, desmosome associated protein                                         | 2.15 | down | 0.002552 | 0.0004417 |

|          |                                                                                                           |      |      |          |           |
|----------|-----------------------------------------------------------------------------------------------------------|------|------|----------|-----------|
| PNPT1    | polyribonucleotide nucleotidyltransferase 1                                                               | 1.55 | down | 0.001853 | 0.0002843 |
| POLR1B   | polymerase (RNA) I polypeptide B, 128kDa                                                                  | 2.11 | down | 0.004667 | 0.0010406 |
| POLR3G   | polymerase (RNA) III (DNA directed) polypeptide G (32kD)                                                  | 1.81 | down | 0.003154 | 0.0005964 |
| POLR3H   | polymerase (RNA) III (DNA directed) polypeptide H (22.9kD)                                                | 1.57 | down | 0.000867 | 0.0000913 |
| PP7080   | uncharacterized LOC25845                                                                                  | 1.87 | down | 0.000132 | 0.0000037 |
| PPARGC1B | peroxisome proliferator-activated receptor gamma, coactivator 1 beta                                      | 1.73 | down | 0.003267 | 0.0006299 |
| PPFIA3   | protein tyrosine phosphatase, receptor type, f polypeptide (PTPRF), interacting protein (liprin), alpha 3 | 1.55 | down | 0.000162 | 0.0000052 |
| PPHLN1   | periphilin 1                                                                                              | 1.95 | down | 0.001156 | 0.0001416 |
| PPIEL    | peptidylprolyl isomerase E-like pseudogene                                                                | 1.70 | down | 0.000765 | 0.0000755 |
| PPIL6    | peptidylprolyl isomerase (cyclophilin)-like 6                                                             | 1.56 | down | 0.000288 | 0.0000151 |
| PPIP5K1  | diphosphoinositol pentakisphosphate kinase 1                                                              | 1.76 | down | 0.001810 | 0.0002754 |
| PPP2R3C  | protein phosphatase 2, regulatory subunit B", gamma                                                       | 1.55 | down | 0.004107 | 0.0008657 |
| PPP3CB   | protein phosphatase 3, catalytic subunit, beta isozyme                                                    | 1.77 | down | 0.002555 | 0.0004424 |
| PPP6C    | protein phosphatase 6, catalytic subunit                                                                  | 2.65 | down | 0.000538 | 0.0000438 |
| PPP6R2   | protein phosphatase 6, regulatory subunit 2                                                               | 1.86 | down | 0.000209 | 0.0000085 |
| PPP6R3   | protein phosphatase 6, regulatory subunit 3                                                               | 1.97 | down | 0.000068 | 0.0000010 |
| PRDM16   | PR domain containing 16                                                                                   | 2.40 | down | 0.000289 | 0.0000151 |
| PRELID2  | PRELI domain containing 2                                                                                 | 1.52 | down | 0.001501 | 0.0002091 |
| PRKAA1   | protein kinase, AMP-activated, alpha 1 catalytic subunit                                                  | 1.72 | down | 0.003099 | 0.0005830 |
| PRKACB   | protein kinase, cAMP-dependent, catalytic, beta                                                           | 3.82 | down | 0.000079 | 0.0000014 |
| PRKAG1   | protein kinase, AMP-activated, gamma 1 non-catalytic subunit                                              | 2.04 | down | 0.000165 | 0.0000054 |
| PRKCDBP  | protein kinase C, delta binding protein                                                                   | 1.86 | down | 0.000800 | 0.0000805 |
| PRMT3    | protein arginine methyltransferase 3                                                                      | 2.08 | down | 0.000015 | 0.0000000 |
| PRMT6    | protein arginine methyltransferase 6                                                                      | 1.69 | down | 0.000014 | 0.0000000 |
| PRMT7    | protein arginine methyltransferase 7                                                                      | 1.65 | down | 0.001225 | 0.0001542 |
| PRPF38B  | pre-mRNA processing factor 38B                                                                            | 1.75 | down | 0.001298 | 0.0001690 |
| PRPF4B   | pre-mRNA processing factor 4B                                                                             | 1.61 | down | 0.003727 | 0.0007518 |
| PRR22    | proline rich 22                                                                                           | 2.59 | down | 0.000073 | 0.0000012 |

|           |                                                              |      |      |          |           |
|-----------|--------------------------------------------------------------|------|------|----------|-----------|
| PRRC2B    | proline-rich coiled-coil 2B                                  | 1.53 | down | 0.000917 | 0.0000996 |
| PSKH1     | protein serine kinase H1                                     | 2.93 | down | 0.000197 | 0.0000075 |
| PSMG4     | proteasome (prosome, macropain) assembly chaperone 4         | 1.93 | down | 0.002484 | 0.0004241 |
| PSRC1     | proline/serine-rich coiled-coil 1                            | 2.17 | down | 0.000458 | 0.0000329 |
| PTCD3     | pentatricopeptide repeat domain 3                            | 1.76 | down | 0.003153 | 0.0005959 |
| PTK2      | protein tyrosine kinase 2                                    | 1.65 | down | 0.000329 | 0.0000191 |
| PTP4A3    | protein tyrosine phosphatase type IVA, member 3              | 1.81 | down | 0.002756 | 0.0004928 |
| PTPLAD1   | protein tyrosine phosphatase-like A domain containing 1      | 1.53 | down | 0.004630 | 0.0010279 |
| PTTG2     | pituitary tumor-transforming 2                               | 1.57 | down | 0.001420 | 0.0001932 |
| PUS1      | pseudouridylate synthase 1                                   | 1.57 | down | 0.002623 | 0.0004602 |
| PUS7      | pseudouridylate synthase 7 (putative)                        | 2.03 | down | 0.000655 | 0.0000592 |
| PVRL2     | poliovirus receptor-related 2 (herpesvirus entry mediator B) | 1.75 | down | 0.000390 | 0.0000251 |
| PVRL3     | poliovirus receptor-related 3                                | 1.73 | down | 0.001661 | 0.0002416 |
| PWP1      | PWP1 homolog ( <i>S. cerevisiae</i> )                        | 1.58 | down | 0.002049 | 0.0003251 |
| PYCR1     | pyrroline-5-carboxylate reductase 1                          | 1.93 | down | 0.003262 | 0.0006281 |
| PYCR1L    | pyrroline-5-carboxylate reductase-like                       | 1.82 | down | 0.000061 | 0.0000009 |
| PYROXD1   | pyridine nucleotide-disulphide oxidoreductase domain 1       | 1.89 | down | 0.000460 | 0.0000333 |
| R3HDM2    | R3H domain containing 2                                      | 1.73 | down | 0.000192 | 0.0000072 |
| RAB11A    | RAB11A, member RAS oncogene family                           | 1.53 | down | 0.001465 | 0.0002015 |
| RAB11FIP4 | RAB11 family interacting protein 4 (class II)                | 2.56 | down | 0.000191 | 0.0000071 |
| RAB26     | RAB26, member RAS oncogene family                            | 1.94 | down | 0.000569 | 0.0000479 |
| RABGAP1L  | RAB GTPase activating protein 1-like                         | 2.06 | down | 0.002483 | 0.0004236 |
| RABL2A    | RAB, member of RAS oncogene family-like 2A                   | 1.53 | down | 0.000533 | 0.0000431 |
| RACGAP1   | Rac GTPase activating protein 1                              | 1.59 | down | 0.000159 | 0.0000051 |
| RAD50     | RAD50 homolog ( <i>S. cerevisiae</i> )                       | 1.64 | down | 0.000022 | 0.0000001 |
| RALGPS1   | Ral GEF with PH domain and SH3 binding motif 1               | 1.56 | down | 0.002462 | 0.0004177 |
| RANBP2    | RAN binding protein 2                                        | 1.73 | down | 0.002107 | 0.0003386 |
| RARS2     | arginyl-tRNA synthetase 2, mitochondrial                     | 1.60 | down | 0.000220 | 0.0000093 |
| RBBP4     | retinoblastoma binding protein 4                             | 1.57 | down | 0.002917 | 0.0005323 |
| RBM12     | RNA binding motif protein 12                                 | 2.59 | down | 0.000123 | 0.0000033 |

|          |                                                                                       |      |      |          |           |
|----------|---------------------------------------------------------------------------------------|------|------|----------|-----------|
| RCC2     | regulator of chromosome condensation 2                                                | 1.64 | down | 0.001508 | 0.0002107 |
| RDM1     | RAD52 motif containing 1                                                              | 1.62 | down | 0.002640 | 0.0004641 |
| REEP5    | receptor accessory protein 5                                                          | 1.58 | down | 0.000959 | 0.0001078 |
| RET      | ret proto-oncogene                                                                    | 2.07 | down | 0.003714 | 0.0007490 |
| RHOBTB1  | Rho-related BTB domain containing 1                                                   | 1.63 | down | 0.001402 | 0.0001897 |
| RHOBTB3  | Rho-related BTB domain containing 3                                                   | 1.58 | down | 0.000390 | 0.0000251 |
| RMDN2    | regulator of microtubule dynamics 2                                                   | 1.56 | down | 0.004490 | 0.0009836 |
| RNA5-8S5 | RNA, 5.8S ribosomal 5                                                                 | 1.85 | down | 0.003397 | 0.0006637 |
| RNF141   | ring finger protein 141                                                               | 1.84 | down | 0.000255 | 0.0000122 |
| RNF145   | ring finger protein 145                                                               | 1.58 | down | 0.000437 | 0.0000301 |
| RNF207   | ring finger protein 207                                                               | 1.53 | down | 0.000971 | 0.0001096 |
| RNF213   | ring finger protein 213                                                               | 1.74 | down | 0.000776 | 0.0000773 |
| RNF216   | ring finger protein 216                                                               | 1.58 | down | 0.000956 | 0.0001068 |
| RNF222   | ring finger protein 222                                                               | 1.57 | down | 0.004695 | 0.0010492 |
| ROCK2    | Rho-associated, coiled-coil containing protein kinase 2                               | 1.82 | down | 0.001023 | 0.0001180 |
| RPL10A   | ribosomal protein L10a                                                                | 2.26 | down | 0.002988 | 0.0005512 |
| RPL22L1  | ribosomal protein L22-like 1                                                          | 6.99 | down | 0.000259 | 0.0000125 |
| RPL3     | ribosomal protein L3                                                                  | 2.10 | down | 0.001269 | 0.0001631 |
| RPL37    | ribosomal protein L37                                                                 | 1.62 | down | 0.002118 | 0.0003410 |
| RPP25L   | ribonuclease P/MRP 25kDa subunit-like                                                 | 1.57 | down | 0.001470 | 0.0002028 |
| RPRD1A   | regulation of nuclear pre-mRNA domain containing 1A                                   | 2.16 | down | 0.000598 | 0.0000515 |
| RPS14    | ribosomal protein S14                                                                 | 2.36 | down | 0.000125 | 0.0000034 |
| RPS6KB1  | ribosomal protein S6 kinase, 70kDa, polypeptide 1                                     | 2.12 | down | 0.000060 | 0.0000008 |
| RPUSD3   | RNA pseudouridylate synthase domain containing 3                                      | 1.76 | down | 0.000548 | 0.0000451 |
| RPUSD4   | RNA pseudouridylate synthase domain containing 4                                      | 2.50 | down | 0.000044 | 0.0000004 |
| RRP15    | ribosomal RNA processing 15 homolog ( <i>S. cerevisiae</i> )                          | 1.57 | down | 0.001153 | 0.0001411 |
| RRP9     | ribosomal RNA processing 9, small subunit (SSU) processome component, homolog (yeast) | 1.59 | down | 0.000408 | 0.0000268 |
| RRS1     | RRS1 ribosome biogenesis regulator homolog ( <i>S. cerevisiae</i> )                   | 1.53 | down | 0.000823 | 0.0000836 |
| RSC1A1   | regulatory solute carrier protein, family 1, member 1                                 | 1.53 | down | 0.004090 | 0.0008596 |

|          |                                                                    |      |      |          |           |
|----------|--------------------------------------------------------------------|------|------|----------|-----------|
| RSPH3    | radial spoke 3 homolog (Chlamydomonas)                             | 1.58 | down | 0.000539 | 0.0000440 |
| RTDR1    | rhabdoid tumor deletion region gene 1                              | 2.68 | down | 0.002600 | 0.0004536 |
| S100BPB  | S100P binding protein                                              | 1.62 | down | 0.001528 | 0.0002150 |
| SAPCD2   | suppressor APC domain containing 2                                 | 1.80 | down | 0.000093 | 0.0000018 |
| SBNO1    | strawberry notch homolog 1 (Drosophila)                            | 2.27 | down | 0.000083 | 0.0000015 |
| SCAMP1   | secretory carrier membrane protein 1                               | 1.90 | down | 0.001546 | 0.0002185 |
| SCARA3   | scavenger receptor class A, member 3                               | 1.89 | down | 0.000454 | 0.0000324 |
| SCARNA13 | small Cajal body-specific RNA 13                                   | 6.16 | down | 0.000010 | 0.0000000 |
| SCARNA17 | small Cajal body-specific RNA 17                                   | 1.97 | down | 0.004563 | 0.0010065 |
| SCARNA9  | small Cajal body-specific RNA 9                                    | 1.93 | down | 0.001066 | 0.0001256 |
| SCD      | stearoyl-CoA desaturase (delta-9-desaturase)                       | 1.85 | down | 0.000426 | 0.0000286 |
| SCLY     | selenocysteine lyase                                               | 1.58 | down | 0.000325 | 0.0000186 |
| SDAD1    | SDA1 domain containing 1                                           | 1.68 | down | 0.000150 | 0.0000046 |
| SEC11A   | SEC11 homolog A (S. cerevisiae)                                    | 1.51 | down | 0.000255 | 0.0000122 |
| SEC23A   | Sec23 homolog A (S. cerevisiae)                                    | 1.69 | down | 0.002107 | 0.0003384 |
| SEC23IP  | SEC23 interacting protein                                          | 1.62 | down | 0.000907 | 0.0000977 |
| SEC24A   | SEC24 family member A                                              | 1.51 | down | 0.003253 | 0.0006239 |
| SEC63    | SEC63 homolog (S. cerevisiae)                                      | 1.98 | down | 0.004309 | 0.0009294 |
| SECISBP2 | SECIS binding protein 2                                            | 1.86 | down | 0.000079 | 0.0000014 |
| SEPT10   | septin 10                                                          | 1.50 | down | 0.003513 | 0.0006948 |
| SERBP1   | SERPINE1 mRNA binding protein 1                                    | 1.57 | down | 0.000528 | 0.0000422 |
| SETD6    | SET domain containing 6                                            | 1.69 | down | 0.001362 | 0.0001808 |
| SFPQ     | splicing factor proline/glutamine-rich                             | 1.52 | down | 0.001264 | 0.0001620 |
| SGOL2    | shugoshin-like 2 (S. pombe)                                        | 1.97 | down | 0.000488 | 0.0000369 |
| SH3PXD2B | SH3 and PX domains 2B                                              | 1.59 | down | 0.001276 | 0.0001646 |
| SHPRH    | SNF2 histone linker PHD RING helicase, E3 ubiquitin protein ligase | 2.14 | down | 0.002070 | 0.0003312 |
| SIM2     | single-minded family bHLH transcription factor 2                   | 2.59 | down | 0.000247 | 0.0000113 |
| SIRT5    | sirtuin 5                                                          | 1.77 | down | 0.002186 | 0.0003552 |

|          |                                                                                             |      |      |          |           |
|----------|---------------------------------------------------------------------------------------------|------|------|----------|-----------|
| SLC11A2  | solute carrier family 11 (proton-coupled divalent metal ion transporter), member 2          | 1.93 | down | 0.000722 | 0.0000685 |
| SLC18B1  | solute carrier family 18, subfamily B, member 1                                             | 1.97 | down | 0.000307 | 0.0000169 |
| SLC25A13 | solute carrier family 25 (aspartate/glutamate carrier), member 13                           | 1.90 | down | 0.000027 | 0.0000001 |
| SLC25A32 | solute carrier family 25 (mitochondrial folate carrier), member 32                          | 1.76 | down | 0.003090 | 0.0005800 |
| SLC25A37 | solute carrier family 25 (mitochondrial iron transporter), member 37                        | 1.63 | down | 0.000234 | 0.0000103 |
| SLC25A6  | solute carrier family 25 (mitochondrial carrier; adenine nucleotide translocator), member 6 | 1.82 | down | 0.000119 | 0.0000031 |
| SLC30A9  | solute carrier family 30 (zinc transporter), member 9                                       | 1.91 | down | 0.000102 | 0.0000022 |
| SLC35B4  | solute carrier family 35 (UDP-xylose/UDP-N-acetylglucosamine transporter), member B4        | 2.28 | down | 0.000753 | 0.0000735 |
| SLC35F5  | solute carrier family 35, member F5                                                         | 2.23 | down | 0.002175 | 0.0003529 |
| SLC35G1  | solute carrier family 35, member G1                                                         | 2.14 | down | 0.001496 | 0.0002080 |
| SLC38A1  | solute carrier family 38, member 1                                                          | 1.57 | down | 0.000135 | 0.0000039 |
| SLC39A11 | solute carrier family 39, member 11                                                         | 1.64 | down | 0.000262 | 0.0000127 |
| SLC5A6   | solute carrier family 5 (sodium/multivitamin and iodide cotransporter), member 6            | 1.68 | down | 0.000044 | 0.0000004 |
| SLC6A8   | solute carrier family 6 (neurotransmitter transporter), member 8                            | 1.53 | down | 0.001495 | 0.0002077 |
| SLC6A9   | solute carrier family 6 (neurotransmitter transporter, glycine), member 9                   | 1.67 | down | 0.000786 | 0.0000787 |
| SLC7A11  | solute carrier family 7 (anionic amino acid transporter light chain, xc- system), member 11 | 1.56 | down | 0.004947 | 0.0011250 |
| SLC7A2   | solute carrier family 7 (cationic amino acid transporter, y+ system), member 2              | 2.78 | down | 0.000017 | 0.0000000 |
| SLC9A8   | solute carrier family 9, subfamily A (NHE8, cation proton antiporter 8), member 8           | 1.72 | down | 0.002062 | 0.0003288 |
| SMCHD1   | structural maintenance of chromosomes flexible hinge domain containing 1                    | 1.82 | down | 0.000710 | 0.0000667 |
| SMIM19   | small integral membrane protein 19                                                          | 2.15 | down | 0.000044 | 0.0000004 |
| SNHG1    | small nucleolar RNA host gene 1 (non-protein coding)                                        | 1.56 | down | 0.000488 | 0.0000370 |
| SNHG10   | small nucleolar RNA host gene 10 (non-protein coding)                                       | 2.19 | down | 0.000878 | 0.0000931 |



|         |                                                                                |      |      |          |           |
|---------|--------------------------------------------------------------------------------|------|------|----------|-----------|
| SNHG12  | small nucleolar RNA host gene 12 (non-protein coding)                          | 1.59 | down | 0.002471 | 0.0004209 |
| SNHG15  | small nucleolar RNA host gene 15 (non-protein coding)                          | 1.57 | down | 0.000454 | 0.0000324 |
| SNHG17  | small nucleolar RNA host gene 17 (non-protein coding)                          | 1.66 | down | 0.000450 | 0.0000317 |
| SNHG20  | small nucleolar RNA host gene 20 (non-protein coding)                          | 1.68 | down | 0.004499 | 0.0009873 |
| SNHG3   | small nucleolar RNA host gene 3 (non-protein coding)                           | 1.71 | down | 0.000219 | 0.0000091 |
| SNHG7   | small nucleolar RNA host gene 7 (non-protein coding)                           | 2.55 | down | 0.001195 | 0.0001482 |
| SOBP    | sine oculis binding protein homolog (Drosophila)                               | 1.59 | down | 0.000272 | 0.0000136 |
| SON     | SON DNA binding protein                                                        | 2.37 | down | 0.000250 | 0.0000116 |
| SORD    | sorbitol dehydrogenase                                                         | 1.94 | down | 0.002062 | 0.0003283 |
| SOX4    | SRY (sex determining region Y)-box 4                                           | 2.13 | down | 0.000282 | 0.0000146 |
| SPEF2   | sperm flagellar 2                                                              | 3.17 | down | 0.001002 | 0.0001149 |
| SPEN    | spen family transcriptional repressor                                          | 1.67 | down | 0.004254 | 0.0009115 |
| SPTLC2  | serine palmitoyltransferase, long chain base subunit 2                         | 2.16 | down | 0.000027 | 0.0000001 |
| SRBD1   | S1 RNA binding domain 1                                                        | 1.94 | down | 0.000263 | 0.0000128 |
| SREBF1  | sterol regulatory element binding transcription factor 1                       | 1.73 | down | 0.001741 | 0.0002595 |
| SRGAP3  | SLIT-ROBO Rho GTPase activating protein 3                                      | 1.50 | down | 0.000656 | 0.0000594 |
| SRPK1   | SRSF protein kinase 1                                                          | 1.65 | down | 0.000624 | 0.0000550 |
| SRSF1   | serine/arginine-rich splicing factor 1                                         | 2.39 | down | 0.000915 | 0.0000991 |
| SRSF3   | serine/arginine-rich splicing factor 3                                         | 1.65 | down | 0.001493 | 0.0002069 |
| SRSF5   | serine/arginine-rich splicing factor 5                                         | 1.56 | down | 0.002733 | 0.0004862 |
| SSU72   | SSU72 RNA polymerase II CTD phosphatase homolog ( <i>S. cerevisiae</i> )       | 1.93 | down | 0.002750 | 0.0004909 |
| ST13    | suppression of tumorigenicity 13 (colon carcinoma) (Hsp70 interacting protein) | 1.54 | down | 0.000074 | 0.0000012 |
| ST3GAL3 | ST3 beta-galactoside alpha-2,3-sialyltransferase 3                             | 2.05 | down | 0.000413 | 0.0000273 |
| ST3GAL6 | ST3 beta-galactoside alpha-2,3-sialyltransferase 6                             | 1.94 | down | 0.000014 | 0.0000000 |
| ST6GAL1 | ST6 beta-galactosamide alpha-2,6-sialyltransferase 1                           | 1.86 | down | 0.000051 | 0.0000006 |
| STAG3   | stromal antigen 3                                                              | 1.52 | down | 0.003846 | 0.0007830 |
| STARD8  | StAR-related lipid transfer (START) domain containing 8                        | 2.69 | down | 0.000174 | 0.0000060 |
| STK33   | serine/threonine kinase 33                                                     | 1.68 | down | 0.000463 | 0.0000336 |

|          |                                                                                   |      |      |          |           |
|----------|-----------------------------------------------------------------------------------|------|------|----------|-----------|
| STOX1    | storkhead box 1                                                                   | 1.74 | down | 0.003784 | 0.0007662 |
| STRADB   | STE20-related kinase adaptor beta                                                 | 1.85 | down | 0.000386 | 0.0000246 |
| SUGP2    | SURP and G patch domain containing 2                                              | 1.58 | down | 0.001511 | 0.0002115 |
| SURF6    | surfeit 6                                                                         | 1.96 | down | 0.000301 | 0.0000164 |
| SYNCRIP  | synaptotagmin binding, cytoplasmic RNA interacting protein                        | 1.65 | down | 0.000276 | 0.0000139 |
| TACC3    | transforming, acidic coiled-coil containing protein 3                             | 1.51 | down | 0.001078 | 0.0001278 |
| TAF1     | TAF1 RNA polymerase II, TATA box binding protein (TBP)-associated factor, 250kDa  | 1.59 | down | 0.000163 | 0.0000053 |
| TAF12    | TAF12 RNA polymerase II, TATA box binding protein (TBP)-associated factor, 20kDa  | 1.77 | down | 0.000081 | 0.0000014 |
| TAF15    | TAF15 RNA polymerase II, TATA box binding protein (TBP)-associated factor, 68kDa  | 2.26 | down | 0.000062 | 0.0000009 |
| TAF4B    | TAF4b RNA polymerase II, TATA box binding protein (TBP)-associated factor, 105kDa | 1.84 | down | 0.000850 | 0.0000878 |
| TARDBP   | TAR DNA binding protein                                                           | 3.42 | down | 0.000512 | 0.0000404 |
| TBC1D20  | TBC1 domain family, member 20                                                     | 1.64 | down | 0.001440 | 0.0001972 |
| TBC1D22A | TBC1 domain family, member 22A                                                    | 1.81 | down | 0.000263 | 0.0000128 |
| TBC1D22B | TBC1 domain family, member 22B                                                    | 1.53 | down | 0.001493 | 0.0002069 |
| TBC1D31  | TBC1 domain family, member 31                                                     | 1.50 | down | 0.002127 | 0.0003429 |
| TBCD     | tubulin folding cofactor D                                                        | 1.52 | down | 0.000438 | 0.0000302 |
| TBL3     | transducin (beta)-like 3                                                          | 1.88 | down | 0.000047 | 0.0000005 |
| TCF7L2   | transcription factor 7-like 2 (T-cell specific, HMG-box)                          | 1.89 | down | 0.001009 | 0.0001161 |
| TCFL5    | transcription factor-like 5 (basic helix-loop-helix)                              | 2.41 | down | 0.000014 | 0.0000000 |
| TECPR2   | tectonin beta-propeller repeat containing 2                                       | 1.57 | down | 0.000368 | 0.0000229 |
| TEKT4    | tektin 4                                                                          | 2.99 | down | 0.000325 | 0.0000186 |
| TESPA1   | thymocyte expressed, positive selection associated 1                              | 1.52 | down | 0.001741 | 0.0002591 |
| TEX10    | testis expressed 10                                                               | 1.54 | down | 0.000109 | 0.0000026 |
| TEX19    | testis expressed 19                                                               | 1.86 | down | 0.000677 | 0.0000624 |
| TFRC     | transferrin receptor                                                              | 1.65 | down | 0.000030 | 0.0000002 |
| TGIF1    | TGFB-induced factor homeobox 1                                                    | 1.63 | down | 0.001111 | 0.0001336 |
| THEM4    | thioesterase superfamily member 4                                                 | 1.92 | down | 0.000124 | 0.0000033 |

|            |                                                                           |      |      |          |           |
|------------|---------------------------------------------------------------------------|------|------|----------|-----------|
| THEM6      | thioesterase superfamily member 6                                         | 2.38 | down | 0.000195 | 0.0000074 |
| THNSL1     | threonine synthase-like 1 ( <i>S. cerevisiae</i> )                        | 2.01 | down | 0.000472 | 0.0000346 |
| THOC2      | THO complex 2                                                             | 1.67 | down | 0.000851 | 0.0000886 |
| TIA1       | TIA1 cytotoxic granule-associated RNA binding protein                     | 2.07 | down | 0.003256 | 0.0006260 |
| TIMM23B    | translocase of inner mitochondrial membrane 23 homolog B ( <i>yeast</i> ) | 1.89 | down | 0.004225 | 0.0009041 |
| TLE6       | transducin-like enhancer of split 6                                       | 1.58 | down | 0.001781 | 0.0002684 |
| TM4SF18    | transmembrane 4 L six family member 18                                    | 2.64 | down | 0.000282 | 0.0000145 |
| TMBIM4     | transmembrane BAX inhibitor motif containing 4                            | 2.77 | down | 0.001298 | 0.0001688 |
| TMEM129    | transmembrane protein 129                                                 | 2.56 | down | 0.000197 | 0.0000075 |
| TMEM17     | transmembrane protein 17                                                  | 1.61 | down | 0.001124 | 0.0001358 |
| TMEM181    | transmembrane protein 181                                                 | 1.64 | down | 0.000846 | 0.0000873 |
| TMEM187    | transmembrane protein 187                                                 | 2.07 | down | 0.000283 | 0.0000146 |
| TMEM248    | transmembrane protein 248                                                 | 1.93 | down | 0.000006 | 0.0000000 |
| TMEM67     | transmembrane protein 67                                                  | 1.73 | down | 0.001094 | 0.0001305 |
| TMX2       | thioredoxin-related transmembrane protein 2                               | 1.65 | down | 0.000184 | 0.0000067 |
| TNFAIP8L1  | tumor necrosis factor, alpha-induced protein 8-like 1                     | 1.57 | down | 0.002345 | 0.0003901 |
| TNFRSF13C  | tumor necrosis factor receptor superfamily, member 13C                    | 1.57 | down | 0.000294 | 0.0000157 |
| TNFRSF18   | tumor necrosis factor receptor superfamily, member 18                     | 1.51 | down | 0.000497 | 0.0000382 |
| TOLLIP-AS1 | TOLLIP antisense RNA 1 (head to head)                                     | 2.19 | down | 0.000695 | 0.0000648 |
| TRA2B      | transformer 2 beta homolog ( <i>Drosophila</i> )                          | 1.70 | down | 0.001336 | 0.0001758 |
| TRAPPC12   | trafficking protein particle complex 12                                   | 1.83 | down | 0.000127 | 0.0000035 |
| TRAPPC9    | trafficking protein particle complex 9                                    | 1.60 | down | 0.000071 | 0.0000011 |
| TRDMT1     | tRNA aspartic acid methyltransferase 1                                    | 1.79 | down | 0.000108 | 0.0000026 |
| TRIM33     | tripartite motif containing 33                                            | 1.97 | down | 0.000626 | 0.0000553 |
| TRIM65     | tripartite motif containing 65                                            | 1.80 | down | 0.000449 | 0.0000316 |
| TRMT10A    | tRNA methyltransferase 10 homolog A ( <i>S. cerevisiae</i> )              | 2.00 | down | 0.000179 | 0.0000063 |
| TRMT10C    | tRNA methyltransferase 10 homolog C ( <i>S. cerevisiae</i> )              | 1.55 | down | 0.000022 | 0.0000001 |
| TRMT61A    | tRNA methyltransferase 61 homolog A ( <i>S. cerevisiae</i> )              | 1.84 | down | 0.000770 | 0.0000761 |
| TRMT61B    | tRNA methyltransferase 61 homolog B ( <i>S. cerevisiae</i> )              | 1.87 | down | 0.000783 | 0.0000781 |

|         |                                                                    |      |      |          |           |
|---------|--------------------------------------------------------------------|------|------|----------|-----------|
| TSEN2   | TSEN2 tRNA splicing endonuclease subunit                           | 2.22 | down | 0.001278 | 0.0001651 |
| TSTD3   | thiosulfate sulfurtransferase (rhodanese)-like domain containing 3 | 1.50 | down | 0.000045 | 0.0000004 |
| TTC12   | tetratricopeptide repeat domain 12                                 | 1.94 | down | 0.000417 | 0.0000278 |
| TTC27   | tetratricopeptide repeat domain 27                                 | 1.67 | down | 0.001069 | 0.0001262 |
| TTC7A   | tetratricopeptide repeat domain 7A                                 | 1.55 | down | 0.001656 | 0.0002404 |
| TTF2    | transcription termination factor, RNA polymerase II                | 1.50 | down | 0.000226 | 0.0000097 |
| TTLL1   | tubulin tyrosine ligase-like family, member 1                      | 1.99 | down | 0.000199 | 0.0000076 |
| TUBB4B  | tubulin, beta 4B class IVb                                         | 1.54 | down | 0.000621 | 0.0000543 |
| TUBE1   | tubulin, epsilon 1                                                 | 1.55 | down | 0.000425 | 0.0000285 |
| TUBGCP5 | tubulin, gamma complex associated protein 5                        | 1.51 | down | 0.003411 | 0.0006670 |
| TUG1    | taurine up-regulated 1 (non-protein coding)                        | 1.93 | down | 0.000922 | 0.0001006 |
| TULP4   | tubby like protein 4                                               | 1.84 | down | 0.000147 | 0.0000045 |
| TXNDC11 | thioredoxin domain containing 11                                   | 1.74 | down | 0.000872 | 0.0000921 |
| U2SURP  | U2 snRNP-associated SURP domain containing                         | 2.30 | down | 0.000633 | 0.0000562 |
| UBA6    | ubiquitin-like modifier activating enzyme 6                        | 2.31 | down | 0.001432 | 0.0001956 |
| UBAP2L  | ubiquitin associated protein 2-like                                | 2.96 | down | 0.000803 | 0.0000810 |
| UBASH3B | ubiquitin associated and SH3 domain containing B                   | 1.94 | down | 0.000436 | 0.0000299 |
| UBE2E1  | ubiquitin-conjugating enzyme E2E 1                                 | 1.67 | down | 0.003068 | 0.0005737 |
| UBE3B   | ubiquitin protein ligase E3B                                       | 1.96 | down | 0.001109 | 0.0001329 |
| UBE3D   | ubiquitin protein ligase E3D                                       | 1.59 | down | 0.000512 | 0.0000404 |
| UBE4B   | ubiquitination factor E4B                                          | 1.58 | down | 0.000204 | 0.0000080 |
| UBP1    | upstream binding protein 1 (LBP-1a)                                | 1.73 | down | 0.001019 | 0.0001172 |
| UBQLN4  | ubiquilin 4                                                        | 1.78 | down | 0.000899 | 0.0000966 |
| UFSP1   | UFM1-specific peptidase 1 (non-functional)                         | 1.54 | down | 0.003085 | 0.0005781 |
| UNC5A   | unc-5 homolog A (C. elegans)                                       | 1.95 | down | 0.001788 | 0.0002699 |
| URB1    | URB1 ribosome biogenesis 1 homolog (S. cerevisiae)                 | 1.91 | down | 0.000917 | 0.0000998 |
| UROS    | uroporphyrinogen III synthase                                      | 1.75 | down | 0.000412 | 0.0000271 |
| USP10   | ubiquitin specific peptidase 10                                    | 1.76 | down | 0.001823 | 0.0002785 |
| USP13   | ubiquitin specific peptidase 13 (isopeptidase T-3)                 | 1.82 | down | 0.002255 | 0.0003701 |

|            |                                                                        |      |      |          |           |
|------------|------------------------------------------------------------------------|------|------|----------|-----------|
| USP25      | ubiquitin specific peptidase 25                                        | 3.19 | down | 0.000166 | 0.0000055 |
| USP40      | ubiquitin specific peptidase 40                                        | 2.04 | down | 0.000459 | 0.0000332 |
| USP47      | ubiquitin specific peptidase 47                                        | 1.59 | down | 0.001733 | 0.0002577 |
| USP7       | ubiquitin specific peptidase 7 (herpes virus-associated)               | 1.69 | down | 0.000389 | 0.0000249 |
| UTP15      | UTP15, U3 small nucleolar ribonucleoprotein, homolog (S. cerevisiae)   | 1.72 | down | 0.000949 | 0.0001055 |
| UTP20      | UTP20, small subunit (SSU) processome component, homolog (yeast)       | 2.07 | down | 0.000081 | 0.0000015 |
| VAC14      | Vac14 homolog (S. cerevisiae)                                          | 1.80 | down | 0.000167 | 0.0000056 |
| VAPA       | VAMP (vesicle-associated membrane protein)-associated protein A, 33kDa | 3.66 | down | 0.002586 | 0.0004501 |
| VAPB       | VAMP (vesicle-associated membrane protein)-associated protein B and C  | 2.05 | down | 0.002345 | 0.0003903 |
| VPS9D1-AS1 | VPS9D1 antisense RNA 1                                                 | 1.57 | down | 0.003773 | 0.0007634 |
| VTI1A      | vesicle transport through interaction with t-SNAREs 1A                 | 2.22 | down | 0.000586 | 0.0000501 |
| VWA8       | von Willebrand factor A domain containing 8                            | 2.54 | down | 0.000723 | 0.0000686 |
| WAPAL      | wings apart-like homolog (Drosophila)                                  | 1.52 | down | 0.000716 | 0.0000677 |
| WDR12      | WD repeat domain 12                                                    | 1.66 | down | 0.000992 | 0.0001132 |
| WDR35      | WD repeat domain 35                                                    | 2.33 | down | 0.000917 | 0.0000998 |
| WDR36      | WD repeat domain 36                                                    | 1.73 | down | 0.000321 | 0.0000182 |
| WDR43      | WD repeat domain 43                                                    | 1.50 | down | 0.001126 | 0.0001361 |
| WDR70      | WD repeat domain 70                                                    | 1.91 | down | 0.000079 | 0.0000014 |
| WDR78      | WD repeat domain 78                                                    | 2.62 | down | 0.000257 | 0.0000124 |
| WHSC1      | Wolf-Hirschhorn syndrome candidate 1                                   | 1.79 | down | 0.000487 | 0.0000367 |
| WWC3       | WWC family member 3                                                    | 1.86 | down | 0.000424 | 0.0000284 |
| WWP2       | WW domain containing E3 ubiquitin protein ligase 2                     | 1.59 | down | 0.002635 | 0.0004628 |
| XXYL1      | xyloside xylosyltransferase 1                                          | 2.05 | down | 0.000165 | 0.0000054 |
| YARS       | tyrosyl-tRNA synthetase                                                | 1.55 | down | 0.004255 | 0.0009121 |
| YLPM1      | YLP motif containing 1                                                 | 1.69 | down | 0.002439 | 0.0004129 |
| YPEL4      | yippee-like 4 (Drosophila)                                             | 1.66 | down | 0.001437 | 0.0001967 |
| YTHDC2     | YTH domain containing 2                                                | 1.94 | down | 0.000453 | 0.0000322 |

|         |                                                     |      |      |          |           |
|---------|-----------------------------------------------------|------|------|----------|-----------|
| ZBED4   | zinc finger, BED-type containing 4                  | 1.62 | down | 0.000250 | 0.0000116 |
| ZBTB2   | zinc finger and BTB domain containing 2             | 1.67 | down | 0.000786 | 0.0000786 |
| ZCCHC8  | zinc finger, CCHC domain containing 8               | 1.50 | down | 0.000496 | 0.0000381 |
| ZCWPW1  | zinc finger, CW type with PWWP domain 1             | 1.52 | down | 0.004179 | 0.0008876 |
| ZDHHC3  | zinc finger, DHHC-type containing 3                 | 2.00 | down | 0.000450 | 0.0000317 |
| ZFC3H1  | zinc finger, C3H1-type containing                   | 2.28 | down | 0.000180 | 0.0000064 |
| ZFYVE28 | zinc finger, FYVE domain containing 28              | 1.67 | down | 0.003512 | 0.0006941 |
| ZMYM2   | zinc finger, MYM-type 2                             | 1.62 | down | 0.002421 | 0.0004089 |
| ZMYM4   | zinc finger, MYM-type 4                             | 1.52 | down | 0.000028 | 0.0000001 |
| ZNF215  | zinc finger protein 215                             | 1.81 | down | 0.000169 | 0.0000057 |
| ZNF280D | zinc finger protein 280D                            | 1.63 | down | 0.003628 | 0.0007259 |
| ZNF302  | zinc finger protein 302                             | 1.88 | down | 0.001259 | 0.0001607 |
| ZNF469  | zinc finger protein 469                             | 1.74 | down | 0.000484 | 0.0000364 |
| ZNF485  | zinc finger protein 485                             | 1.64 | down | 0.000831 | 0.0000846 |
| ZNF497  | zinc finger protein 497                             | 2.09 | down | 0.000338 | 0.0000200 |
| ZNF581  | zinc finger protein 581                             | 1.84 | down | 0.000086 | 0.0000016 |
| ZNF706  | zinc finger protein 706                             | 1.71 | down | 0.000168 | 0.0000057 |
| ZNF775  | zinc finger protein 775                             | 1.62 | down | 0.001198 | 0.0001488 |
| ZNF789  | zinc finger protein 789                             | 1.98 | down | 0.000929 | 0.0001020 |
| ZNRF1   | zinc and ring finger 1, E3 ubiquitin protein ligase | 2.20 | down | 0.000205 | 0.0000080 |

## Supplementary Table 2. Redox-related, FUra-responsive genes as determined by cDNA microarray analysis

Microarray data from Supplemental Table 1 were queried with regard to the GO and KEGG databases (see text) to identify genes involved in redox metabolism. The fold change represents the extent of induction by exposure to 10  $\mu$ M FUra for 24 h. The p-value is corrected for multiple testing using the Benjamini-Hochberg algorithm (see Materials and Methods).

| Gene Symbol | Description                                                                                                                                       | Fold Change | Regulation | Corrected p-value | p-value  |
|-------------|---------------------------------------------------------------------------------------------------------------------------------------------------|-------------|------------|-------------------|----------|
| AKR1B10     | aldo-keto reductase family 1, member B10 (aldose reductase) (AKR1B10), mRNA [NM_020299]                                                           | 6.37        | up         | 0.000054          | 0.000001 |
| AKR1B15     | aldo-keto reductase family 1, member B15 (AKR1B15), mRNA [NM_001080538]                                                                           | 6.04        | up         | 0.000259          | 0.000012 |
| AKR1C1      | aldo-keto reductase family 1, member C1 (dihydrodiol dehydrogenase 1; 20-alpha (3-alpha)-hydroxysteroid dehydrogenase) (AKR1C1), mRNA [NM_001353] | 2.31        | up         | 0.001859          | 0.000286 |
| AKR1C3      | aldo-keto reductase family 1, member C3 (3-alpha hydroxysteroid dehydrogenase, type II) (AKR1C3), mRNA [NM_003739]                                | 1.91        | up         | 0.001267          | 0.000163 |
| ALDH3A1     | aldehyde dehydrogenase 3 family, member A1 (ALDH3A1), transcript variant 1, mRNA [NM_001135168]                                                   | 2.02        | up         | 0.001249          | 0.000159 |
| ALDH4A1     | aldehyde dehydrogenase 4 family, member A1 (ALDH4A1), nuclear gene encoding mitochondrial protein, transcript variant P5CDhS, mRNA [NM_170726]    | 2.56        | up         | 0.000558          | 0.000046 |
| BLVRB       | biliverdin reductase B (flavin reductase (NADPH)) (BLVRB), mRNA [NM_000713]                                                                       | 2.01        | up         | 0.001495          | 0.000208 |
| CBR3        | carbonyl reductase 3 (CBR3), mRNA [NM_001236]                                                                                                     | 1.89        | up         | 0.003410          | 0.000667 |
| CYB5R1      | cytochrome b5 reductase 1 (CYB5R1), mRNA [NM_016243]                                                                                              | 1.66        | up         | 0.002679          | 0.000473 |
| DHRS13      | dehydrogenase/reductase (SDR family) member 13 (DHRS13), mRNA [NM_144683]                                                                         | 1.87        | up         | 0.001244          | 0.000158 |
| DHRS7       | dehydrogenase/reductase (SDR family) member 7 (DHRS7), mRNA [NM_016029]                                                                           | 1.59        | up         | 0.000098          | 0.000002 |
| FDXR        | ferredoxin reductase (FDXR), nuclear gene encoding mitochondrial protein, transcript variant 2, mRNA [NM_004110]                                  | 2.27        | up         | 0.000178          | 0.000006 |
| GLRX        | glutaredoxin (thioltransferase) (GLRX), transcript variant 1, mRNA [NM_002064]                                                                    | 1.54        | up         | 0.000476          | 0.000035 |
| GLRX2       | glutaredoxin 2 (GLRX2), transcript variant 1, mRNA [NM_016066]                                                                                    | 1.68        | up         | 0.000623          | 0.000055 |
| GPX1        | glutathione peroxidase 1 (GPX1), transcript variant 2, mRNA [NM_201397]                                                                           | 1.65        | up         | 0.000812          | 0.000082 |
| HSD3B7      | hydroxy-delta-5-steroid dehydrogenase, 3 beta- and steroid delta-isomerase 7 (HSD3B7), transcript variant 2, mRNA [NM_001142777]                  | 1.66        | up         | 0.000698          | 0.000065 |
| KDSR        | 3-ketodihydrospingosine reductase (KDSR), mRNA [NM_002035]                                                                                        | 1.72        | up         | 0.000967          | 0.000109 |
| LOXL2       | lysyl oxidase-like 2 (LOXL2), mRNA [NM_002318]                                                                                                    | 1.59        | up         | 0.000106          | 0.000002 |
| LOXL4       | lysyl oxidase-like 4 (LOXL4), mRNA [NM_032211]                                                                                                    | 2.04        | up         | 0.000887          | 0.000095 |

|         |                                                                                                                                                               |      |      |          |          |
|---------|---------------------------------------------------------------------------------------------------------------------------------------------------------------|------|------|----------|----------|
| NDOR1   | NADPH dependent diflavin oxidoreductase 1 (NDOR1), transcript variant 1, mRNA [NM_001144026]                                                                  | 1.84 | up   | 0.000445 | 0.000031 |
| NDUFB11 | NADH dehydrogenase (ubiquinone) 1 beta subcomplex, 11, 17.3kDa (NDUFB11), nuclear gene encoding mitochondrial protein, transcript variant 1, mRNA [NM_019056] | 1.54 | up   | 0.000022 | 0.000000 |
| PRODH   | proline dehydrogenase (oxidase) 1 (PRODH), nuclear gene encoding mitochondrial protein, transcript variant 1, mRNA [NM_016335]                                | 1.95 | up   | 0.000208 | 0.000008 |
| RRM1    | ribonucleotide reductase M1 (RRM1), mRNA [NM_001033]                                                                                                          | 1.54 | up   | 0.000884 | 0.000094 |
| SOD2    | superoxide dismutase 2, mitochondrial (SOD2), nuclear gene encoding mitochondrial protein, transcript variant 2, mRNA [NM_001024465]                          | 1.56 | up   | 0.000307 | 0.000017 |
| SQRDL   | sulfide quinone reductase-like (yeast) (SQRDL), nuclear gene encoding mitochondrial protein, mRNA [NM_021199]                                                 | 1.54 | up   | 0.000185 | 0.000007 |
| TP53I3  | tumor protein p53 inducible protein 3 (TP53I3), transcript variant 1, mRNA [NM_004881]                                                                        | 4.78 | up   | 0.000041 | 0.000000 |
| TXNDC17 | thioredoxin domain containing 17 (TXNDC17), mRNA [NM_032731]                                                                                                  | 1.61 | up   | 0.000740 | 0.000071 |
| ACAD9   | acyl-CoA dehydrogenase family, member 9 (ACAD9), nuclear gene encoding mitochondrial protein, transcript variant 1, mRNA [NM_014049]                          | 1.58 | down | 0.003176 | 0.000603 |
| ACADS   | acyl-CoA dehydrogenase, C-2 to C-3 short chain (ACADS), nuclear gene encoding mitochondrial protein, mRNA [NM_000017]                                         | 1.64 | down | 0.004722 | 0.001056 |
| ACADSB  | acyl-Coenzyme A dehydrogenase, short/branched chain (ACADSB), nuclear gene encoding mitochondrial protein, mRNA [NM_001609]                                   | 2.01 | down | 0.000376 | 0.000023 |
| ALKBH3  | alkB, alkylation repair homolog 3 (E. coli) (ALKBH3), mRNA [NM_139178]                                                                                        | 1.55 | down | 0.001059 | 0.000125 |
| AOC3    | amine oxidase, copper containing 3 (vascular adhesion protein 1) (AOC3), mRNA [NM_003734]                                                                     | 1.64 | down | 0.001775 | 0.000267 |
| BCKDHB  | branched chain keto acid dehydrogenase E1, beta polypeptide (BCKDHB), nuclear gene encoding mitochondrial protein, transcript variant 2, mRNA [NM_000056]     | 1.54 | down | 0.003890 | 0.000798 |
| CHDH    | choline dehydrogenase (CHDH), nuclear gene encoding mitochondrial protein, mRNA [NM_018397]                                                                   | 1.83 | down | 0.000694 | 0.000065 |
| CPOX    | coproporphyrinogen oxidase (CPOX), mRNA [NM_000097]                                                                                                           | 1.64 | down | 0.001790 | 0.000270 |
| CRYL1   | crystallin, lambda 1 (CRYL1), mRNA [NM_015974]                                                                                                                | 1.96 | down | 0.000274 | 0.000014 |
| CRYZ    | crystallin, zeta (quinone reductase) (CRYZ), transcript variant 1, mRNA [NM_001130042]                                                                        | 1.68 | down | 0.000543 | 0.000044 |
| CYB5RL  | cytochrome b5 reductase-like (CYB5RL), mRNA [NM_001031672]                                                                                                    | 2.30 | down | 0.000351 | 0.000021 |
| DHRS2   | dehydrogenase/reductase (SDR family) member 2 (DHRS2), transcript variant 1, mRNA [NM_182908]                                                                 | 2.94 | down | 0.000022 | 0.000000 |
| DHRS3   | dehydrogenase/reductase (SDR family) member 3 (DHRS3), mRNA [NM_004753]                                                                                       | 1.61 | down | 0.000253 | 0.000012 |



|         |                                                                                                                                                       |      |      |          |          |
|---------|-------------------------------------------------------------------------------------------------------------------------------------------------------|------|------|----------|----------|
| HMGCR   | 3-hydroxy-3-methylglutaryl-CoA reductase (HMGCR), transcript variant 1, mRNA [NM_000859]                                                              | 1.77 | down | 0.000234 | 0.000010 |
| HSD17B8 | hydroxysteroid (17-beta) dehydrogenase 8 (HSD17B8), mRNA [NM_014234]                                                                                  | 2.10 | down | 0.000211 | 0.000009 |
| HTATIP2 | HIV-1 Tat interactive protein 2, 30kDa (HTATIP2), transcript variant 2, mRNA [NM_006410]                                                              | 1.81 | down | 0.003166 | 0.000600 |
| MTHFD1L | methylenetetrahydrofolate dehydrogenase (NADP+ dependent) 1-like (MTHFD1L), nuclear gene encoding mitochondrial protein, mRNA [NM_015440]             | 1.53 | down | 0.000167 | 0.000006 |
| PDK1    | pyruvate dehydrogenase kinase, isozyme 1 (PDK1), nuclear gene encoding mitochondrial protein, mRNA [NM_002610]                                        | 1.72 | down | 0.000773 | 0.000077 |
| PDP1    | pyruvate dehydrogenase phosphatase catalytic subunit 1 (PDP1), nuclear gene encoding mitochondrial protein, transcript variant 2, mRNA [NM_001161779] | 1.66 | down | 0.000426 | 0.000029 |
| PECR    | peroxisomal trans-2-enoyl-CoA reductase (PECR), mRNA [NM_018441]                                                                                      | 1.54 | down | 0.000737 | 0.000071 |
| PYCR1   | pyrroline-5-carboxylate reductase 1 (PYCR1), transcript variant 1, mRNA [NM_006907]                                                                   | 1.84 | down | 0.001594 | 0.000228 |
| PYCRL   | pyrroline-5-carboxylate reductase-like (PYCRL), mRNA [NM_023078]                                                                                      | 1.82 | down | 0.000061 | 0.000001 |
| PYROXD1 | pyridine nucleotide-disulphide oxidoreductase domain 1 (PYROXD1), mRNA [NM_024854]                                                                    | 1.89 | down | 0.000460 | 0.000033 |
| SORD    | sorbitol dehydrogenase (SORD), mRNA [NM_003104]                                                                                                       | 1.94 | down | 0.002062 | 0.000328 |
| TMX2    | thioredoxin-related transmembrane protein 2 (TMX2), transcript variant 1, mRNA [NM_015959]                                                            | 1.63 | down | 0.000286 | 0.000015 |
| TXNDC11 | thioredoxin domain containing 11 (TXNDC11), mRNA [NM_015914]                                                                                          | 1.74 | down | 0.000872 | 0.000092 |
